# Supplementary material for: Fused diethynylbenzenes and phenanthrenes via arynes with alkynylsilanes
Source: Royal Society of Chemistry journal article supplement (doi:10.1039/d2ob02046g), 2023-01-01

# Supplementary Information

## Fused Diethynylbenzenes and Phenanthrenes via Arynes with Alkynylsilanes

Jie Dong, Yu Lei, Qiong Hu, Lingli Zong, Ke Zhang, Yajuan Zhang and Yimin Hu\*

*School of Chemistry and Materials Science, Anhui Normal University,*

*Wuhu, Anhui 241002, China E-mail: [yiminhu@ahnu.edu.cn](mailto:yiminhu@ahnu.edu.cn)*

## Contents

|                                                                          |     |
|--------------------------------------------------------------------------|-----|
| 1. General Experimental Procedures.....                                  | S2  |
| 2. Characterization Data for the New Compounds.....                      | S5  |
| 3. X-Ray Structure for 3l, 3o, 6c and 8g.....                            | S18 |
| 4. <sup>1</sup> H and <sup>13</sup> C NMR Spectra for New Compounds..... | S20 |

## 1. General experimental procedures

All the catalytic reactions were performed under an argon atmosphere using the oven-dried Schlenk flask. The chemicals were purchased from Alfa Aesar, TCI and Acros Chemicals. All solvents and materials were pre-dried, redistilled or recrystallized before use.  $^1\text{H}$  NMR (400 MHz) and  $^{13}\text{C}$  NMR (101 MHz) spectra were recorded on a Bruker Avance 400 spectrometer with  $\text{CDCl}_3$  as the solvent. Chemical shifts are reported in ppm by assigning TMS resonance in the  $^1\text{H}$  NMR spectra as 0.00 ppm,  $\text{CDCl}_3$  resonance in the  $^{13}\text{C}$  spectra as 77.2 ppm. Data for  $^1\text{H}$  NMR are reported as follows: chemical shift ( $\delta$  ppm), multiplicity (s = singlet, d = doublet, t = triplet, q = quartet, m = multiplet), coupling constant (Hz) and integration. Data for  $^{13}\text{C}$  NMR are recorded with broad-band proton decoupling technique and are reported in terms of chemical shift. Column chromatography was performed on silica gel 300–400 mesh. Thin-layer chromatography (TLC) was performed on silica gel plates (HSGF 254). Melting points were determined using a Gallenkamp melting point apparatus and are uncorrected. The FT-IR spectra were recorded from KBr pellets or thin film from  $\text{CHCl}_3$  on the NaCl window in the 4000-400  $\text{cm}^{-1}$  ranges on a Nicolet 5DX spectrometer. All HRMS spectra were recorded using EI at 70 eV. X-ray Crystallography diffraction data of **3l**, **3o**, **6c** and **8g** were collected at room temperature with a Bruker SMART Apex CCD diffractometer with Mo-K $\alpha$  radiation ( $\lambda = 0.71073 \text{ \AA}$ ) with a graphite monochromator using the  $\omega$ -scan mode. Data reductions and absorption corrections were performed with SAINT and SADABS software, respectively. The structure was solved by direct methods and refined on  $F^2$  by full-matrix least squares using SHELXTL. All non-hydrogen atoms were treated anisotropically. The positions of hydrogen atoms were generated geometrically.

### (1) General procedure for preparation of tetraynes <sup>1</sup>:

#### *Preparation of catalyst Pd(PPh<sub>3</sub>)<sub>2</sub>Cl<sub>2</sub>*

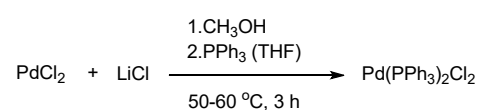

3.54 g  $\text{PdCl}_2$  and 4 g  $\text{LiCl}$  were mixed in a 500 mL three-necked flask with 150-200 mL methanol as solvent, magnetically stirred and heated in oil bath at 50-60  $^\circ\text{C}$ . After the solid was dissolved, 25 mL of THF (removed water with sodium wire) containing 13.1 g  $\text{PPh}_3$  were added in the above three-necked flask, and the color of the solution changed from brown to yellow, reflux reaction for 3 hours. After reaction solution cooled, filtered and washed with anhydrous ethanol, yellow solid  $\text{Pd}(\text{PPh}_3)_2\text{Cl}_2$  catalyst was obtained finally.

#### *Preparation of diyne substrates*

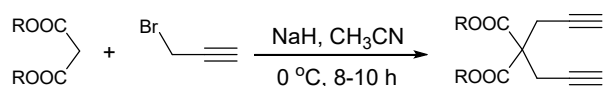

R = Me, Et, <sup>i</sup>Pr

10 g NaH (60%) and 200-300 mL acetonitrile were added in 500 mL three-necked flask with magnetic stirring. 100 mmol malonate and 30 g 3-bromopropyne (98%) were added in the above 500 mL three-necked flask dropwise in turn by separatory funnel, magnetically stirred for 8-10 h under ice-water bath. The organic phase was extracted with ethyl acetate and dried with anhydrous MgSO<sub>4</sub>. The solvent was evaporated in vacuo and diyne substrates as white solid were obtained finally.

#### Preparation of brominated alkynes

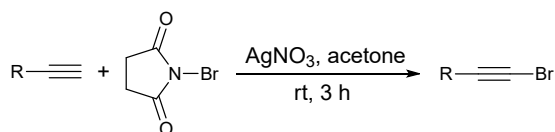

10.68 g 1-bromopyrrolidine-2,5-dione (NBS), 0.43 g AgNO<sub>3</sub>, and 50 mmol phenylacetylene or substituted phenylacetylene or alkyl alkyne were added in 250 mL three-necked flask in turn, 100 mL acetone as a solvent, magnetically stirred at room temperature for 3 h. The organic phase was extracted with *n*-hexane and dried with anhydrous MgSO<sub>4</sub>. The solvent was evaporated in vacuo and brominated alkynes compound as brown solid were obtained finally.

#### Preparation of tetrayne substrates

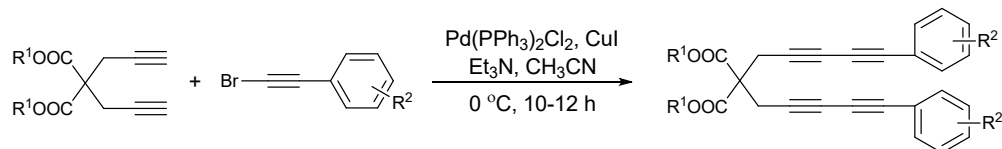

R<sup>1</sup> = Me, Et, <sup>i</sup>Pr

R<sup>2</sup> = H, *p*-Me, *m*-Me, *p*-Et, *p*-Cl, *p*-F

0.3 g Pd(PPh<sub>3</sub>)<sub>2</sub>Cl<sub>2</sub>, 0.25 g CuI and 20 mmol diyne substrate were added in 500 mL three-necked flask, protected with anhydrous anaerobic conditions under argon. After 0.5 h, 200-300 mL acetonitrile, 8.08 g Et<sub>3</sub>N and 50 mmol brominated aryl alkyne were added in turn, magnetically stirred for 10-12 h under ice-water bath. The organic phase was extracted with ethyl acetate and dried with anhydrous MgSO<sub>4</sub>. It was separated by column chromatography on silica gel to obtain tetrayne substrate as yellow solid finally.

#### Preparation of 4-methyl-*N*, *N*-di (prop-2-yn-1-yl) benzenesulfonamide

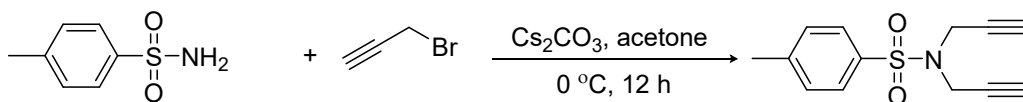

40 mmol *p*-toluenesulfonamide, 120 mmol Cs<sub>2</sub>CO<sub>3</sub>, 200 mL acetone as solvent were added in 500 mL three-necked flask, protected with anhydrous anaerobic conditions under argon. After 0.5 h, 120 mmol 3-bromopropyne were added dropwise by constant pressure funnel in turn, magnetically stirred under ice-water bath, reaction for 24 hours. The organic phase was extracted with ethyl acetate and dried with

anhydrous  $\text{MgSO}_4$ . It was separated by column chromatography on silica gel to obtain the product as yellow solid finally.

*Preparation of 4-methyl-N, N-di (nona-2,4-diyne-1-yl) benzenesulfonamide*

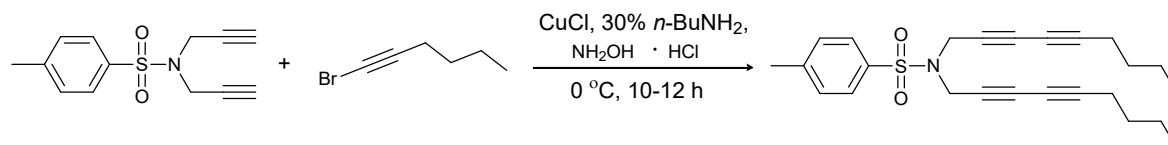

0.7 g  $\text{CuCl}$ , 0.28 g  $\text{NH}_2\text{OH}\cdot\text{HCl}$  and 20 mmol 4-methyl-*N, N*-di (prop-2-yn-1-yl) benzenesulfonamide were added in 500 mL three-necked flask, protected with anhydrous anaerobic conditions under argon. After 0.5 h, 90 mL 30% *n*- $\text{BuNH}_2$  aqueous solution (27 g *n*- $\text{BuNH}_2$  + 64 mL water) and 60 mmol 1-bromide hexyne (freshly prepared) was added dropwise by the constant pressure funnel in turn, 100-150 mL  $\text{CH}_2\text{Cl}_2$  as solvent, magnetically stirred under ice-water bath, reaction for 10-12 h. The organic phase was extracted with ethyl acetate and dried with anhydrous  $\text{MgSO}_4$ . It was separated by column chromatography on silica gel to obtain the product as yellow oil finally.

**(2) General procedure for the reaction of 1,4-bis(trimethylsilyl)-1,3-butadiyne and HDDA-derived benzyne:**

Tetrayne (1.0 mmol), 1,4-bis(trimethylsilyl)-1,3-butadiyne (1.4 equiv), are mixed in an oven-dried Schlenk tube (50 mL) equipped with a magnetic stir bar and heated in a 105-110 °C oil bath in 4 mL toluene for 20 hours under air. The reaction mixture was cooled to room temperature, and the solvent was evaporated in vacuo. Followed by preparative thin-layer chromatography (TLC) on silica gel with the appropriate mixture of petroleum ether and ethyl acetate, Butadiynylation products are separated and purified by using column chromatography on silica gel. The eluent is EtOAc: petroleum ether = 1: 200.

**(3) General procedure for the reaction of trimethyl(phenylethynyl)silane and HDDA-derived benzyne:**

Tetrayne (1.0 mmol), trimethyl(phenylethynyl)silane (1.4 equiv), are mixed in an oven-dried Schlenk tube (50 mL) equipped with a magnetic stir bar and heated in a 110-115 °C oil bath in 4 mL  $\text{CH}_3\text{CN}$  for 24 hours under air. The reaction mixture was cooled to room temperature, and the solvent was evaporated in vacuo. Followed by preparative thin-layer chromatography (TLC) on silica gel with the appropriate mixture of petroleum ether and ethyl acetate, Butadiynylation products are separated and purified by using column chromatography on silica gel. The eluent is EtOAc: petroleum ether = 1: 80.

**(4) General procedure for the base promoted reaction of trimethyl(phenylethynyl)silane and HDDA-derived benzyne:**

Tetrayne (1.0 mmol), trimethyl(phenylethynyl)silane (1.2 equiv), and Cs<sub>2</sub>CO<sub>3</sub> (1.0 equiv), are mixed in an oven-dried Schlenk tube (50 mL) equipped with a magnetic stir bar and heated in a 100-105 °C oil bath in 4 mL CH<sub>3</sub>CN for 12 hours under air. The reaction mixture was cooled to room temperature, and the solvent was evaporated in vacuo. Followed by preparative thin-layer chromatography (TLC) on silica gel with the appropriate mixture of petroleum ether and ethyl acetate, Butadiynylation products are separated and purified by using column chromatography on silica gel. The eluent is EtOAc: petroleum ether = 1: 100.

## References:

- (a) J. Chen, V. Palani and T. R. Hoye, *J. Am. Chem. Soc.*, 2016, **138**, 4318–4321; (b) N.-K. Lee, S. Y. Yun, P. Mamidipalli, R. M. Salzman, D. Lee, T. Zhou and Y. Xia, *J. Am. Chem. Soc.*, 2014, **136**, 4363–4368; (c) B. Liu, C. Mao, Q. Hu, L. Yao and Y. Hu, *Org. Chem. Front.*, 2019, **6**, 2788–2791; (d) X. Zheng, B. Liu, F. Yang, Q. Hu, L. Yao and Y. Hu, *Org. Lett.*, 2020, **22**, 956–959.

## 2. Characterization Data for the New Compounds

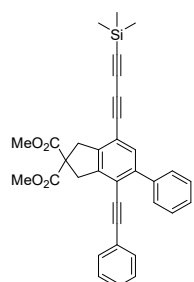

### Dimethyl 5-phenyl-4-(phenylethynyl)-7-((trimethylsilyl)buta-1,3-diyne-1-yl)-1,3-dihydro-2H-indene-2,2-dicarboxylate (3a)

White solid; (387 mg, 73% yield); m. p. 137-142 °C; TLC (petroleum ether/EtOAc = 8:1): R<sub>f</sub> = 0.47. <sup>1</sup>H NMR (400 MHz, CDCl<sub>3</sub>) δ 7.60 (d, *J* = 6.8 Hz, 2H; Ar-H), 7.44 (t, *J* = 6.9 Hz, 2H; Ar-H), 7.40-7.37 (m, 2H; Ar-H), 7.35-7.33 (m, 2H; Ar-H), 7.30-7.28 (m, 3H; Ar-H), 3.84 (s, 2H; C(COOMe)<sub>2</sub>-CH<sub>2</sub>), 3.80 (s, 6H; -C(COOCH<sub>3</sub>)<sub>2</sub>), 3.79 (s, 2H; C(COOMe)<sub>2</sub>-CH<sub>2</sub>), 0.25 (s, 9H; -C≡C-Si(CH<sub>3</sub>)<sub>3</sub>). <sup>13</sup>C NMR (101 MHz, CDCl<sub>3</sub>) δ 171.84, 143.48, 142.95, 142.53, 139.39, 132.36, 131.54, 129.27, 128.63, 128.36, 128.02, 127.78, 123.02, 119.19, 117.21, 98.32, 92.60, 87.69, 86.87, 78.75, 74.42, 59.00, 53.25, 41.31, 40.71, 1.05, -0.39. FT-IR (KBr): ν = 2962, 2200, 1734, 1600, 1492, 1437, 1260, 1159, 1078, 1025, 849, 698 cm<sup>-1</sup>. HRMS (APCI-TOF): *m/z* calcd for C<sub>34</sub>H<sub>30</sub>O<sub>4</sub>Si [M+Na]<sup>+</sup>: 553.1806, found 553.1807.

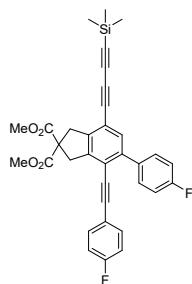

**Dimethyl 5-(4-fluorophenyl)-4-((4-fluorophenyl)ethynyl)-7-((trimethylsilyl)buta-1,3-diyne-1-yl)-1,3-dihydro-2H-indene-2,2-dicarboxylate (3b)**

White solid; (430 mg, 76% yield); m. p. 186-188 °C; TLC (petroleum ether/EtOAc = 8:1):  $R_f$  = 0.58.  $^1\text{H NMR}$  (400 MHz,  $\text{CDCl}_3$ )  $\delta$  7.54 (t,  $J$  = 6.8 Hz, 2H; Ar-H), 7.37-7.30 (m, 3H; Ar-H), 7.13 (t,  $J$  = 8.5 Hz, 2H; Ar-H), 7.01 (t,  $J$  = 8.5 Hz, 2H; Ar-H), 3.80 (s, 8H;  $\text{C}(\text{COOMe})_2\text{-CH}_2$  &  $-\text{C}(\text{COOCH}_3)_2$ ), 3.78 (s, 2H;  $\text{C}(\text{COOMe})_2\text{-CH}_2$ ), 0.25 (s, 9H;  $-\text{C}\equiv\text{C-Si}(\text{CH}_3)_3$ ).  $^{13}\text{C NMR}$  (101 MHz,  $\text{CDCl}_3$ )  $\delta$  171.77, 162.77(d,  $J_{\text{C-F}}$  = 251.5 Hz), 143.49, 142.69, 141.85, 135.39 (d,  $J$  = 3.0 Hz), 133.44 (d,  $J$  = 8.1 Hz), 132.24, 130.92 (d,  $J$  = 8.1 Hz), 118.96, 118.92, 117.36, 115.91, 115.69, 115.08, 114.87, 97.34, 92.80, 87.59, 86.35, 78.94, 74.18, 58.97, 53.27, 41.25, 40.66, 1.05, -0.41. **FT-IR** (KBr):  $\nu$  = 2963, 2199, 1736, 1600, 1508, 1230, 1098, 1021, 801, 481  $\text{cm}^{-1}$ . **HRMS** (APCI-TOF):  $m/z$  calcd for  $\text{C}_{34}\text{H}_{28}\text{F}_2\text{O}_4\text{Si}$   $[\text{M}+\text{Na}]^+$ : 589.1617, found 589.1620.

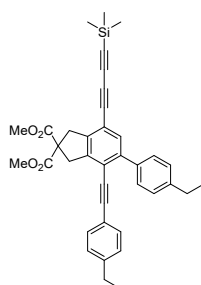

**Dimethyl 5-(4-ethylphenyl)-4-((4-ethylphenyl)ethynyl)-7-((trimethylsilyl)buta-1,3-diyne-1-yl)-1,3-dihydro-2H-indene-2,2-dicarboxylate (3c)**

White solid; (406 mg, 71% yield); m. p. 127-131 °C; TLC (petroleum ether/EtOAc = 8:1):  $R_f$  = 0.65.  $^1\text{H NMR}$  (400 MHz,  $\text{CDCl}_3$ )  $\delta$  7.53 (d,  $J$  = 8.1 Hz, 2H; Ar-H), 7.38 (s, 1H; Ar-H), 7.29-7.26 (m, 4H; Ar-H), 7.14 (d,  $J$  = 8.2 Hz, 2H; Ar-H), 3.82 (s, 2H;  $\text{C}(\text{COOMe})_2\text{-CH}_2$ ), 3.80 (s, 6H;  $\text{C}(\text{COOCH}_3)_2$ ), 3.78 (s, 2H;  $\text{C}(\text{COOMe})_2\text{-CH}_2$ ), 2.72 (q,  $J$  = 7.6 Hz, 2H; Ar- $\text{CH}_2$ ), 2.64 (q,  $J$  = 7.6 Hz, 2H; Ar- $\text{CH}_2$ ), 1.30 (t,  $J$  = 7.6 Hz, 3H;  $-\text{CH}_3$ ), 1.22 (t,  $J$  = 7.6 Hz, 3H;  $-\text{CH}_3$ ), 0.25 (s, 9H;  $-\text{C}\equiv\text{C-Si}(\text{CH}_3)_3$ ).  $^{13}\text{C NMR}$  (101 MHz,  $\text{CDCl}_3$ )  $\delta$  171.90, 145.14, 143.83, 143.35, 142.74, 142.21, 136.73, 132.30, 131.55, 129.19, 127.93, 127.51, 120.29, 119.38, 116.89, 98.61, 92.42, 87.75, 86.49, 78.53, 75.21, 58.97, 52.59, 41.34, 40.70, 29.67, 28.66, 15.61, 15.42, -0.38. **FT-IR** (KBr):  $\nu$  = 2962, 2199, 1736, 1511, 1434, 1252, 1199, 1072, 923, 850  $\text{cm}^{-1}$ . **HRMS** (APCI-TOF):  $m/z$  calcd for  $\text{C}_{38}\text{H}_{38}\text{O}_4\text{Si}$   $[\text{M}+\text{Na}]^+$ : 609.2432, found 609.2435.

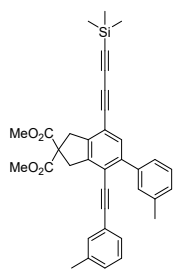

**Dimethyl 5-(m-tolyl)-4-(m-tolylolethynyl)-7-((trimethylsilyl)buta-1,3-diyne-1-yl)-1,3-dihydro-2H-indene-2,2-dicarboxylate (3d)**

White solid; (402 mg, 72% yield); m. p. 102-105 °C; TLC (petroleum ether/EtOAc = 8:1):  $R_f = 0.62$ .  $^1\text{H NMR}$  (400 MHz,  $\text{CDCl}_3$ )  $\delta$  7.43-7.39 (m, 3H; Ar-H), 7.33 (t,  $J = 7.6$  Hz, 1H; Ar-H), 7.21-7.11 (m, 5H; Ar-H), 3.83 (s, 2H;  $\text{C}(\text{COOMe})_2\text{-CH}_2$ ), 3.80 (s, 6H;  $-\text{C}(\text{COOCH}_3)_2$ ), 3.78 (s, 2H;  $\text{C}(\text{COOMe})_2\text{-CH}_2$ ), 2.42 (s, 3H; Ar- $\text{CH}_3$ ), 2.32 (s, 3H; Ar- $\text{CH}_3$ ), 0.25 (s, 9H;  $-\text{C}\equiv\text{C-Si}(\text{CH}_3)_3$ ).  $^{13}\text{C NMR}$  (101 MHz,  $\text{CDCl}_3$ )  $\delta$  171.87, 143.41, 142.94, 142.37, 139.28, 138.04, 137.51, 132.37, 132.10, 130.02, 129.52, 128.62, 128.49, 128.25, 127.92, 126.36, 122.87, 119.23, 117.06, 98.61, 92.51, 87.71, 86.64, 78.63, 74.50, 59.00, 53.25, 41.32, 40.69, 21.57, 21.24, 0.02, -0.39. **FT-IR** (KBr):  $\nu = 2954, 2198, 1729, 1601, 1434, 1363, 1250, 1072, 845, 786, 689, 498$   $\text{cm}^{-1}$ . **HRMS** (APCI-TOF):  $m/z$  calcd for  $\text{C}_{36}\text{H}_{34}\text{O}_4\text{Si}$   $[\text{M}+\text{Na}]^+$ : 581.2119, found 581.2122.

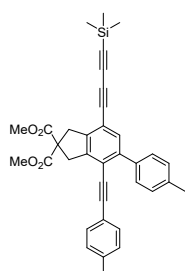

**Dimethyl 5-(p-tolyl)-4-(p-tolylolethynyl)-7-((trimethylsilyl)buta-1,3-diyne-1-yl)-1,3-dihydro-2H-indene-2,2-dicarboxylate (3e)**

White solid; (396 mg, 71% yield); m. p. 160-162 °C; TLC (petroleum ether/EtOAc = 8:1):  $R_f = 0.68$ .  $^1\text{H NMR}$  (400 MHz,  $\text{CDCl}_3$ )  $\delta$  7.51 (d,  $J = 8.1$  Hz, 2H; Ar-H), 7.38 (s, 1H; Ar-H), 7.26 (t,  $J = 8.4$  Hz, 4H; Ar-H), 7.12 (d,  $J = 8.0$  Hz, 2H; Ar-H), 3.83 (s, 2H;  $\text{C}(\text{COOMe})_2\text{-CH}_2$ ), 3.80 (s, 6H;  $-\text{C}(\text{COOCH}_3)_2$ ), 3.78 (s, 2H;  $\text{C}(\text{COOMe})_2\text{-CH}_2$ ), 2.42 (s, 3H; Ar- $\text{CH}_3$ ), 2.35 (s, 3H; Ar- $\text{CH}_3$ ), 0.25 (s, 9H;  $-\text{C}\equiv\text{C-Si}(\text{CH}_3)_3$ ).  $^{13}\text{C NMR}$  (101 MHz,  $\text{CDCl}_3$ )  $\delta$  171.89, 143.41, 142.66, 142.20, 138.84, 137.51, 136.49, 132.33, 131.45, 129.11, 128.73, 120.04, 119.32, 116.92, 98.58, 92.44, 87.75, 86.43, 78.55, 74.58, 58.98, 53.22, 41.34, 40.70, 21.59, 21.31, 0.02, -0.38. **FT-IR** (KBr):  $\nu = 2854, 2196, 1732, 1605, 1511, 1251, 1169, 1076, 850, 818, 637$   $\text{cm}^{-1}$ . **HRMS** (APCI-TOF):  $m/z$  calcd for  $\text{C}_{36}\text{H}_{34}\text{O}_4\text{Si}$   $[\text{M}+\text{Na}]^+$ : 581.2119, found 581.2124.

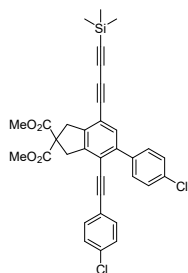

**Dimethyl 5-(4-chlorophenyl)-4-((4-chlorophenyl)ethynyl)-7-((trimethylsilyl)buta-1,3-diyne-1-yl)-1,3-dihydro-2H-indene-2,2-dicarboxylate (3f)**

White solid; (468 mg, 78% yield); m. p. 110-113 °C; TLC (petroleum ether/EtOAc = 8:1):  $R_f$  = 0.59.  $^1\text{H NMR}$  (400 MHz,  $\text{CDCl}_3$ )  $\delta$  7.53-7.49 (m, 2H; Ar-H), 7.43-7.40 (m, 2H; Ar-H), 7.34 (s, 1H; Ar-H), 7.31-7.27 (m, 4H; Ar-H), 3.80 (s, 8H;  $\text{C}(\text{COOMe})_2\text{-CH}_2$  &  $\text{-C}(\text{COOCH}_3)_2$ ), 3.78 (s, 2H;  $\text{C}(\text{COOMe})_2\text{-CH}_2$ ), 0.25 (s, 9H;  $\text{-C}\equiv\text{C-Si}(\text{CH}_3)_3$ ).  $^{13}\text{C NMR}$  (101 MHz,  $\text{CDCl}_3$ )  $\delta$  171.74, 143.70, 142.94, 141.66, 137.75, 134.86, 133.93, 132.71, 132.21, 130.54, 128.82, 128.26, 121.23, 118.66, 117.64, 114.79, 97.35, 92.97, 87.47 (d,  $J$  = 10.1 Hz), 79.10, 74.05, 58.95, 53.30, 41.24, 40.66, 0.02, -0.41. **FT-IR** (KBr):  $\nu$  = 2955, 2200, 1740, 1596, 1491, 1435, 1248, 1158, 1091, 1014, 845  $\text{cm}^{-1}$ . **HRMS** (APCI-TOF):  $m/z$  calcd for  $\text{C}_{34}\text{H}_{28}\text{Cl}_2\text{O}_4\text{Si}$   $[\text{M}+\text{Na}]^+$ : 621.1026, found 621.1033.

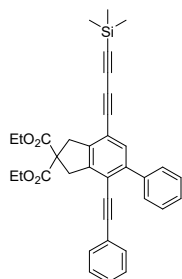

**Diethyl 5-phenyl-4-(phenylethynyl)-7-((trimethylsilyl)buta-1,3-diyne-1-yl)-1,3-dihydro-2H-indene-2,2-dicarboxylate (3g)**

White solid; (402 mg, 72% yield); m. p. 116-118 °C; TLC (petroleum ether/EtOAc = 8:1):  $R_f$  = 0.51.  $^1\text{H NMR}$  (400 MHz,  $\text{CDCl}_3$ )  $\delta$  7.61-7.58 (m, 2H; Ar-H), 7.46-7.42 (m, 2H; Ar-H), 7.40-7.36 (m, 2H; Ar-H), 7.35-7.32 (m, 2H; Ar-H), 7.31-7.28 (m, 3H; Ar-H), 4.26 (q,  $J$  = 6.3 Hz, 4H;  $\text{-C}(\text{COOCH}_2)_2$ ), 3.82 (s, 2H;  $\text{C}(\text{COOEt})_2\text{-CH}_2$ ), 3.77 (s, 2H;  $\text{C}(\text{COOEt})_2\text{-CH}_2$ ), 1.30 (t,  $J$  = 8.0 Hz, 6H;  $\text{-CH}_3$ ), 0.25 (s, 9H;  $\text{-C}\equiv\text{C-Si}(\text{CH}_3)_3$ ).  $^{13}\text{C NMR}$  (101 MHz,  $\text{CDCl}_3$ )  $\delta$  171.42, 143.64, 142.90, 142.67, 139.44, 132.36, 131.53, 129.28, 128.59, 128.34, 128.00, 127.75, 123.07, 119.18, 117.18, 98.23, 92.49, 87.74, 86.92, 78.66, 74.51, 62.04, 59.08, 41.18, 40.60, 14.09, 1.05, 0.02, -0.39. **FT-IR** (KBr):  $\nu$  = 2980, 2197, 1736, 1599, 1438, 1249, 1176, 1047, 921, 851, 759  $\text{cm}^{-1}$ . **HRMS** (APCI-TOF):  $m/z$  calcd for  $\text{C}_{36}\text{H}_{34}\text{O}_4\text{Si}$   $[\text{M}+\text{Na}]^+$ : 581.2119, found 581.2122.



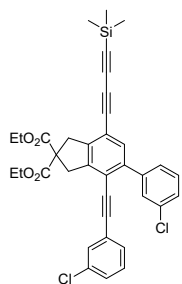

**Diethyl 5-(3-chlorophenyl)-4-((3-chlorophenyl)ethynyl)-7-((trimethylsilyl)buta-1,3-diyne-1-yl)-1,3-dihydro-2H-indene-2,2-dicarboxylate (3h)**

White solid; (458 mg, 73% yield); m. p. 125-126 °C; TLC (petroleum ether/EtOAc = 8:1):  $R_f$  = 0.76.  $^1\text{H NMR}$  (400 MHz,  $\text{CDCl}_3$ )  $\delta$  7.64 (s, 1H; Ar-H), 7.44-7.40 (m, 1H; Ar-H), 7.39-7.37 (m, 4H; Ar-H), 7.31-7.28 (m, 1H; Ar-H), 7.26-7.24 (m, 2H; Ar-H), 4.26 (q,  $J$  = 7.1 Hz, 4H;  $-\text{C}(\text{COOCH}_2)_2$ ), 3.80 (s, 2H;  $\text{C}(\text{COOEt})_2\text{-CH}_2$ ), 3.77 (s, 2H;  $\text{C}(\text{COOEt})_2\text{-CH}_2$ ), 1.31 (t,  $J$  = 7.1 Hz, 6H;  $-\text{CH}_3$ ), 0.25 (s, 9H;  $-\text{C}\equiv\text{C-Si}(\text{CH}_3)_3$ ).  $^{13}\text{C NMR}$  (101 MHz,  $\text{CDCl}_3$ )  $\delta$  171.28, 143.96, 143.35, 141.47, 140.97, 134.26, 133.85, 132.18, 131.35, 129.68 (d,  $J$  = 5.1 Hz), 129.40 (d,  $J$  = 4.0 Hz), 128.99, 127.96, 127.39, 124.47, 118.48, 117.84, 97.12, 92.96, 87.53 (d,  $J$  = 3.0 Hz), 79.17, 74.06, 62.12, 59.06, 41.09, 40.58, 14.09, 0.02, -0.41. **FT-IR** (KBr):  $\nu$  = 2961, 2201, 1726, 1594, 1366, 1252, 1159, 1077, 929, 846, 700  $\text{cm}^{-1}$ . **HRMS** (APCI-TOF):  $m/z$  calcd for  $\text{C}_{36}\text{H}_{32}\text{Cl}_2\text{O}_4\text{Si}$   $[\text{M}+\text{Na}]^+$ : 649.1339, found 649.1345.

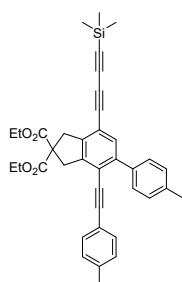

**Diethyl 5-(p-tolyl)-4-(p-tolyethynyl)-7-((trimethylsilyl)buta-1,3-diyne-1-yl)-1,3-dihydro-2H-indene-2,2-dicarboxylate (3i)**

White solid; (399 mg, 68% yield); m. p. 118-120 °C; TLC (petroleum ether/EtOAc = 8:1),  $R_f$  = 0.78.  $^1\text{H NMR}$  (400 MHz,  $\text{CDCl}_3$ )  $\delta$  7.52-7.50 (d,  $J$  = 8.1, 2H; Ar-H), 7.37 (s, 1H; Ar-H), 7.25 (t,  $J$  = 8.2 Hz, 4H; Ar-H), 7.11 (d,  $J$  = 7.8 Hz, 2H; Ar-H), 4.25 (q,  $J$  = 7.1 Hz, 4H;  $-\text{C}(\text{COOCH}_2)_2$ ), 3.81 (s, 2H;  $\text{C}(\text{COOEt})_2\text{-CH}_2$ ), 3.76 (s, 2H;  $\text{C}(\text{COOEt})_2\text{-CH}_2$ ), 2.41 (s, 3H; Ar- $\text{CH}_3$ ), 2.35 (s, 3H; Ar- $\text{CH}_3$ ), 1.29 (t,  $J$  = 7.1 Hz, 6H;  $-\text{CH}_3$ ), 0.25 (s, 9H;  $-\text{C}\equiv\text{C-Si}(\text{CH}_3)_3$ ).  $^{13}\text{C NMR}$  (101 MHz,  $\text{CDCl}_3$ )  $\delta$  171.47, 143.58, 142.61, 142.35, 138.80, 137.48, 136.54, 133.33, 131.45, 129.12, 128.72, 120.09, 119.32, 116.90, 98.50, 92.35, 87.81, 86.49, 78.47, 74.68, 62.03, 59.07, 41.22, 40.60, 21.45 (d,  $J$  = 30.3 Hz), 14.10, -0.37. **FT-IR** (KBr):  $\nu$  = 2963, 2197, 1736, 1606, 1462, 1366, 1248, 1185, 1075, 851, 813  $\text{cm}^{-1}$ . **HRMS** (APCI-TOF):  $m/z$  calcd for  $\text{C}_{38}\text{H}_{38}\text{O}_4\text{Si}$   $[\text{M}+\text{Na}]^+$ : 609.2432, found 609.2438.

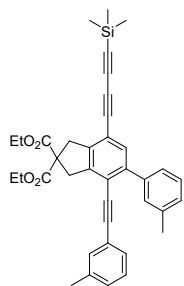

**Diethyl 5-(m-tolyl)-4-(m-tolylethynyl)-7-((trimethylsilyl)buta-1,3-diyne-1-yl)-1,3-dihydro-2H-indene-2,2-dicarboxylate (3j)**

White solid; (393 mg, 67% yield); m. p. 80-83 °C; TLC (petroleum ether/EtOAc = 8:1):  $R_f$  = 0.74.  $^1\text{H NMR}$  (400 MHz,  $\text{CDCl}_3$ )  $\delta$  7.43-7.39 (m, 3H; Ar-H), 7.33 (t,  $J$  = 7.5 Hz, 1H; Ar-H), 7.21-7.11 (m, 5H; Ar-H), 4.26 (q,  $J$  = 7.1 Hz, 4H;  $-\text{C}(\text{COOCH}_2)_2$ ), 3.82 (s, 2H;  $\text{C}(\text{COOEt})_2\text{-CH}_2$ ), 3.77 (s, 2H;  $\text{C}(\text{COOEt})_2\text{-CH}_2$ ), 2.42 (s, 3H; Ar- $\text{CH}_3$ ), 2.32 (s, 3H; Ar- $\text{CH}_3$ ), 1.30 (t,  $J$  = 7.1 Hz, 6H;  $-\text{CH}_3$ ), 0.25 (s, 9H;  $-\text{C}\equiv\text{C-Si}(\text{CH}_3)_3$ ).  $^{13}\text{C NMR}$  (101 MHz,  $\text{CDCl}_3$ )  $\delta$  171.45, 143.58, 142.89, 142.51, 139.33, 138.03, 137.49, 132.37, 132.10, 130.02, 129.48, 128.61, 128.46, 128.24, 127.91, 126.37, 122.92, 119.22, 117.04, 98.53, 92.41, 87.76, 86.70, 78.55, 74.60, 62.04, 59.08, 41.19, 40.59, 21.41 (d,  $J$  = 30.3 Hz), 14.09, 0.02, -0.38. **FT-IR** (KBr):  $\nu$  = 2979, 2196, 1735, 1603, 1463, 1366, 1244, 1183, 1076, 847, 789  $\text{cm}^{-1}$ . **HRMS** (APCI-TOF):  $m/z$  calcd for  $\text{C}_{38}\text{H}_{38}\text{O}_4\text{Si}$   $[\text{M}+\text{Na}]^+$ : 609.2432, found 609.2439.

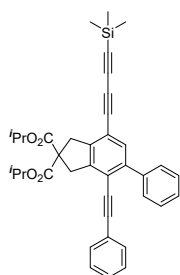

**Diisopropyl 5-phenyl-4-(phenylethynyl)-7-((trimethylsilyl)buta-1,3-diyne-1-yl)-1,3-dihydro-2H-indene-2,2-dicarboxylate (3k)**

White solid; (439 mg, 75% yield); m. p. 145-148 °C; TLC (petroleum ether/EtOAc = 8:1),  $R_f$  = 0.58.  $^1\text{H NMR}$  (400 MHz,  $\text{CDCl}_3$ )  $\delta$  7.59 (d,  $J$  = 6.8 Hz, 2H; Ar-H), 7.44 (t,  $J$  = 6.9 Hz, 2H; Ar-H), 7.40-7.38 (m, 2H; Ar-H), 7.34-7.28 (m, 5H; Ar-H), 5.14-5.04 (m, 2H;  $-\text{C}(\text{COOCH}_2)_2$ ), 3.79 (s, 2H;  $\text{C}(\text{COO}^i\text{Pr})_2\text{-CH}_2$ ), 3.73 (s, 2H;  $\text{C}(\text{COOEt})_2\text{-CH}_2$ ), 1.29 (m, 12H;  $-\text{CH}_3$ ), 0.25 (s, 9H;  $-\text{C}\equiv\text{C-Si}(\text{CH}_3)_3$ ).  $^{13}\text{C NMR}$  (101 MHz,  $\text{CDCl}_3$ )  $\delta$  170.97, 143.77, 142.87, 142.75, 139.48, 132.41, 131.53, 129.29, 128.56, 128.35, 128.00, 127.73, 123.13, 119.19, 117.17, 98.19, 92.41, 87.81, 86.96, 78.59, 74.59, 69.54, 59.14, 41.14, 40.56, 21.61, 21.58, -0.38. **FT-IR** (KBr):  $\nu$  = 2982, 2199, 1723, 1600, 1365, 1253, 1197, 1103, 849, 775, 702  $\text{cm}^{-1}$ . **HRMS** (APCI-TOF):  $m/z$  calcd for  $\text{C}_{38}\text{H}_{38}\text{O}_4\text{Si}$   $[\text{M}+\text{Na}]^+$ : 609.2432, found 609.2441.

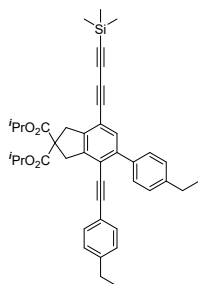

**Diisopropyl 5-(4-ethylphenyl)-4-((4-ethylphenyl)ethynyl)-7-((trimethylsilyl)buta-1,3-diyn-1-yl)-1,3-dihydro-2H-indene-2,2-dicarboxylate (3l)**

White solid; (469 mg, 73% yield); m. p. 116-118 °C; TLC (petroleum ether/EtOAc = 8:1):  $R_f$  = 0.85.  $^1\text{H NMR}$  (400 MHz,  $\text{CDCl}_3$ )  $\delta$  7.5 (d,  $J$  = 8.2, 2H; Ar-H), 7.39 (s, 1H; Ar-H), 7.29-7.26 (m, 4H; Ar-H), 7.14 (d,  $J$  = 8.1, 2H; Ar-H), 5.14-5.05 (m, 2H;  $-\text{C}(\text{COO}^i\text{Pr})_2$ ), 3.79 (s, 2H;  $\text{C}(\text{COO}^i\text{Pr})_2\text{-CH}_2$ ), 3.73 (s, 2H;  $\text{C}(\text{COO}^i\text{Pr})_2\text{-CH}_2$ ), 2.72 (q,  $J$  = 7.6 Hz, 2H; Ar- $\text{CH}_2$ ), 2.64 (q,  $J$  = 7.6 Hz, 2H; Ar- $\text{CH}_2$ ), 1.32-1.28 (m, 12H;  $-\text{CH}_3$ ), 1.27-1.20 (m, 6H;  $-\text{CH}_3$ ), 0.25 (s, 9H;  $-\text{C}\equiv\text{C-Si}(\text{CH}_3)_3$ ).  $^{13}\text{C NMR}$  (101 MHz,  $\text{CDCl}_3$ )  $\delta$  171.02, 145.06, 143.70 (d,  $J$  = 12.1 Hz), 142.66, 142.44, 136.82, 132.35, 131.54, 129.21, 127.92, 127.50, 120.40, 119.37, 116.85, 98.45, 92.23, 87.86, 86.56, 78.35, 74.76, 69.50, 59.10, 41.15, 40.54, 28.79 (d,  $J$  = 23.2 Hz), 21.61, 21.59, 15.53 (d,  $J$  = 10.1 Hz), 0.04, -0.36. **FT-IR** (KBr):  $\nu$  = 2965, 2202, 1727, 1607, 1512, 1373, 1258, 1198, 1104, 802  $\text{cm}^{-1}$ . **HRMS** (APCI-TOF):  $m/z$  calcd for  $\text{C}_{42}\text{H}_{46}\text{O}_4\text{Si}$   $[\text{M}+\text{Na}]^+$ : 665.3058, found 665.3061.

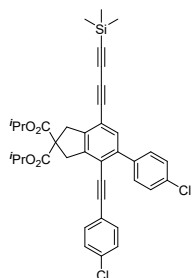

**Diisopropyl 5-(4-chlorophenyl)-4-((4-chlorophenyl)ethynyl)-7-((trimethylsilyl)buta-1,3-diyn-1-yl)-1,3-dihydro-2H-indene-2,2-dicarboxylate (3m)**

White solid; (518 mg, 79% yield); m. p. 209-212 °C; TLC (petroleum ether/EtOAc = 8:1):  $R_f$  = 0.79.  $^1\text{H NMR}$  (400 MHz,  $\text{CDCl}_3$ )  $\delta$  7.53-7.49 (m, 2H; Ar-H), 7.42-7.38 (m, 2H; Ar-H), 7.34 (s, 1H; Ar-H), 7.31-7.29 (m, 3H; Ar-H), 7.26-7.25 (m, 1H; Ar-H), 5.14-5.04 (m, 2H;  $-\text{C}(\text{COO}^i\text{Pr})_2$ ), 3.76 (s, 2H;  $\text{C}(\text{COO}^i\text{Pr})_2\text{-CH}_2$ ), 3.72 (s, 2H;  $\text{C}(\text{COO}^i\text{Pr})_2\text{-CH}_2$ ), 1.29 (m, 12H;  $-\text{CH}_3$ ), 0.25 (s, 9H;  $-\text{C}\equiv\text{C-Si}(\text{CH}_3)_3$ ).  $^{13}\text{C NMR}$  (101 MHz,  $\text{CDCl}_3$ )  $\delta$  170.88, 143.99, 143.16, 141.57, 137.84, 134.79, 133.83 (d,  $J$  = 8.1 Hz), 132.70, 132.25, 130.56, 128.81, 128.23, 121.32, 118.65, 117.59, 97.21, 92.78, 87.63, 87.50, 78.93, 74.21, 69.87, 69.63, 59.09, 41.06, 40.52, 21.60, 21.58, 21.51, 1.05, -0.4. **FT-IR** (KBr):  $\nu$  = 2981, 2102, 1729, 1608, 1493, 1365, 1254, 1194, 1100, 927, 858  $\text{cm}^{-1}$ . **HRMS** (APCI-TOF):  $m/z$  calcd for  $\text{C}_{38}\text{H}_{36}\text{Cl}_2\text{O}_4\text{Si}$   $[\text{M}+\text{Na}]^+$ : 677.1652, found 677.1651.

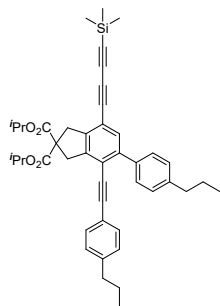

**Diisopropyl 5-(4-propylphenyl)-4-((4-propylphenyl)ethynyl)-7-((trimethylsilyl)buta-1,3-diyne-1-yl)-1,3-dihydro-2H-indene-2,2-dicarboxylate (3n)**

White solid; (470mg, 70% yield); m. p. 120-124 °C; TLC (petroleum ether/EtOAc = 8:1):  $R_f$  = 0.84.  $^1\text{H NMR}$  (400 MHz,  $\text{CDCl}_3$ )  $\delta$  7.51 (d,  $J$  = 7.8 Hz, 2H; Ar-H), 7.38 (s, 1H; Ar-H), 7.26 (s, 1H; Ar-H), 7.24 (d,  $J$  = 6.2 Hz, 3H; Ar-H), 7.11 (d,  $J$  = 8.0 Hz, 2H; Ar-H), 5.13-5.04 (m, 2H; -C(COOCH)<sub>2</sub>), 3.78 (s, 2H; C(COO<sup>*i*</sup>Pr)<sub>2</sub>-CH<sub>2</sub>), 3.72 (s, 2H; C(COO<sup>*i*</sup>Pr)<sub>2</sub>-CH<sub>2</sub>), 2.65 (t,  $J$  = 7.6 Hz, 2H; -CH<sub>2</sub>), 2.57 (t,  $J$  = 7.6 Hz, 2H; -CH<sub>2</sub>), 1.75-1.67 (m, 2H; -CH<sub>2</sub>-), 1.67-1.57 (m, 2H; -CH<sub>2</sub>-), 1.29-1.27 (m, 12H; -CH<sub>3</sub>), 0.99 (t,  $J$  = 7.3 Hz, 3H; -CH<sub>3</sub>), 0.92 (t,  $J$  = 7.3 Hz, 3H; -CH<sub>3</sub>), 0.25 (s, 9H; -C≡C-Si(CH<sub>3</sub>)<sub>3</sub>).  $^{13}\text{C NMR}$  (101 MHz,  $\text{CDCl}_3$ )  $\delta$  171.01, 143.54 (d,  $J$  = 5.1 Hz), 142.73, 142.43, 142.19, 136.84, 132.33, 131.43, 129.12, 128.51, 128.08, 120.40, 119.39, 116.83, 98.45, 92.21, 87.86, 86.62, 78.35, 74.76, 71.57, 71.44, 69.81, 69.48, 59.11, 41.14, 40.54, 37.92 (d,  $J$  = 18.2 Hz), 31.46, 30.20, 29.73, 24.49 (d,  $J$  = 18.2 Hz), 21.59 (d,  $J$  = 2.0 Hz), 21.52, 13.90, 13.77, 1.05, -0.37. **FT-IR** (KBr):  $\nu$  = 2963, 2197, 1728, 1609, 1461, 1372, 1261, 1194, 1101, 801  $\text{cm}^{-1}$ . **HRMS** (APCI-TOF):  $m/z$  calcd for  $\text{C}_{44}\text{H}_{50}\text{O}_4\text{Si}$  [ $\text{M}+\text{Na}$ ]<sup>+</sup>: 693.3371, found 693.3384.

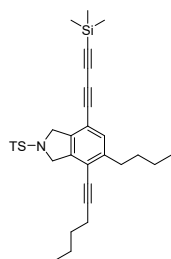

**5-Butyl-4-(hex-1-yn-1-yl)-2-tosyl-7-((trimethylsilyl)buta-1,3-diyne-1-yl)isoindoline (3o)**

Yellow solid; (355 mg, 67% yield); m. p. 114-120 °C; TLC (petroleum ether/EtOAc = 8:1):  $R_f$  = 0.61.  $^1\text{H NMR}$  (400 MHz,  $\text{CDCl}_3$ )  $\delta$  7.79 (d,  $J$  = 8.0, 2H; Ar-H), 7.33 (d,  $J$  = 8.0 Hz, 2H; Ar-H), 7.14 (s, 1H; Ar-H), 4.63 (d,  $J$  = 6.4, 4H; Ts-N(CH<sub>2</sub>)<sub>2</sub>), 2.65 (t,  $J$  = 7.7, 2H; Ar-CH<sub>2</sub>), 2.47 (t,  $J$  = 6.9, 2H; -C≡C-CH<sub>2</sub>), 2.41 (s, 3H; Ar-CH<sub>3</sub>), 1.63-1.56 (m, 4H; -CH<sub>2</sub>), 1.53-1.44 (m, 4H; -CH<sub>2</sub>), 1.36-1.27 (m, 2H; -CH<sub>2</sub>), 0.96 (t,  $J$  = 7.3 Hz, 3H; -CH<sub>3</sub>), 0.90 (t,  $J$  = 7.3 Hz, 3H; -CH<sub>3</sub>), 0.25 (s, 9H; -C≡C-Si(CH<sub>3</sub>)<sub>3</sub>).  $^{13}\text{C NMR}$  (101 MHz,  $\text{CDCl}_3$ )  $\delta$  144.99, 144.19, 139.38, 137.54 (d,  $J$  = 9.1 Hz), 134.12, 132.51 (d,  $J$  = 18.2 Hz), 130.38, 128.06, 120.15, 114.94 (d,  $J$  = 33.3 Hz), 101.88, 87.69, 76.22, 73.83, 73.60, 71.44, 68.10, 54.80 (d,  $J$  = 40.4 Hz), 34.06, 33.04 (d,  $J$  = 3.0 Hz), 31.14, 22.84, 22.42, 21.99, 19.87, 14.19 (d,  $J$  = 29.3 Hz), 1.47, 0.45. **FT-IR**

(KBr):  $\nu = 2961, 1603, 1359, 1165, 1096, 813, 667, 546 \text{ cm}^{-1}$ . **HRMS** (APCI-TOF):  $m/z$  calcd for  $\text{C}_{32}\text{H}_{39}\text{NO}_2\text{SSi}$   $[\text{M}+\text{Na}]^+$ : 552.2363, found 552.2369.

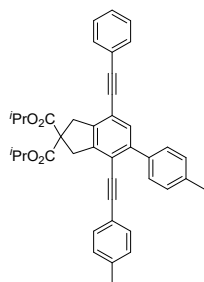

**Diisopropyl 7-(phenylethynyl)-5-(p-tolyl)-4-(p-tolylolethynyl)-1,3-dihydro-2H-indene-2,2-dicarboxylate (6a)**

White solid; (446 mg, 75% yield); m. p. 141-149 °C; TLC (petroleum ether/EtOAc = 8:1):  $R_f = 0.38$ .  **$^1\text{H}$  NMR** (400 MHz,  $\text{CDCl}_3$ )  $\delta$  7.61-7.57 (m, 2H; Ar-H), 7.54 (d,  $J = 8.0$  Hz, 1H; Ar-H), 7.45 (s, 1H; Ar-H), 7.40-7.38 (m, 2H; Ar-H), 7.32-7.29 (m, 2H; Ar-H), 7.27-7.24 (m, 3H; Ar-H), 7.20 (d,  $J = 8.1$  Hz, 1H; Ar-H), 7.16-7.10 (m, 2H; Ar-H), 5.16-5.09 (m, 2H;  $-\text{C}(\text{COOCH}_2)_2$ ), 3.86-3.68 (m, 4H;  $\text{C}(\text{COO}^i\text{Pr})_2-\text{CH}_2$ ), 2.46 (d,  $J = 10.1$  Hz, 3H; Ar- $\text{CH}_3$ ), 2.37 (d,  $J = 7.8$  Hz, 3H; Ar- $\text{CH}_3$ ), 1.31 (t,  $J = 5.7$  Hz, 12H;  $-\text{CH}_3$ ).  **$^{13}\text{C}$  NMR** (101 MHz,  $\text{CDCl}_3$ )  $\delta$  171.13 (d,  $J = 12.1$  Hz), 144.89, 143.50, 142.61, 140.84, 138.89, 138.55, 137.25, 137.00 (d,  $J = 4.0$  Hz), 131.74, 131.37 (d,  $J = 4.0$  Hz), 130.44, 129.21, 129.10, 129.01, 128.47 (d,  $J = 8.1$  Hz), 128.20, 128.01, 123.54, 123.19, 120.36 (d,  $J = 6.1$  Hz), 119.74, 119.00, 118.11, 89.56, 87.42, 86.75, 86.29, 69.42 (d,  $J = 5.1$  Hz), 59.78, 59.20, 41.32, 40.96, 40.63 (d,  $J = 7.1$  Hz), 21.57 (d,  $J = 6.1$  Hz), 21.39 (d,  $J = 15.2$  Hz). **FT-IR** (KBr):  $\nu = 2980, 1728, 1599, 1511, 1465, 1373, 1245, 1181, 1103, 815, 754 \text{ cm}^{-1}$ . **HRMS** (APCI-TOF):  $m/z$  calcd for  $\text{C}_{41}\text{H}_{38}\text{O}_4$   $[\text{M}+\text{Na}]^+$ : 617.2662, found 617.2665.

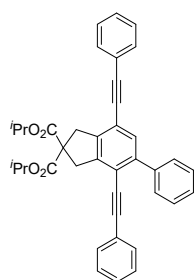

**Diisopropyl 5-phenyl-4,7-bis(phenylethynyl)-1,3-dihydro-2H-indene-2,2-dicarboxylate (6b)**

Light yellow liquid; (431 mg, 76% yield); TLC (petroleum ether/EtOAc = 8:1):  $R_f = 0.42$ .  **$^1\text{H}$  NMR** (400 MHz,  $\text{CDCl}_3$ )  $\delta$  7.68-7.55 (m, 3H; Ar-H), 7.50-7.44 (m, 4H; Ar-H), 7.36 (s, 1H; Ar-H), 7.30-7.26 (m, 2H; Ar-H), 7.25-7.23 (m, 4H; Ar-H), 7.18 (s, 2H; Ar-H), 5.12-5.08 (m, 2H;  $-\text{C}(\text{COOCH}_2)_2$ ), 3.85-3.66 (m, 4H;  $\text{C}(\text{COO}^i\text{Pr})_2-\text{CH}_2$ ), 1.30-1.27 (m, 12H;  $-\text{CH}_3$ ).  **$^{13}\text{C}$  NMR** (101 MHz,  $\text{CDCl}_3$ )  $\delta$  171.06 (d,  $J = 12.1$  Hz), 145.16, 143.42, 141.11, 139.11 (d,  $J = 8.1$  Hz), 131.71, 131.44, 131.30, 130.49, 129.34, 128.40, 128.36, 128.27 (d,  $J = 3.0$  Hz), 128.19 (d,  $J = 4.0$  Hz), 128.01, 127.91, 127.45 (d,  $J = 6.1$  Hz), 127.34, 123.29 (d,

$J = 12.1$  Hz), 121.93, 119.49, 96.40, 92.21, 89.25, 86.69, 69.44, 69.40, 59.75, 40.70 (d,  $J = 30.3$  Hz), 21.56. **FT-IR** (KBr):  $\nu = 2979, 1727, 1597, 1492, 1442, 1280, 1196, 1104, 901, 756, 690$   $\text{cm}^{-1}$ . **HRMS** (APCI-TOF):  $m/z$  calcd for  $\text{C}_{39}\text{H}_{34}\text{O}_4$   $[\text{M}+\text{Na}]^+$ : 589.2349, found 589.2354.

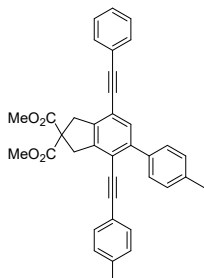

**Dimethyl 7-(phenylethynyl)-5-(p-tolyl)-4-(p-tolylolethynyl)-1,3-dihydro-2H-indene-2,2-dicarboxylate (6c)**

White solid; (380 mg, 71% yield); m. p. 159-162°C; TLC (petroleum ether/EtOAc = 8:1):  $R_f = 0.37$ .  **$^1\text{H}$  NMR** (400 MHz,  $\text{CDCl}_3$ )  $\delta$  7.50 (d,  $J = 8.0$  Hz, 2H; Ar-H), 7.43 (s, 1H; Ar-H), 7.27-7.20 (m, 7H; Ar-H), 7.16 (d,  $J = 8.2$  Hz, 2H; Ar-H), 7.08 (d,  $J = 7.7$  Hz, 2H; Ar-H), 3.82 (s, 2H;  $\text{C}(\text{COOMe})_2\text{-CH}_2$ ), 3.79 (s, 6H;  $-\text{C}(\text{COOCH}_3)_2$ ), 3.68 (s, 2H;  $\text{C}(\text{COOMe})_2\text{-CH}_2$ ), 2.44 (s, 3H; Ar- $\text{CH}_3$ ), 2.33 (s, 3H; Ar- $\text{CH}_3$ ).  **$^{13}\text{C}$  NMR** (101 MHz,  $\text{CDCl}_3$ )  $\delta$  171.93, 144.91, 143.13, 138.53 (d,  $J = 12.1$  Hz), 137.05, 135.89, 131.34 (d,  $J = 3.0$  Hz), 130.37, 128.99, 128.17, 128.00, 127.44, 123.45, 122.02, 120.20 (d,  $J = 6.1$  Hz), 119.73, 96.67, 92.06, 89.41, 86.17, 59.67, 53.16, 40.90 (d,  $J = 45.5$  Hz), 21.48 (d,  $J = 9.1$  Hz). **FT-IR** (KBr):  $\nu = 2953, 1736, 1599, 1511, 1440, 1364, 1240, 1154, 1070, 817, 759$   $\text{cm}^{-1}$ . **HRMS** (APCI-TOF):  $m/z$  calcd for  $\text{C}_{37}\text{H}_{30}\text{O}_4$   $[\text{M}+\text{Na}]^+$ : 561.2036, found 561.2045.

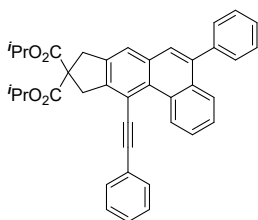

**Diisopropyl 5-phenyl-11-(phenylethynyl)-8,10-dihydro-9H-cyclopenta[b]phenanthrene-9,9-dicarboxylate (8b)**

White solid; (442 mg, 78% yield); m. p. 142-143 °C; TLC (petroleum ether/EtOAc = 8:1):  $R_f = 0.29$ .  **$^1\text{H}$  NMR** (400 MHz,  $\text{CDCl}_3$ ): 10.46 (d,  $J = 8.6$  Hz, 1H; Ar-H), 7.91 (d,  $J = 8.2$  Hz, 1H; Ar-H), 7.73-7.69 (m, 3H; Ar-H), 7.68-7.65 (m, 1H; Ar-H), 7.61 (s, 1H; Ar-H), 7.57-7.50 (m, 5H; Ar-H), 7.48-7.46 (m, 2H; Ar-H), 7.45-7.40 (m, 2H; Ar-H), 5.15-5.06 (m, 2H;  $-\text{C}(\text{COO}^i\text{Pr})_2$ ), 4.03 (s, 2H;  $\text{C}(\text{COO}^i\text{Pr})_2\text{-CH}_2$ ), 3.83 (s, 2H;  $\text{C}(\text{COO}^i\text{Pr})_2\text{-CH}_2$ ), 1.43-1.26 (m, 12H;  $-\text{CH}_3$ ).  **$^{13}\text{C}$  NMR** (101 MHz,  $\text{CDCl}_3$ )  $\delta$  171.14, 145.80, 140.74, 138.70 (d,  $J = 13.1$  Hz), 132.36, 131.86, 131.45, 131.20, 130.06, 128.59 (d,  $J = 4.0$  Hz), 128.36, 128.07, 127.40, 126.55 (d,  $J = 8.1$  Hz), 126.21, 125.62, 124.47, 123.79, 114.83, 99.67, 89.96, 77.37, 77.05, 76.73,

69.35, 59.86, 41.79, 40.77, 29.74, 21.60. **FT-IR** (KBr):  $\nu = 2984, 1726, 1599, 1361, 1253, 1193, 1104, 1067, 897, 772 \text{ cm}^{-1}$ . **HRMS** (APCI-TOF):  $m/z$  calcd for  $\text{C}_{39}\text{H}_{34}\text{O}_4$   $[\text{M}+\text{Na}]^+$ : 589.2349, found 589.2353.

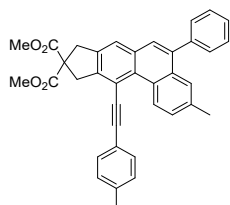

**Dimethyl 3-methyl-5-phenyl-11-(p-tolyethynyl)-8,10-dihydro-9H-cyclopenta[b]phenanthrene-9,9-dicarboxylate (8c)**

White solid; (388 mg, 72% yield); m. p. 158-160 °C; TLC (petroleum ether/EtOAc = 8:1):  $R_f = 0.22$ .  **$^1\text{H}$  NMR** (400 MHz,  $\text{CDCl}_3$ ): 10.35 (d,  $J = 8.7$  Hz, 1H; Ar-H), 7.66 (s, 2H; Ar-H), 7.60 (d,  $J = 7.6$  Hz, 2H; Ar-H), 7.56 (s, 1H; Ar-H), 7.53-7.46 (m, 6H; Ar-H), 7.26 (d,  $J = 8.0$  Hz, 2H; Ar-H), 4.04 (s, 2H;  $\text{C}(\text{COOMe})_2\text{-CH}_2$ ), 3.84 (s, 2H;  $\text{C}(\text{COOMe})_2\text{-CH}_2$ ), 3.79 (s, 6H;  $-\text{C}(\text{COOCH}_3)_2$ ), 2.44 (d,  $J = 12.9$  Hz, 6H; Ar- $\text{CH}_3$ ).  **$^{13}\text{C}$  NMR** (101 MHz,  $\text{CDCl}_3$ )  $\delta$  172.14, 145.13, 140.90, 138.81, 138.55, 137.78, 136.35, 132.04, 132.00, 131.34, 130.02 (d,  $J = 4.0$  Hz), 129.37, 129.08, 128.68, 128.24 (d,  $J = 22.2$  Hz), 127.34, 126.11, 124.26, 120.68, 114.83, 99.98, 89.37, 59.75, 53.17, 41.95, 40.91, 21.65. **FT-IR** (KBr):  $\nu = 2952, 1729, 1600, 1362, 1266, 1162, 1072, 967, 821, 774, 701 \text{ cm}^{-1}$ . **HRMS** (APCI-TOF):  $m/z$  calcd for  $\text{C}_{37}\text{H}_{30}\text{O}_4$   $[\text{M}+\text{Na}]^+$ : 561.2036, found 561.2039.

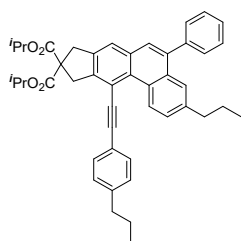

**Diisopropyl 5-phenyl-3-propyl-11-((4-propylphenyl)ethynyl)-8,10-dihydro-9H-cyclopenta[b]phenanthrene-9,9-dicarboxylate (8d)**

White solid; (482 mg, 74% yield); m. p. 151-153 °C; TLC (petroleum ether/EtOAc = 8:1):  $R_f = 0.33$ .  **$^1\text{H}$  NMR** (400 MHz,  $\text{CDCl}_3$ ): 10.40 (d,  $J = 8.7$  Hz, 1H; Ar-H), 7.68-7.61 (m, 4H; Ar-H), 7.56-7.48 (m, 6H; Ar-H), 7.46-7.42 (m, 1H; Ar-H), 7.26 (d,  $J = 7.8$  Hz, 2H; Ar-H), 5.13-5.04 (m, 2H;  $-\text{C}(\text{COO}^i\text{Pr})_2$ ), 4.01 (s, 2H;  $\text{C}(\text{COO}^i\text{Pr})_2\text{-CH}_2$ ), 3.80 (s, 2H;  $\text{C}(\text{COO}^i\text{Pr})_2\text{-CH}_2$ ), 2.71-2.63 (m, 4H; Ar- $\text{CH}_2$ ), 1.73-1.62 (m, 4H;  $-\text{CH}_2-$ ), 1.27 (d,  $J = 6.4$  Hz, 12H;  $-\text{CH}_3$ ), 1.00-0.92 (m, 6H;  $-\text{CH}_3$ ).  **$^{13}\text{C}$  NMR** (101 MHz,  $\text{CDCl}_3$ )  $\delta$  171.22, 145.59, 143.52, 141.03, 138.58, 138.15, 132.06 (d,  $J = 15.2$  Hz), 131.37, 130.08, 129.43, 128.74 (d,  $J = 13.1$  Hz), 128.29 (d,  $J = 15.2$  Hz), 127.32, 126.63, 126.20, 125.67, 124.29, 121.13, 114.81, 99.93, 89.55, 69.32, 59.91, 41.85, 40.82, 38.13 (d,  $J = 4.0$  Hz), 24.58 (d,  $J = 15.2$  Hz), 21.62, 13.93 (d,  $J = 10.1$  Hz).

**FT-IR** (KBr):  $\nu = 2959, 1729, 1603, 1510, 1368, 1254, 1190, 1104, 775 \text{ cm}^{-1}$ . **HRMS** (APCI-TOF):  $m/z$  calcd for  $\text{C}_{45}\text{H}_{46}\text{O}_4$   $[\text{M}+\text{Na}]^+$ : 673.3288, found 673.3293.

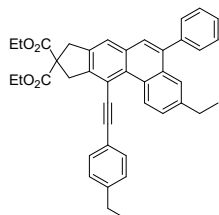

**Diethyl 3-ethyl-11-((4-ethylphenyl)ethynyl)-5-phenyl-8,10-dihydro-9H-cyclopenta[b]phenanthrene-9,9-dicarboxylate (8e)**

White solid; (451 mg, 76% yield); m. p. 125-128 °C; TLC (petroleum ether/EtOAc = 8:1):  $R_f = 0.28$ .  **$^1\text{H}$  NMR** (400 MHz,  $\text{CDCl}_3$ )  $\delta$  10.39 (d,  $J = 8.8$  Hz, 1H; Ar-H), 7.69 (s, 1H; Ar-H), 7.66 (s, 1H; Ar-H), 7.63 (d,  $J = 8.2$  Hz, 2H; Ar-H), 7.57 (s, 1H; Ar-H), 7.54-7.52 (m, 5H; Ar-H), 7.50-7.46 (m, 1H; Ar-H), 7.29 (d,  $J = 8.1$  Hz, 2H; Ar-H), 4.25 (q,  $J = 7.1$  Hz, 4H;  $-\text{C}(\text{COOCH}_2)_2$ ), 4.03 (s, 2H;  $\text{C}(\text{COOEt})_2\text{-CH}_2$ ), 3.84 (s, 2H;  $\text{C}(\text{COOEt})_2\text{-CH}_2$ ), 2.79-2.70 (m, 4H; Ar- $\text{CH}_2$ ), 1.31-1.24 (m, 12H;  $-\text{CH}_3$ ).  **$^{13}\text{C}$  NMR** (101 MHz,  $\text{CDCl}_3$ )  $\delta$  171.68, 145.37, 145.06, 142.54, 140.94, 138.59, 137.96, 132.01 (d,  $J = 7.1$  Hz), 131.44, 130.03, 129.33, 128.65, 128.23 (d,  $J = 15.2$  Hz), 127.29, 126.16 (d,  $J = 18.2$  Hz), 124.96, 124.24, 121.00, 114.79, 99.91, 89.40, 77.35, 77.03, 76.71, 61.88, 59.81, 41.85, 40.82, 28.94, 15.55 (d,  $J = 14.1$  Hz), 14.07. **FT-IR** (KBr):  $\nu = 2963, 1730, 1600, 1366, 1247, 1186, 1150, 1071, 832, 774, 704 \text{ cm}^{-1}$ . **HRMS** (APCI-TOF):  $m/z$  calcd for  $\text{C}_{41}\text{H}_{38}\text{O}_4$   $[\text{M}+\text{Na}]^+$ : 617.2662, found 617.2666.

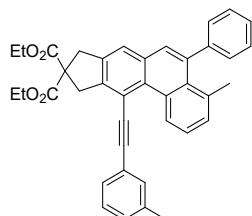

**Diethyl 4-methyl-5-phenyl-11-(m-tolyethynyl)-8,10-dihydro-9H-cyclopenta[b]phenanthrene-9,9-dicarboxylate (8f)**

White solid; (414 mg, 73% yield); m. p. 120-123 °C; TLC (petroleum ether/EtOAc = 8:1):  $R_f = 0.29$ .  **$^1\text{H}$  NMR** (400 MHz,  $\text{CDCl}_3$ ): 10.32 (t,  $J = 8.6$  Hz, 1H; Ar-H), 7.64 (d,  $J = 21.52$  Hz, 1H; Ar-H), 7.57-7.49 (m, 5H; Ar-H), 7.46-7.36 (m, 5H; Ar-H), 7.35-7.31 (m, 1H; Ar-H), 7.22 (d,  $J = 7.6$  Hz, 1H; Ar-H), 4.29-4.23 (m, 4H;  $-\text{C}(\text{COOCH}_2)_2$ ), 4.05 (d,  $J = 6.2$  Hz, 2H;  $\text{C}(\text{COOEt})_2\text{-CH}_2$ ), 3.84 (d,  $J = 5.0$  Hz, 2H;  $\text{C}(\text{COOMe})_2\text{-CH}_2$ ), 2.63 (s, 1H; Ar- $\text{CH}_3$ ), 2.43 (s, 3H; Ar- $\text{CH}_3$ ), 2.05 (s, 2H; Ar- $\text{CH}_3$ ), 1.31-1.25 (m, 6H;  $-\text{CH}_3$ ).  **$^{13}\text{C}$  NMR** (101 MHz,  $\text{CDCl}_3$ )  $\delta$  171.68, 145.65, 145.17, 140.88, 138.53, 138.31 (d,  $J = 5.1$  Hz), 135.40, 132.35, 131.99 (d,  $J = 4.0$  Hz), 131.59, 130.86, 130.64 (d,  $J = 9.1$  Hz), 130.03, 129.40 (d,  $J = 9.1$  Hz), 129.20, 128.52 (d,  $J = 10.1$  Hz), 128.32, 127.91, 127.34, 126.77, 126.45, 126.15, 125.06, 124.74,



123.83, 123.61, 114.96 (d,  $J = 14.1$  Hz), 99.92 (d,  $J = 5.1$  Hz), 89.75 (d,  $J = 12.1$  Hz), 61.93, 59.82 (d,  $J = 4.0$  Hz), 41.91 (d,  $J = 11.1$  Hz), 40.81 (d,  $J = 4.0$  Hz), 25.73, 22.24, 21.38, 14.10, 1.05. **FT-IR** (KBr):  $\nu = 2980, 1730, 1596, 1446, 1365, 1252, 1190, 1073, 776, 705$   $\text{cm}^{-1}$ . **HRMS** (APCI-TOF):  $m/z$  calcd for  $\text{C}_{39}\text{H}_{34}\text{O}_4$   $[\text{M}+\text{Na}]^+$ : 589.2349, found 589.2351.

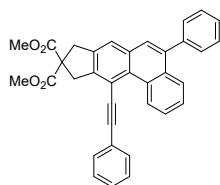

**Dimethyl 5-phenyl-11-(phenylethynyl)-8,10-dihydro-9H-cyclopenta[b]phenanthrene-9,9-dicarboxylate (8g)**

White solid; (419 mg, 82% yield); m. p. 167-170 °C; TLC (petroleum ether/EtOAc = 8:1):  $R_f = 0.32$ .  **$^1\text{H}$  NMR** (400 MHz,  $\text{CDCl}_3$ )  $\delta$  10.45 (d,  $J = 8.6$  Hz, 1H; Ar-H), 7.90 (d,  $J = 8.2$  Hz, 1H; Ar-H), 7.73-7.68 (m, 3H; Ar-H), 7.67-7.64 (m, 1H; Ar-H), 7.60 (s, 1H; Ar-H), 7.56-7.49 (m, 5H; Ar-H), 7.48-7.42 (m, 4H; Ar-H), 4.06 (s, 2H;  $\text{C}(\text{COOMe})_2\text{-CH}_2$ ), 3.86 (s, 2H;  $\text{C}(\text{COOMe})_2\text{-CH}_2$ ), 3.80 (s, 6H;  $-\text{C}(\text{COOCH}_3)_2$ ).  **$^{13}\text{C}$  NMR** (101 MHz,  $\text{CDCl}_3$ )  $\delta$  172.08, 145.42, 140.69, 138.90, 138.30, 132.42, 131.89, 131.48, 131.18, 130.05, 128.64 (d,  $J = 4.0$  Hz), 128.36, 128.00, 127.43, 126.60 (d,  $J = 5.1$  Hz), 126.19, 125.67, 124.50, 123.68, 114.91, 99.88, 89.87, 59.75, 53.18, 41.97, 40.92. **FT-IR** (KBr):  $\nu = 2951, 1737, 1599, 1434, 1364, 1252, 1152, 1071, 774, 697$   $\text{cm}^{-1}$ . **HRMS** (APCI-TOF):  $m/z$  calcd for  $\text{C}_{35}\text{H}_{26}\text{O}_4$   $[\text{M}+\text{Na}]^+$ : 533.1723, found 533.1726.

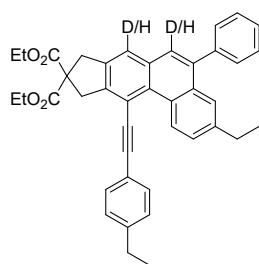

**8e+ $\text{CD}_3\text{CN}$**

**$^1\text{H}$  NMR** (400 MHz,  $\text{CDCl}_3$ )  $\delta$  10.39 (d,  $J = 8.8$  Hz, 1H; Ar-H), 7.69 (s, 1H; Ar-H), 7.66 (s, 0.47H; Ar-H), 7.63 (d,  $J = 8.2$  Hz, 2H; Ar-H), 7.57 (s, 0.24H; Ar-H), 7.54-7.52 (m, 5H; Ar-H), 7.50-7.46 (m, 1H; Ar-H), 7.29 (d,  $J = 8.1$  Hz, 2H; Ar-H), 4.25 (q,  $J = 7.0$  Hz, 4H;  $-\text{C}(\text{COOCH}_2)_2$ ), 4.03 (s, 2H;  $\text{C}(\text{COOEt})_2\text{-CH}_2$ ), 3.84 (s, 2H;  $\text{C}(\text{COOEt})_2\text{-CH}_2$ ), 2.79-2.70 (m, 4H; Ar- $\text{CH}_2$ ), 1.32-1.24 (m, 12H;  $-\text{CH}_3$ ).

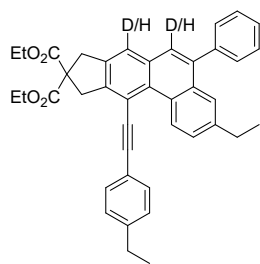

### 8e+D<sub>2</sub>O

<sup>1</sup>H NMR (400 MHz, CDCl<sub>3</sub>) δ 10.39 (d, *J* = 8.7 Hz, 1H; Ar-H), 7.69 (s, 1H; Ar-H), 7.66 (s, 0.6H; Ar-H), 7.63 (d, *J* = 7.9 Hz, 2H; Ar-H), 7.57 (s, 0.36H; Ar-H), 7.54-7.52 (m, 5H; Ar-H), 7.50-7.46 (m, 1H; Ar-H), 7.29 (d, *J* = 7.9 Hz, 2H; Ar-H), 4.25 (q, *J* = 7.1 Hz, 4H; -C(COOCH<sub>2</sub>)<sub>2</sub>), 4.03 (s, 2H; C(COOEt)<sub>2</sub>-CH<sub>2</sub>), 3.84 (s, 2H; C(COOEt)<sub>2</sub>-CH<sub>2</sub>), 2.79-2.70 (m, 4H; Ar-CH<sub>2</sub>), 1.31-1.24 (m, 12H; -CH<sub>3</sub>).

### 3. X-Ray Structure for 3l, 3o, 6c and 8g

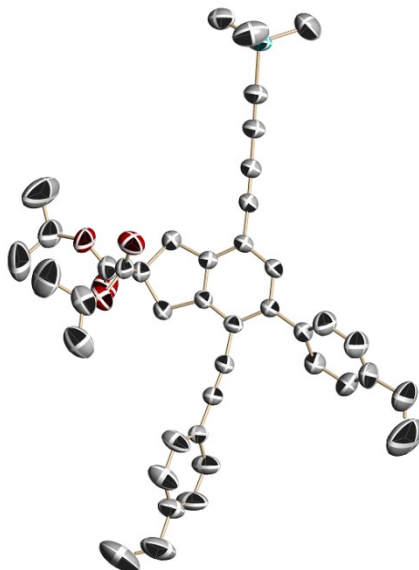

3l

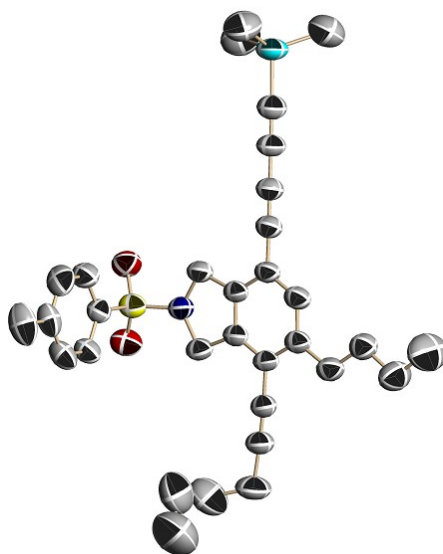

3o

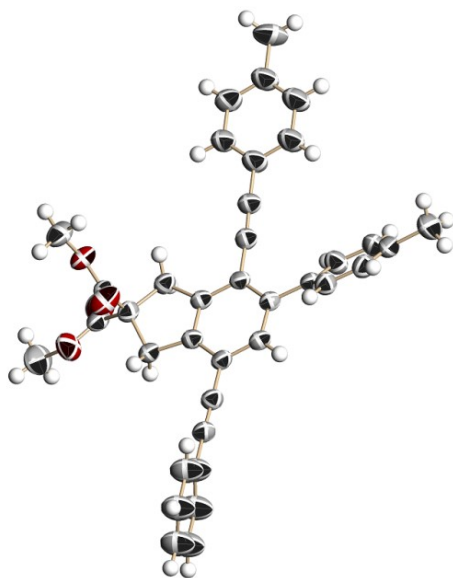

6c

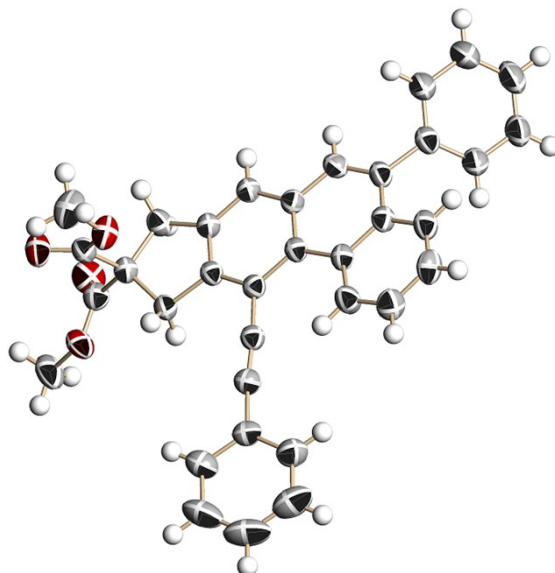

8g

All X-Ray structures were tested at room temperature. The low quality of X-ray diffraction data which led to high R values and low bond precision.

## 4. <sup>1</sup>H NMR & <sup>13</sup>C NMR Spectra for New Compounds

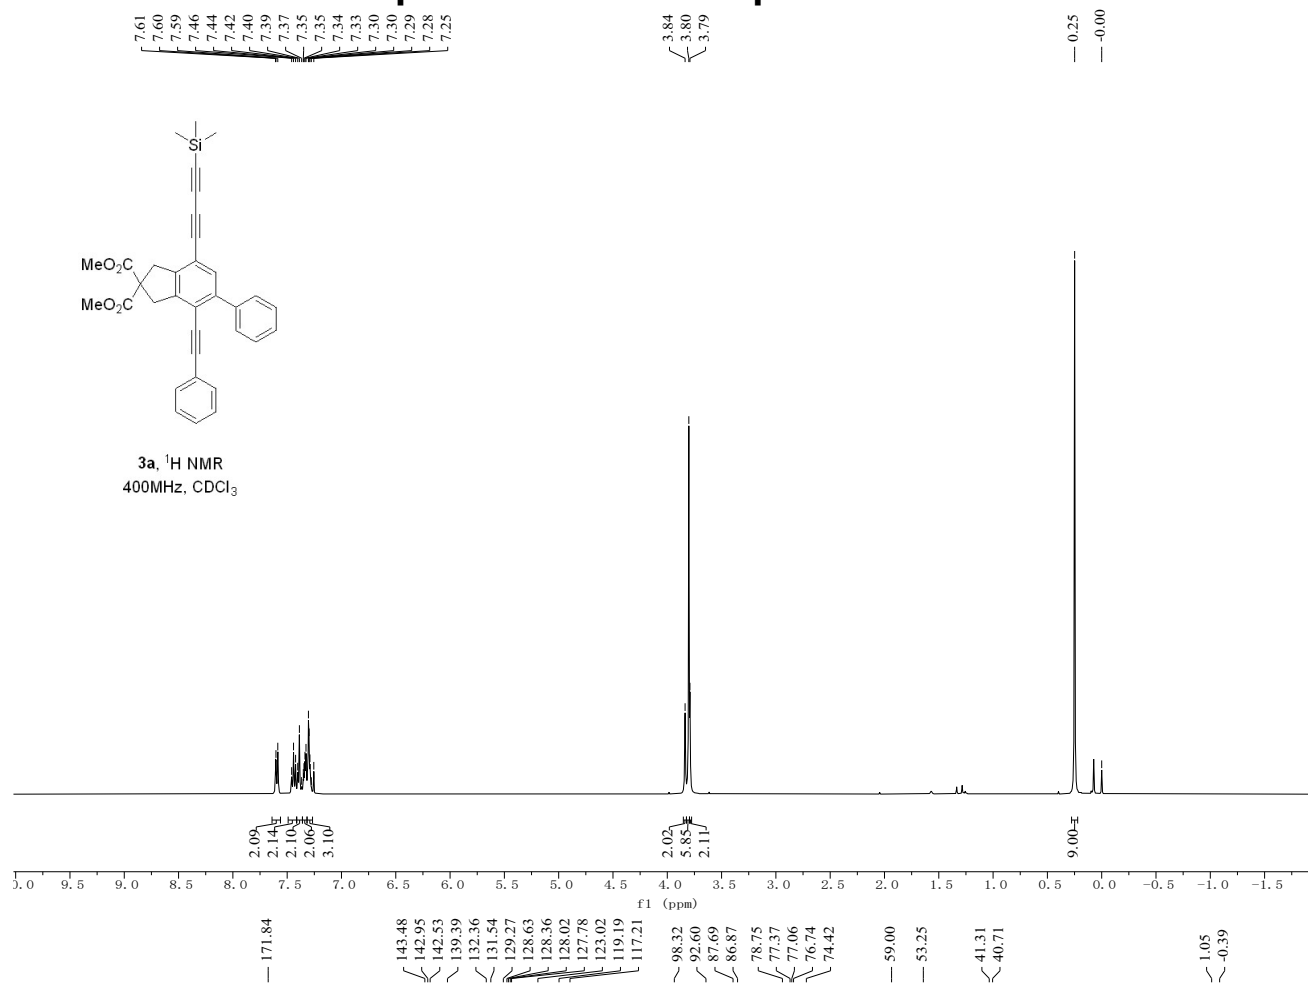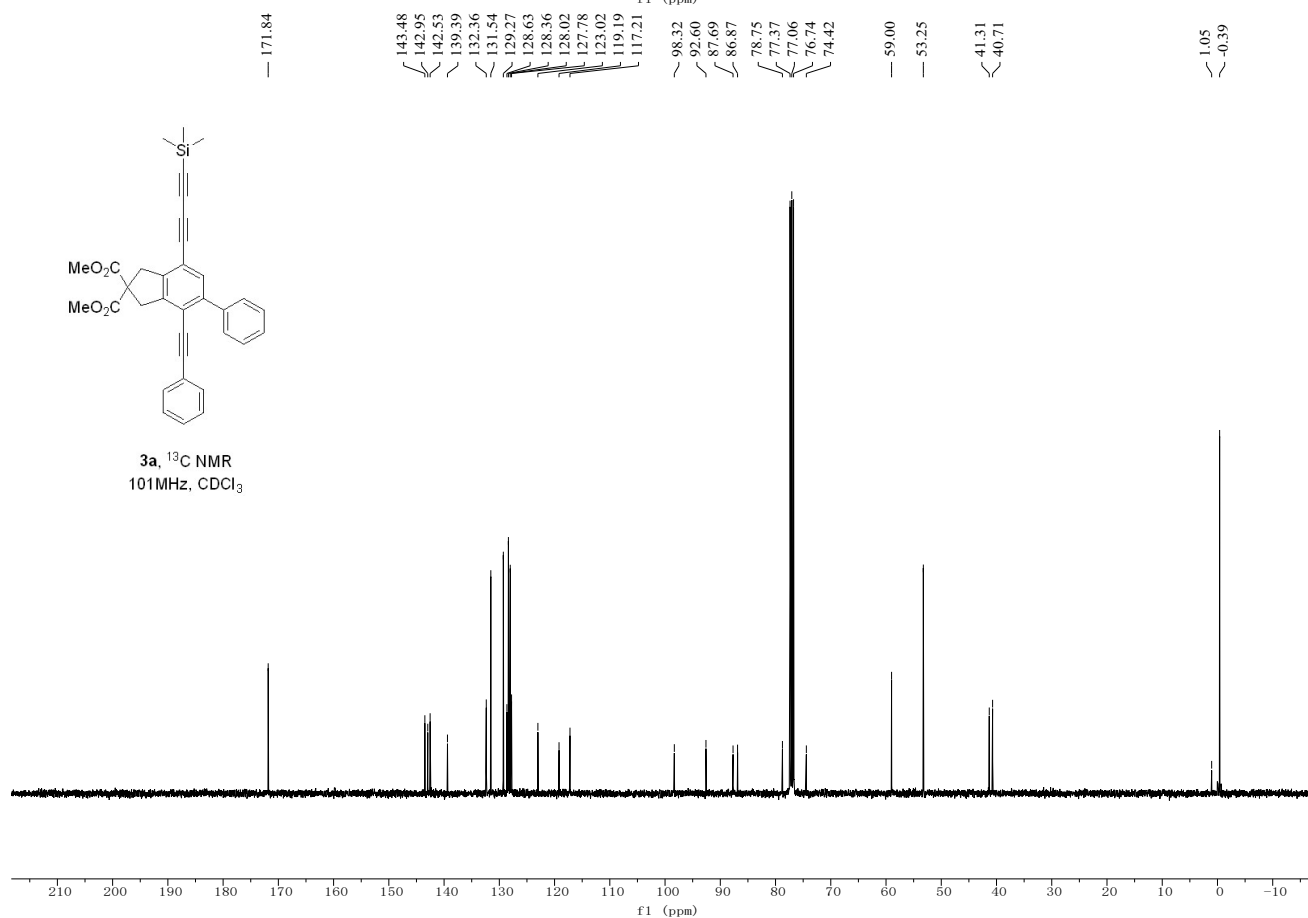

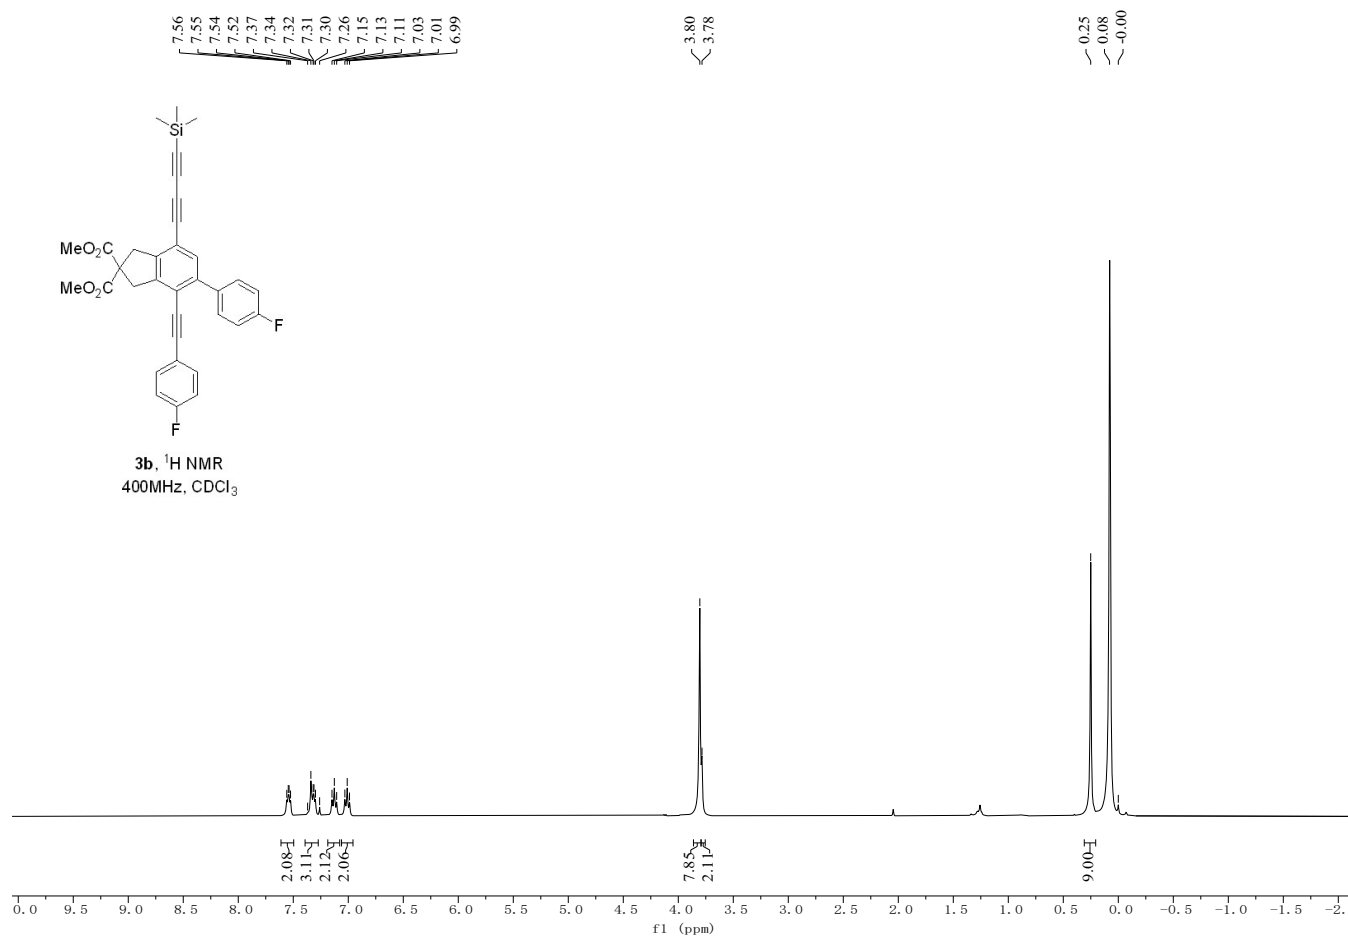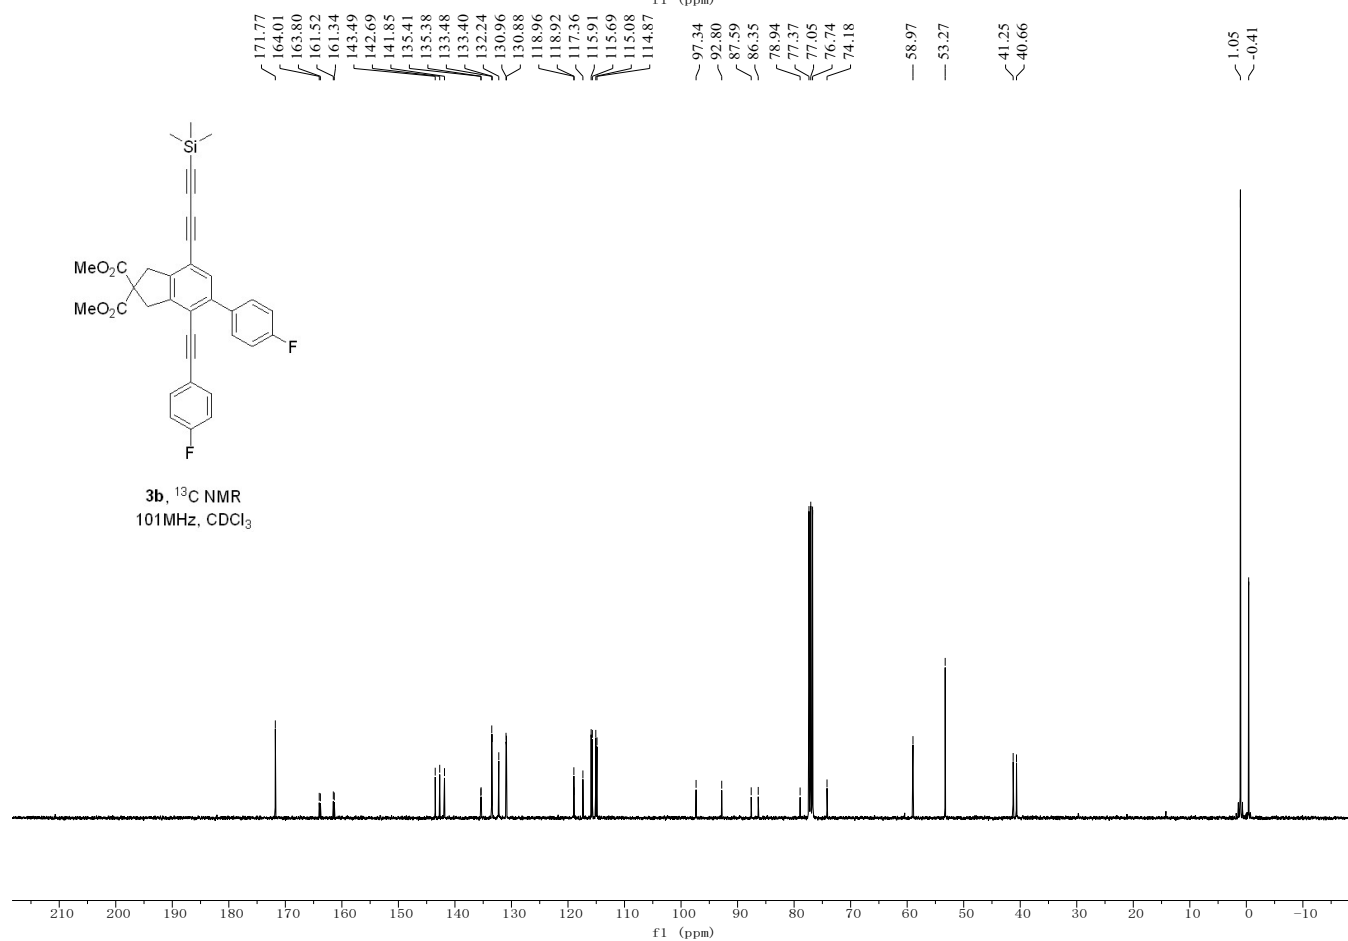

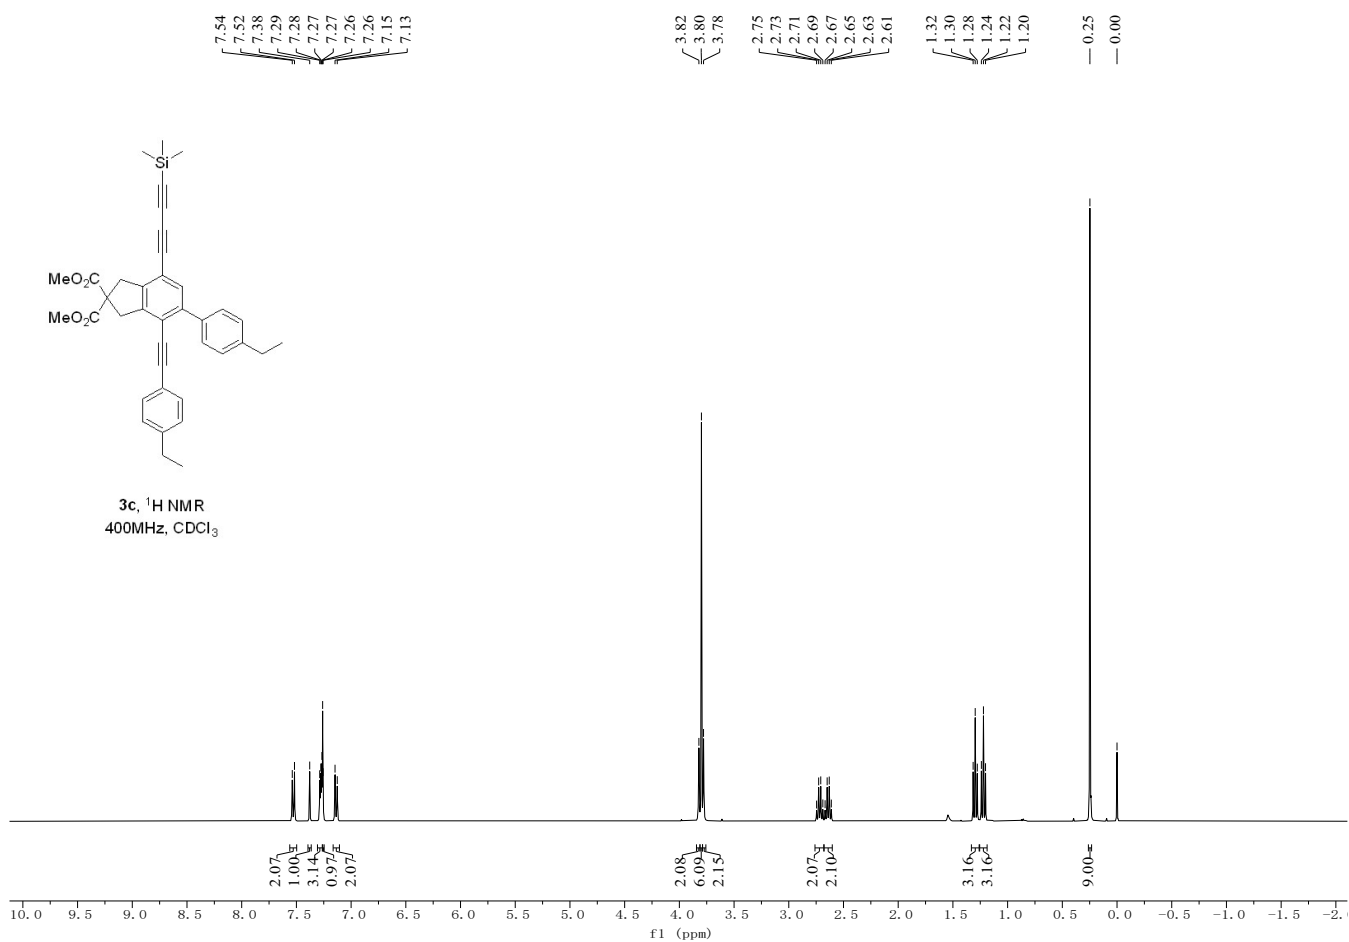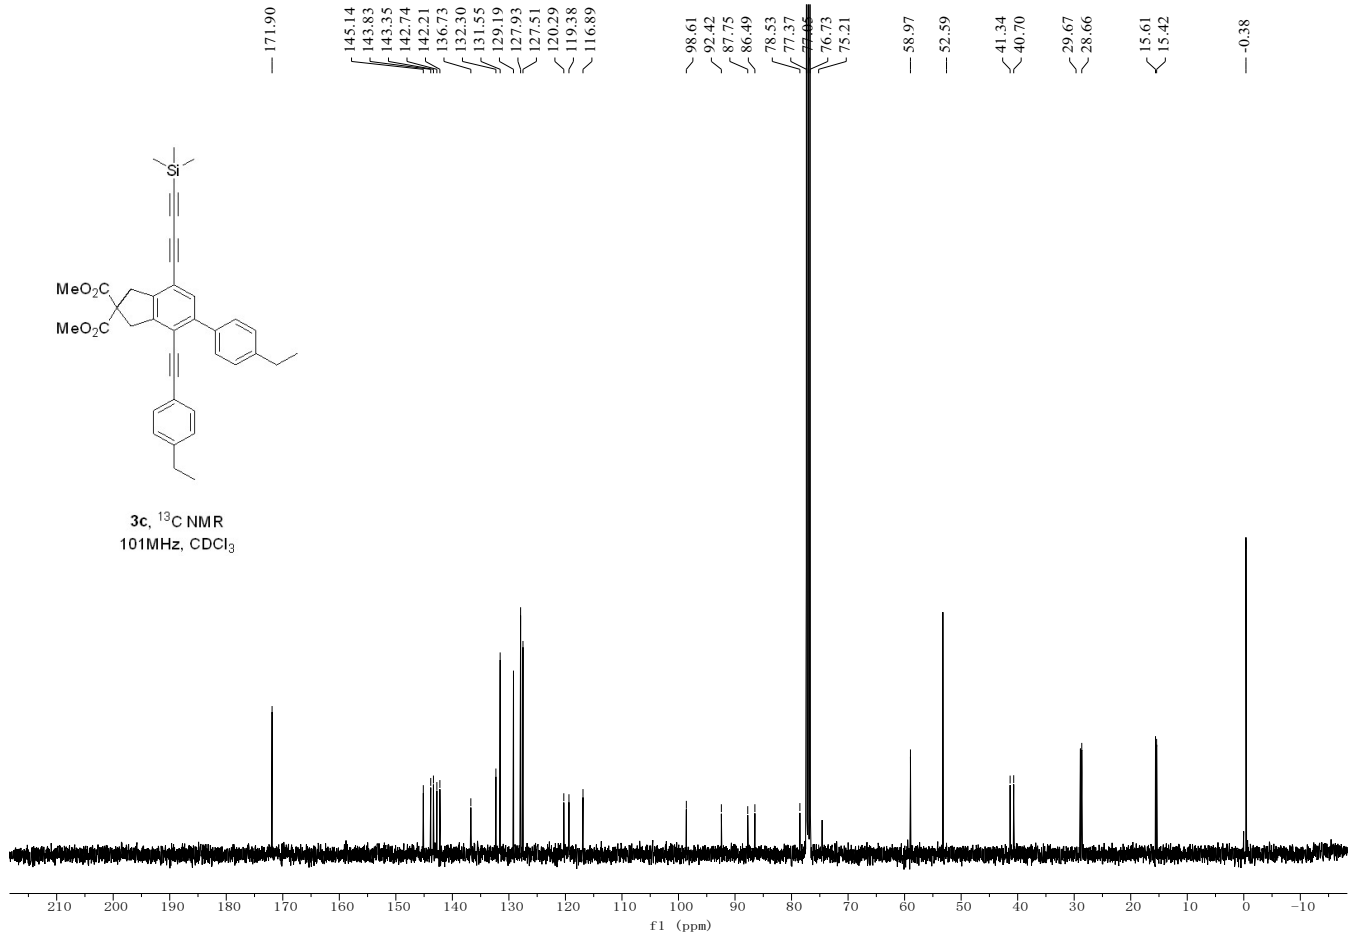

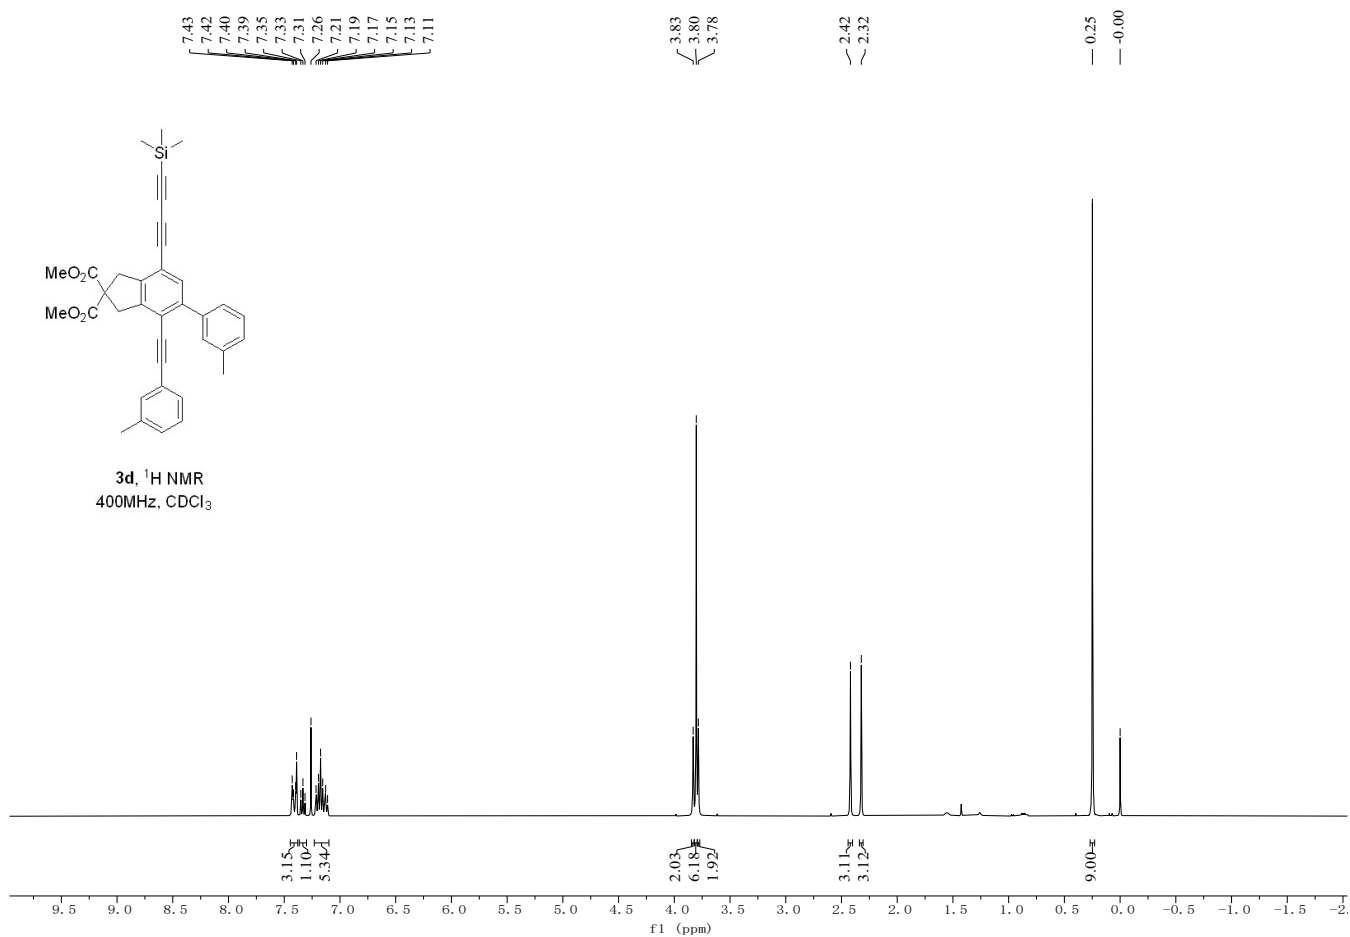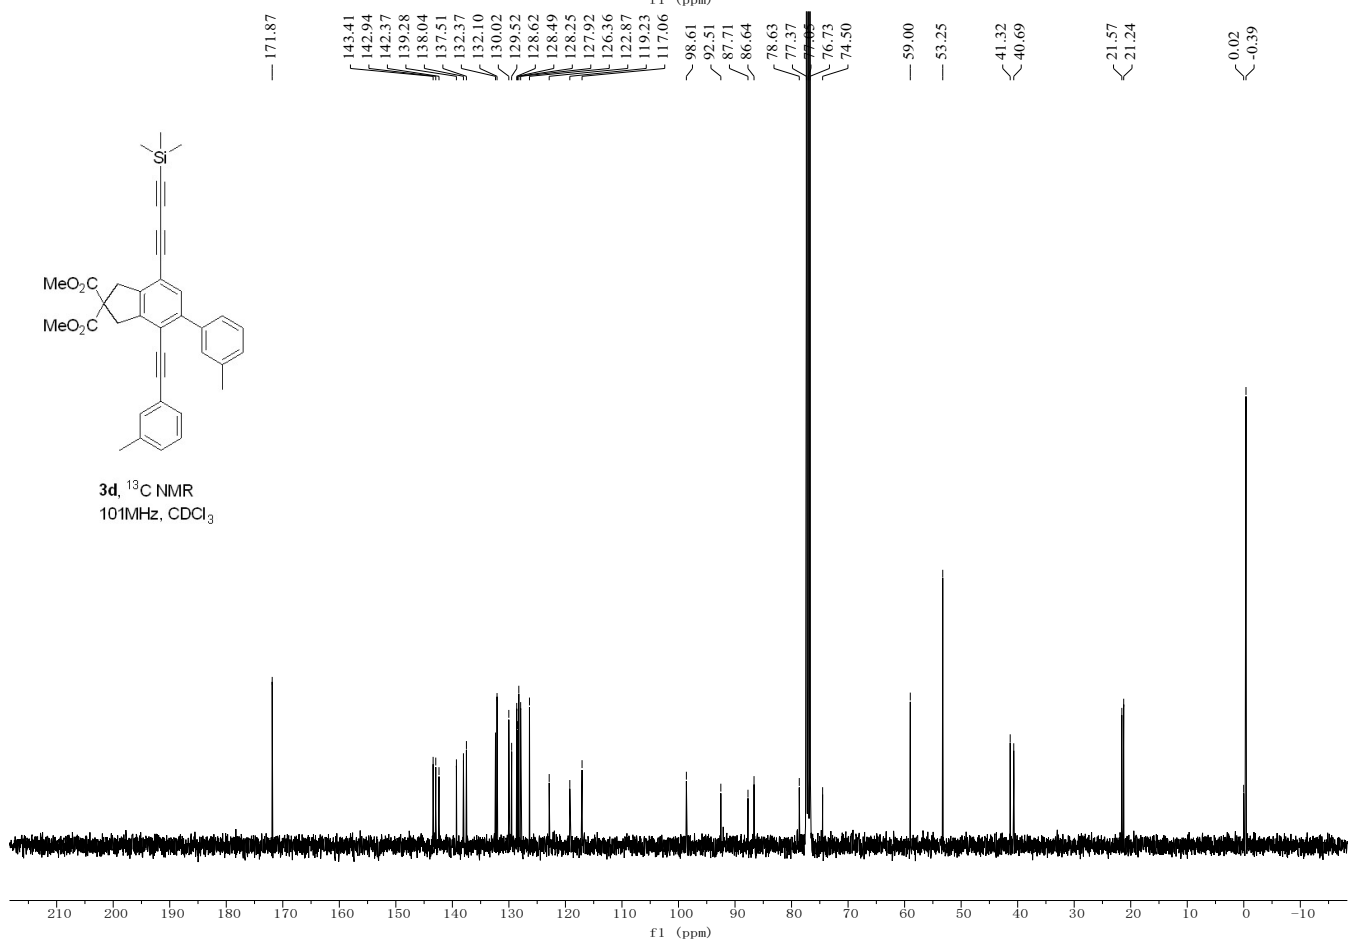

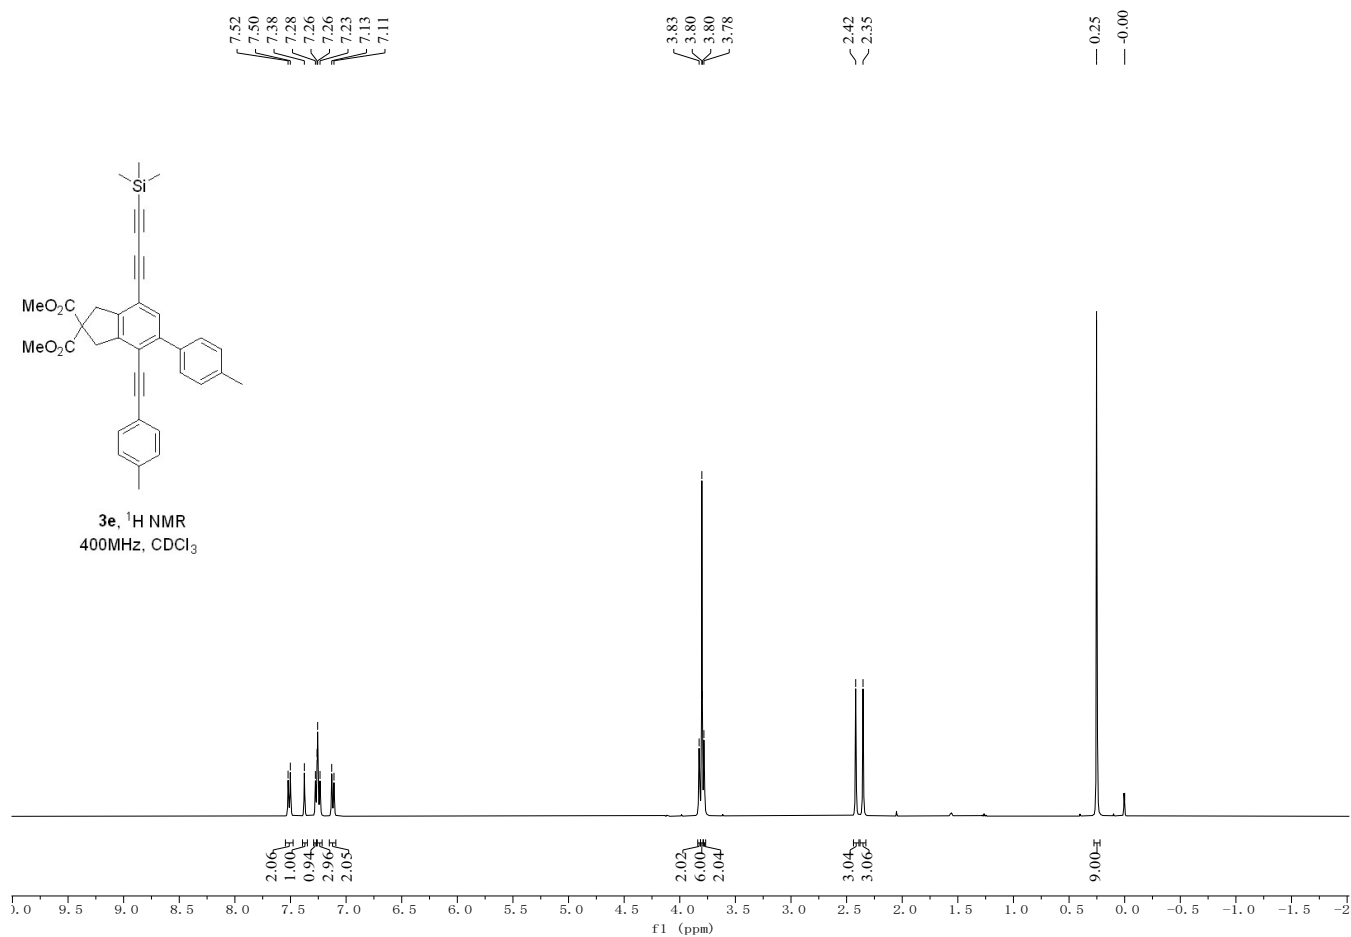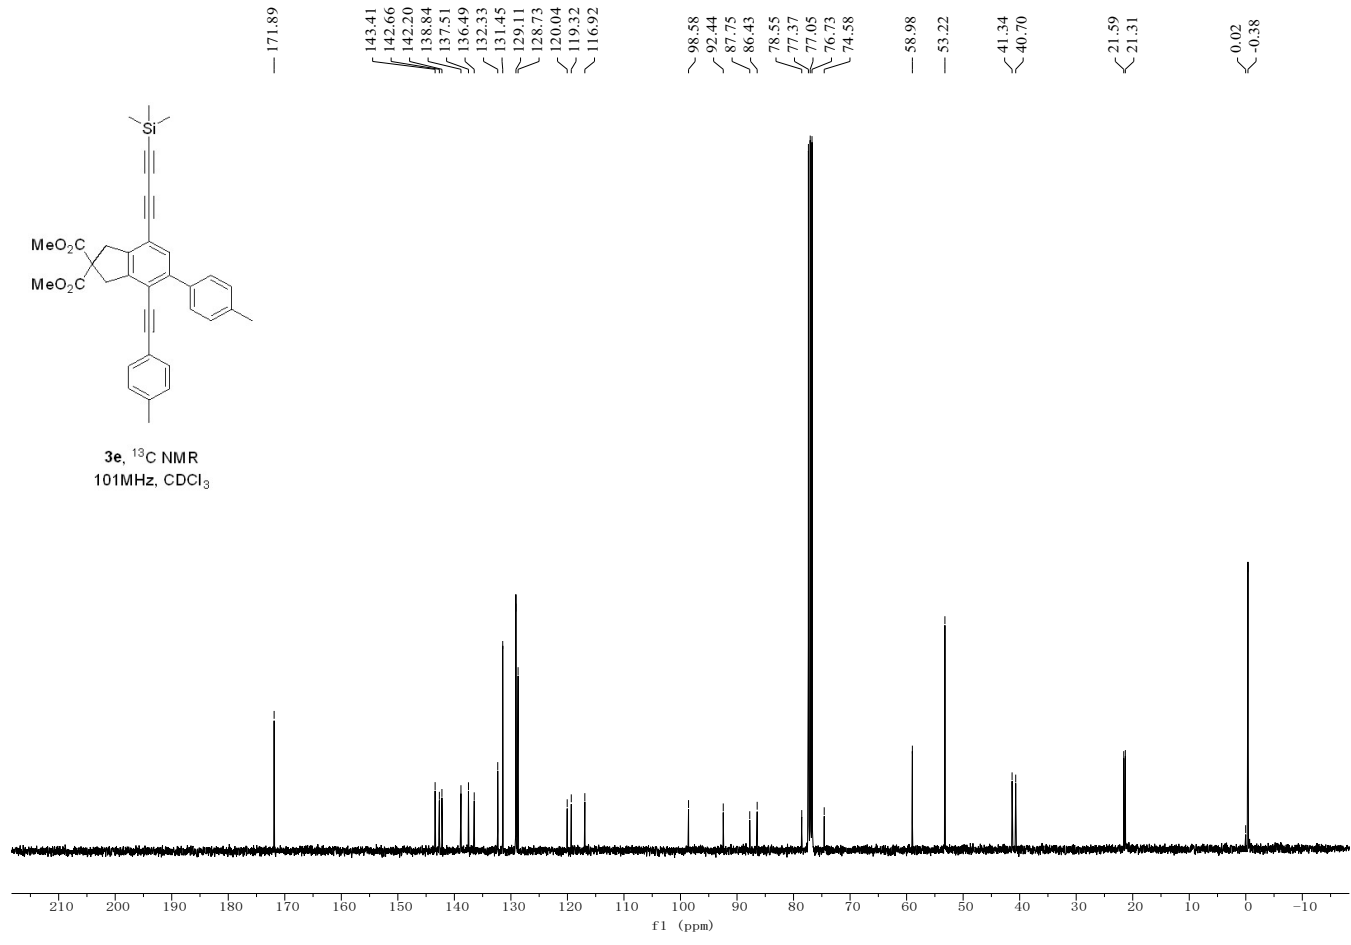



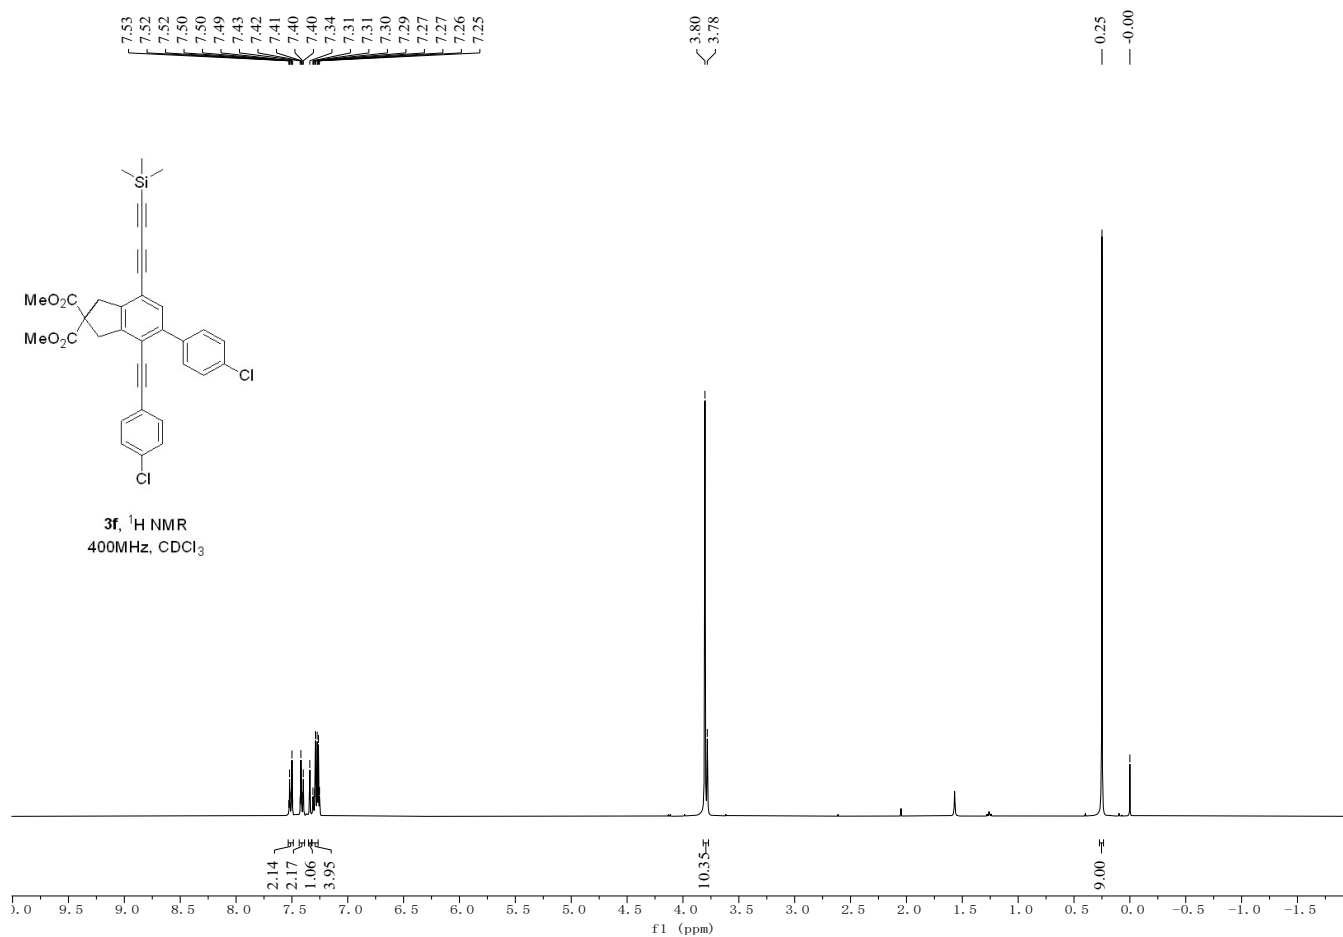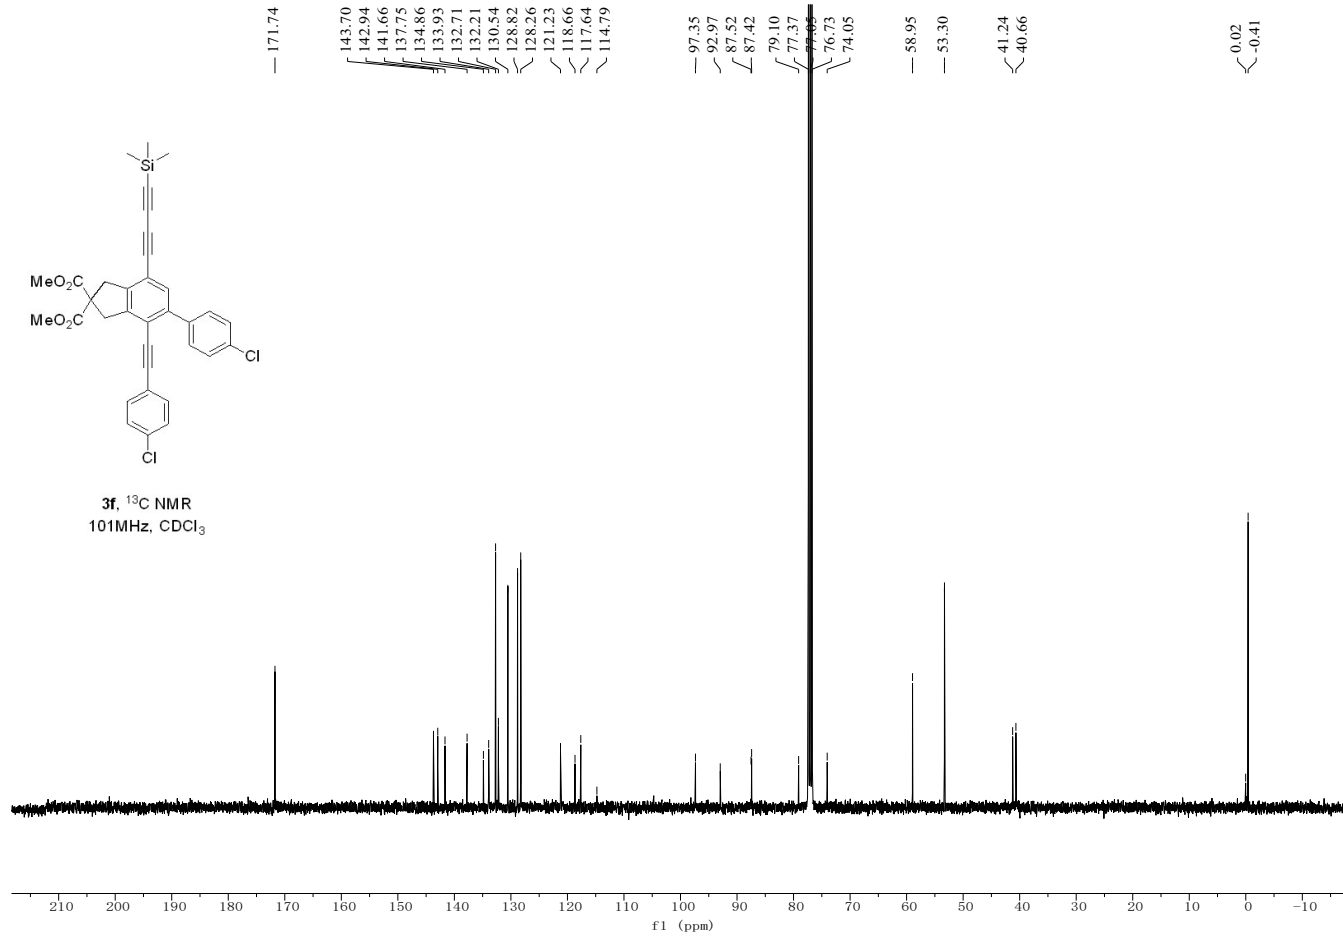

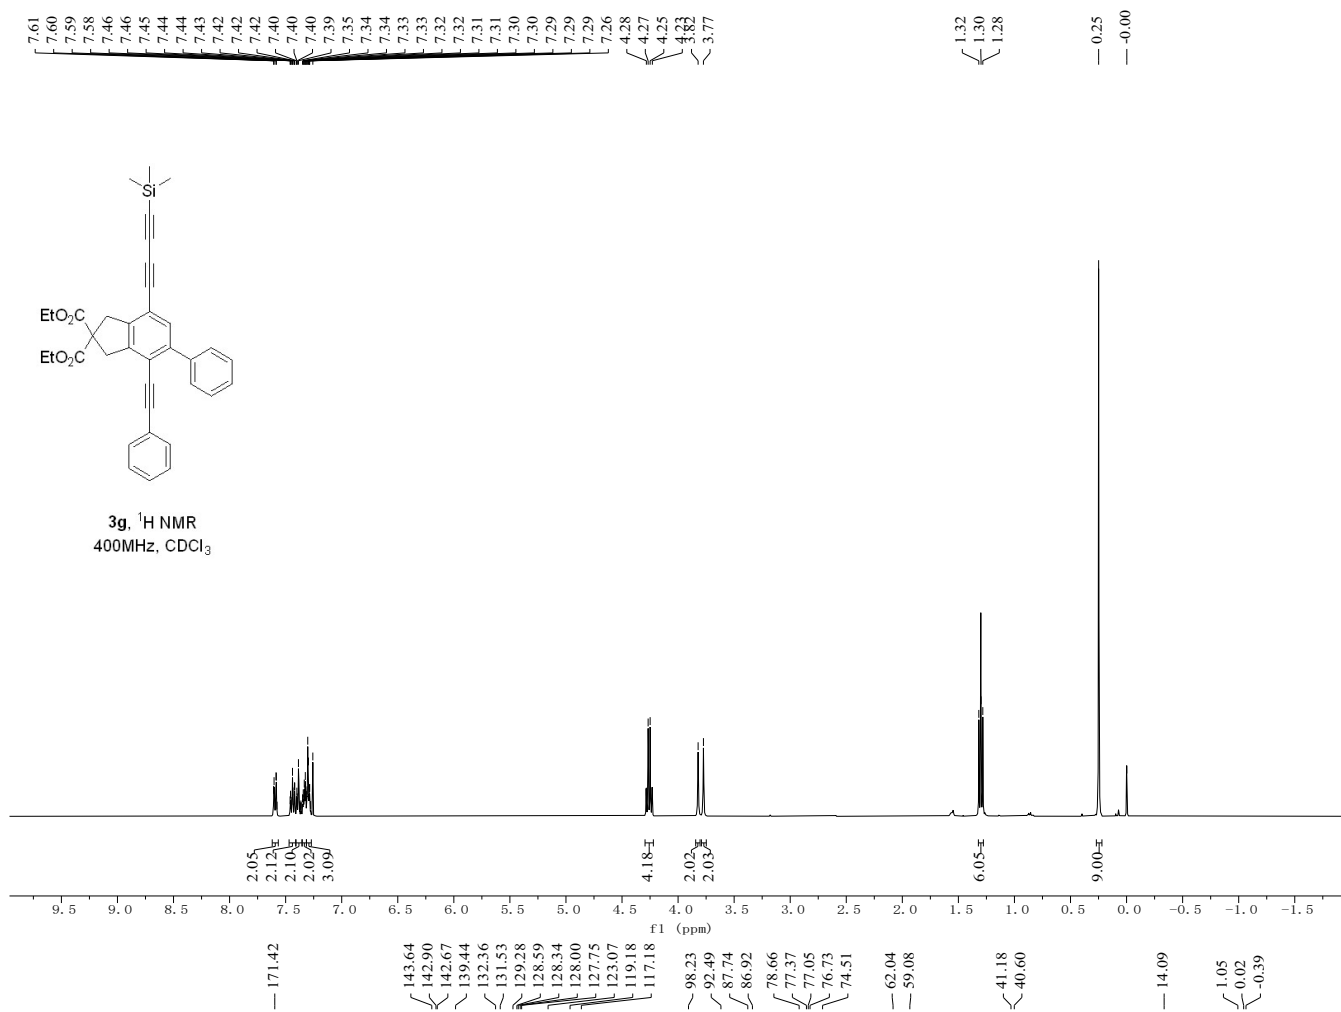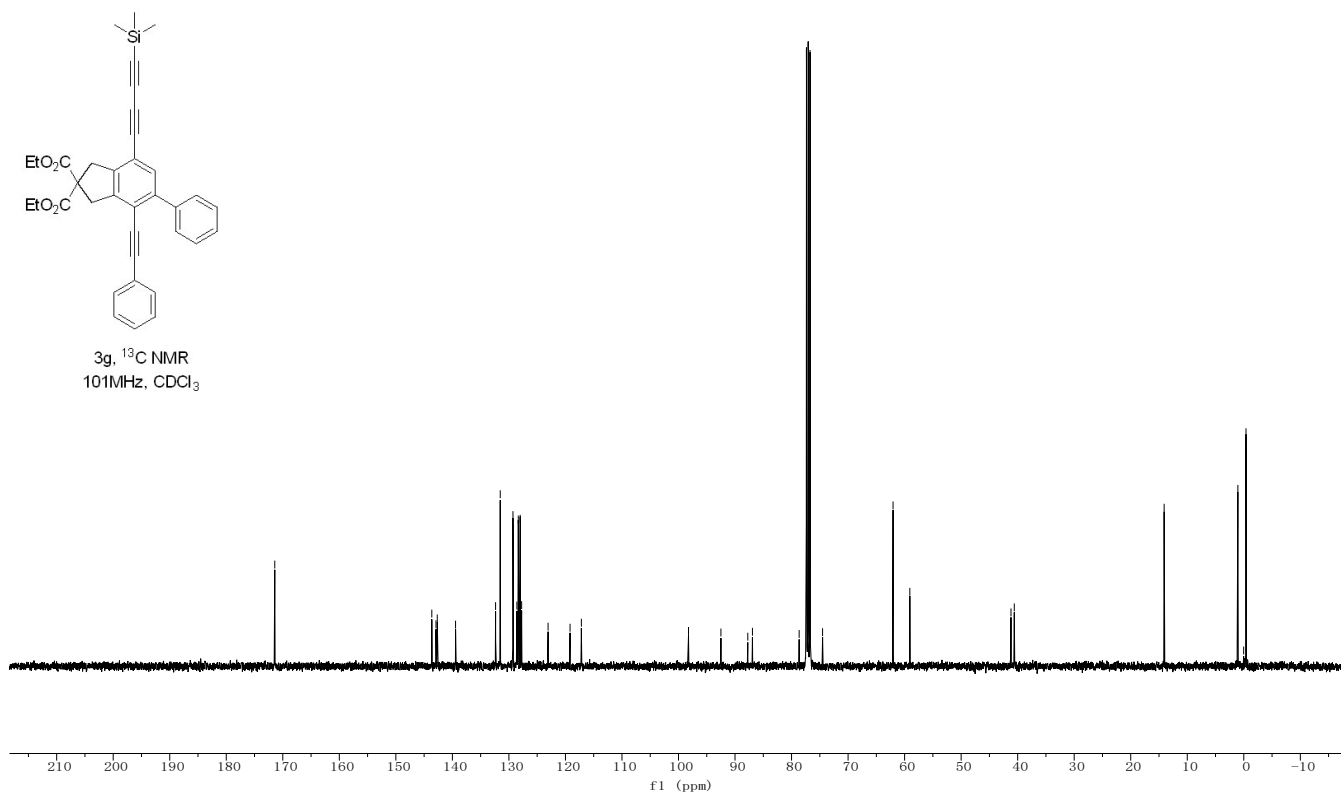

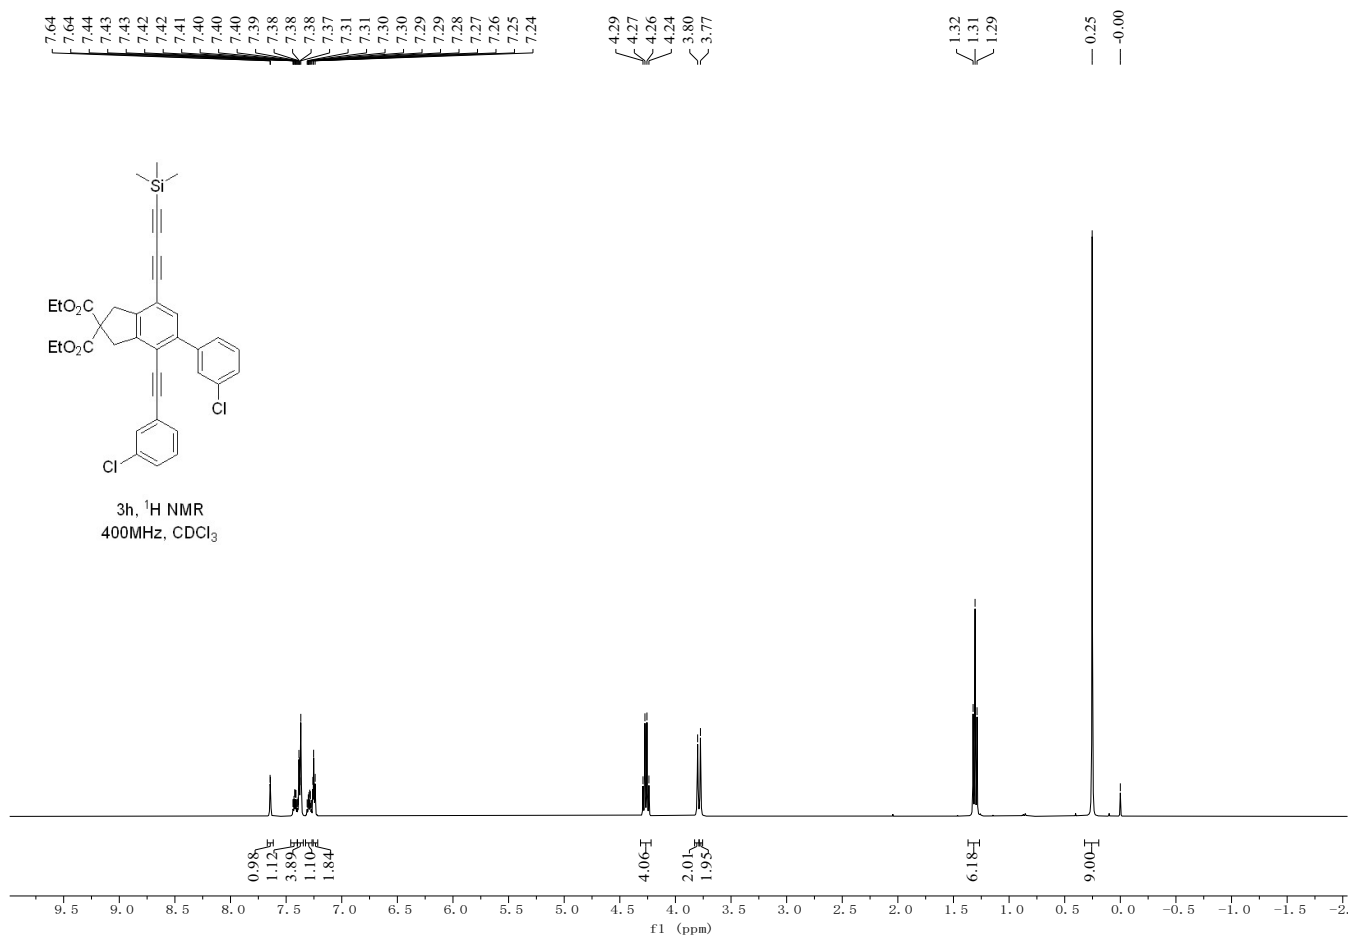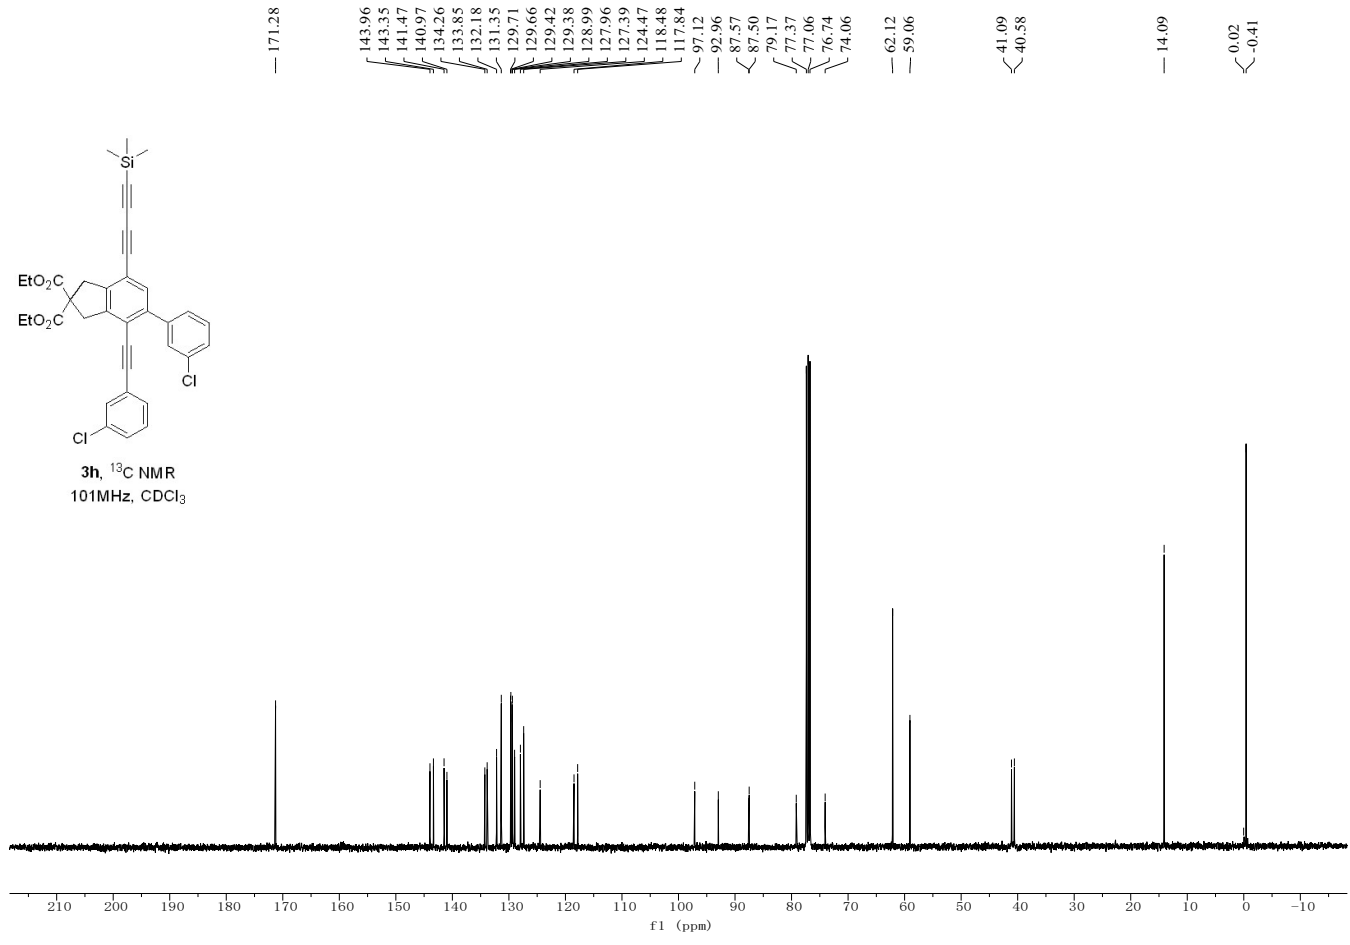

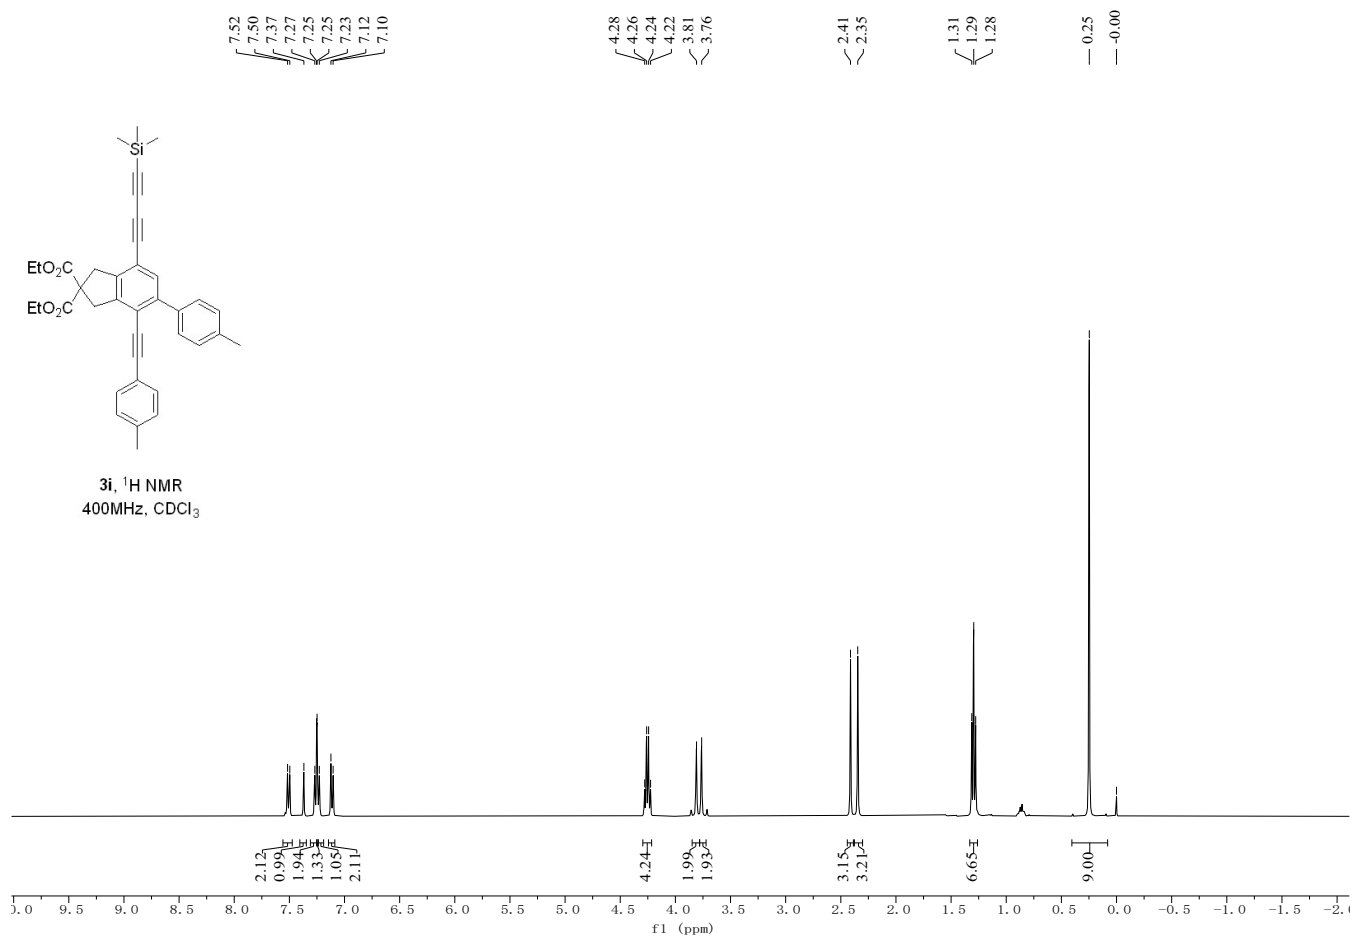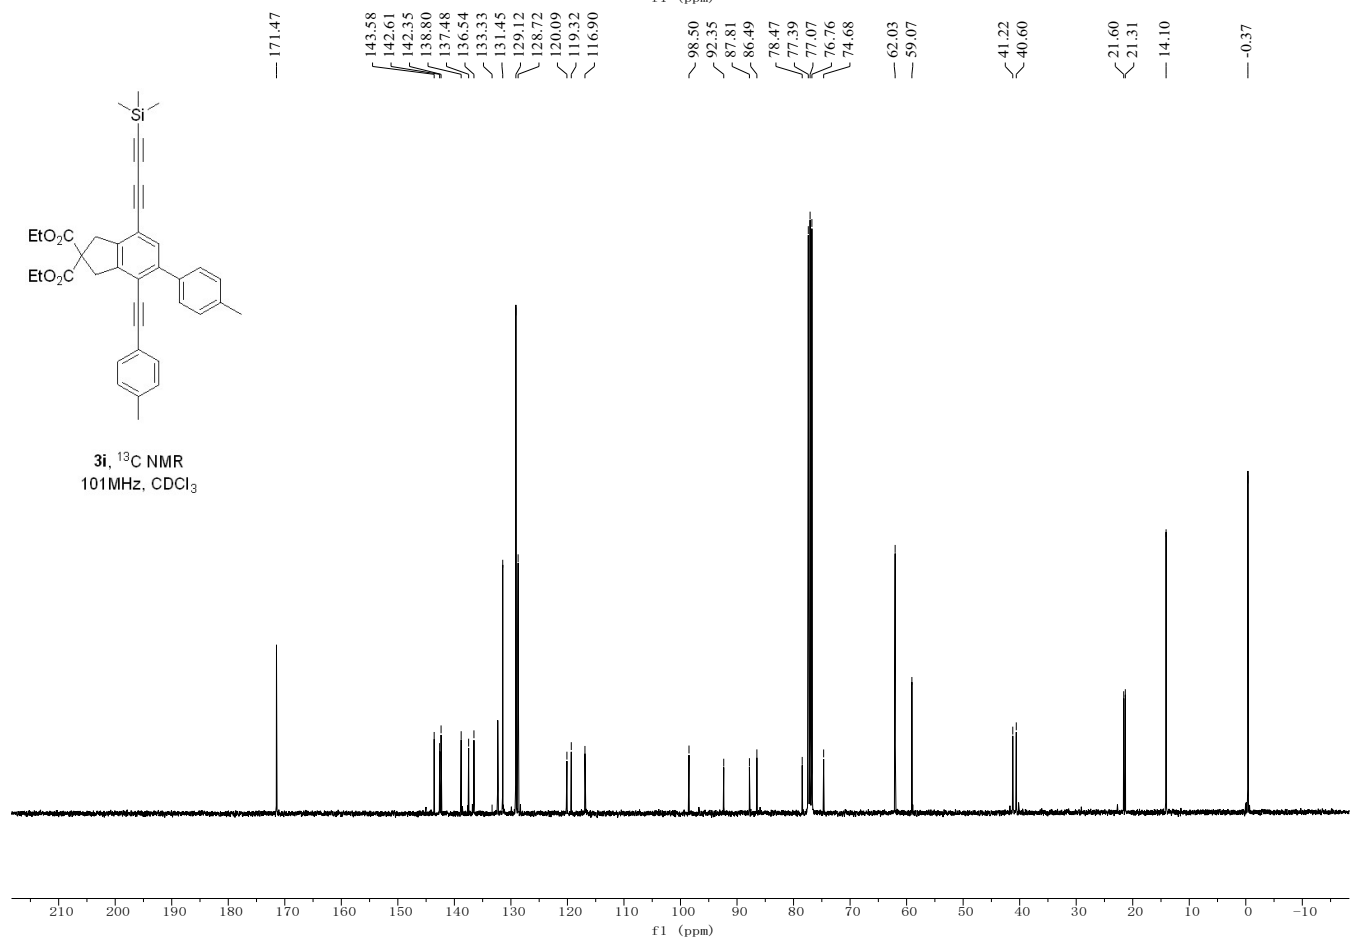

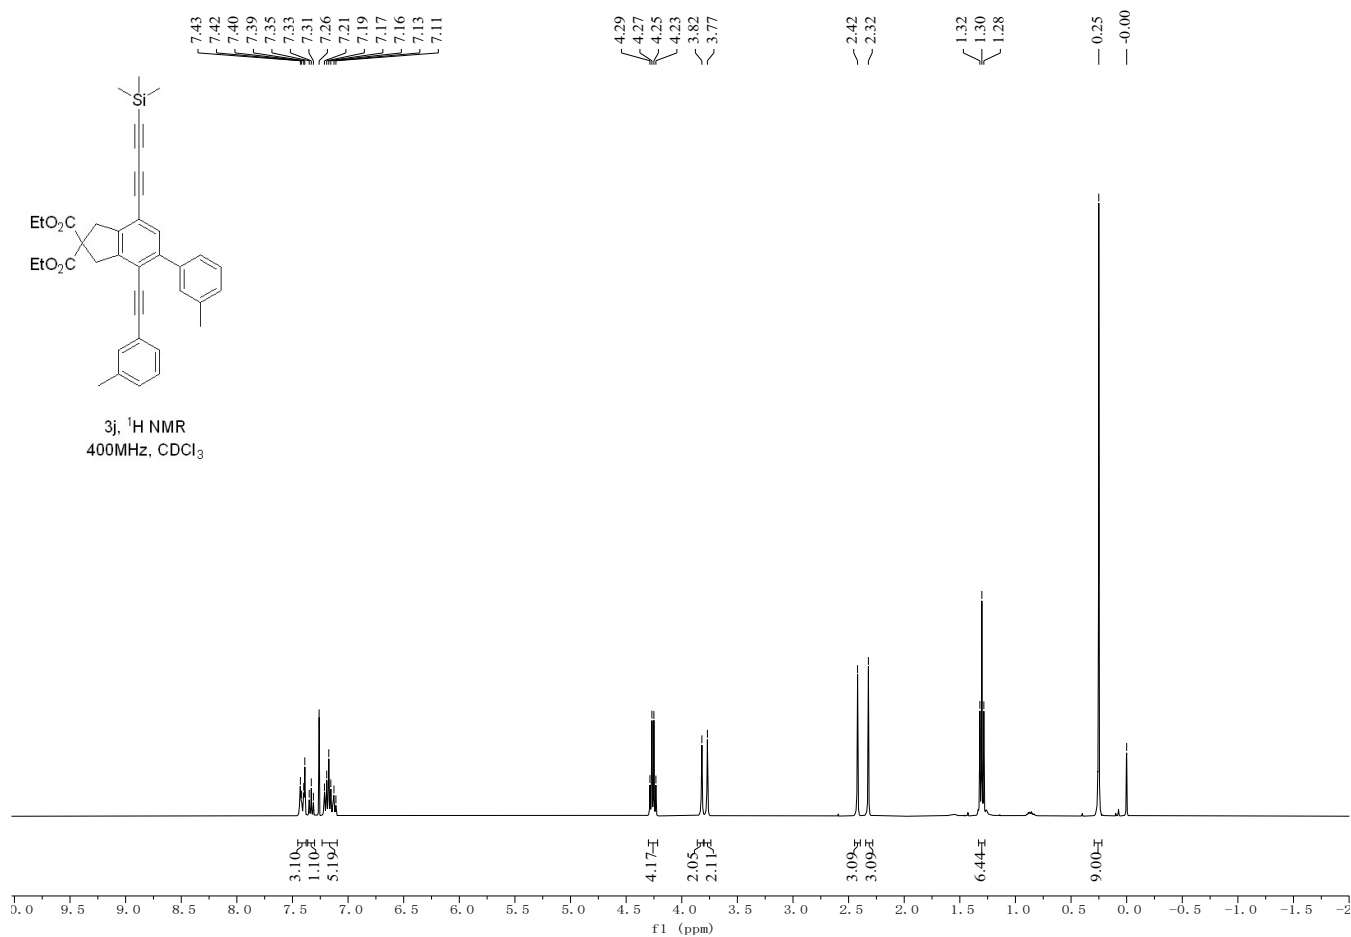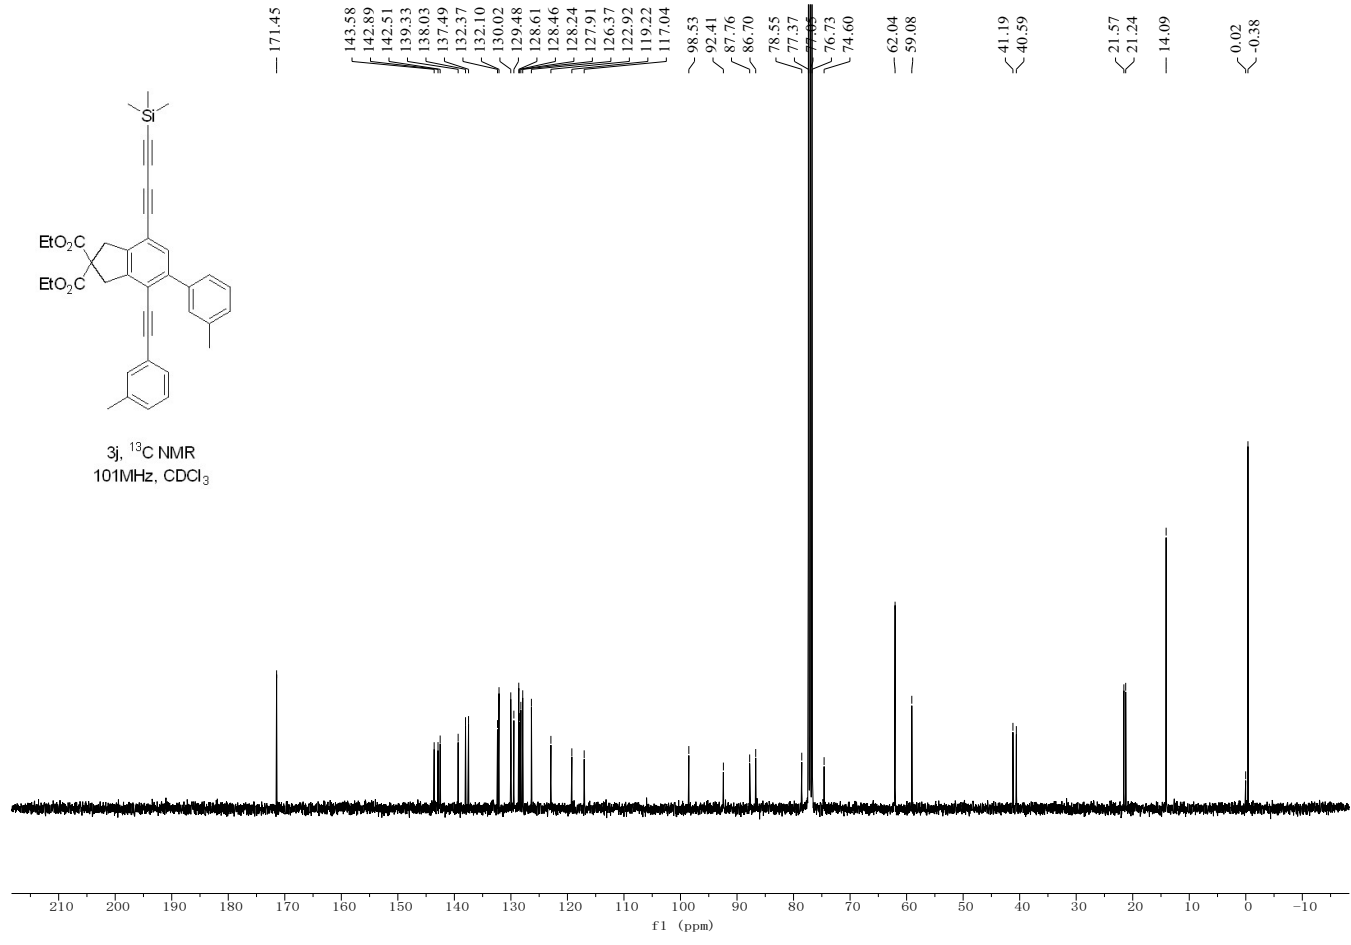

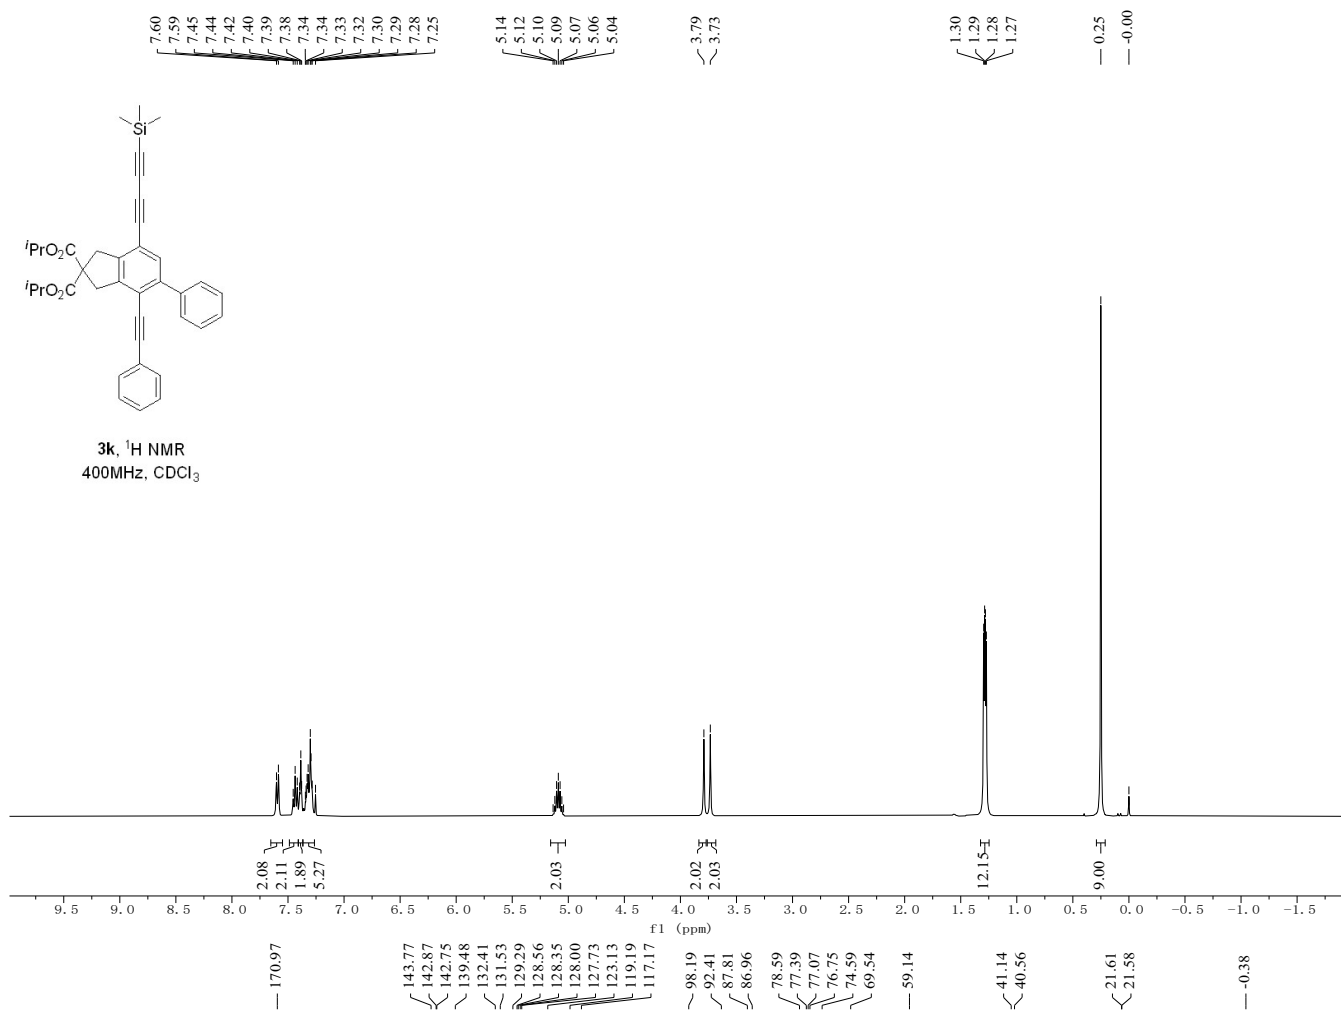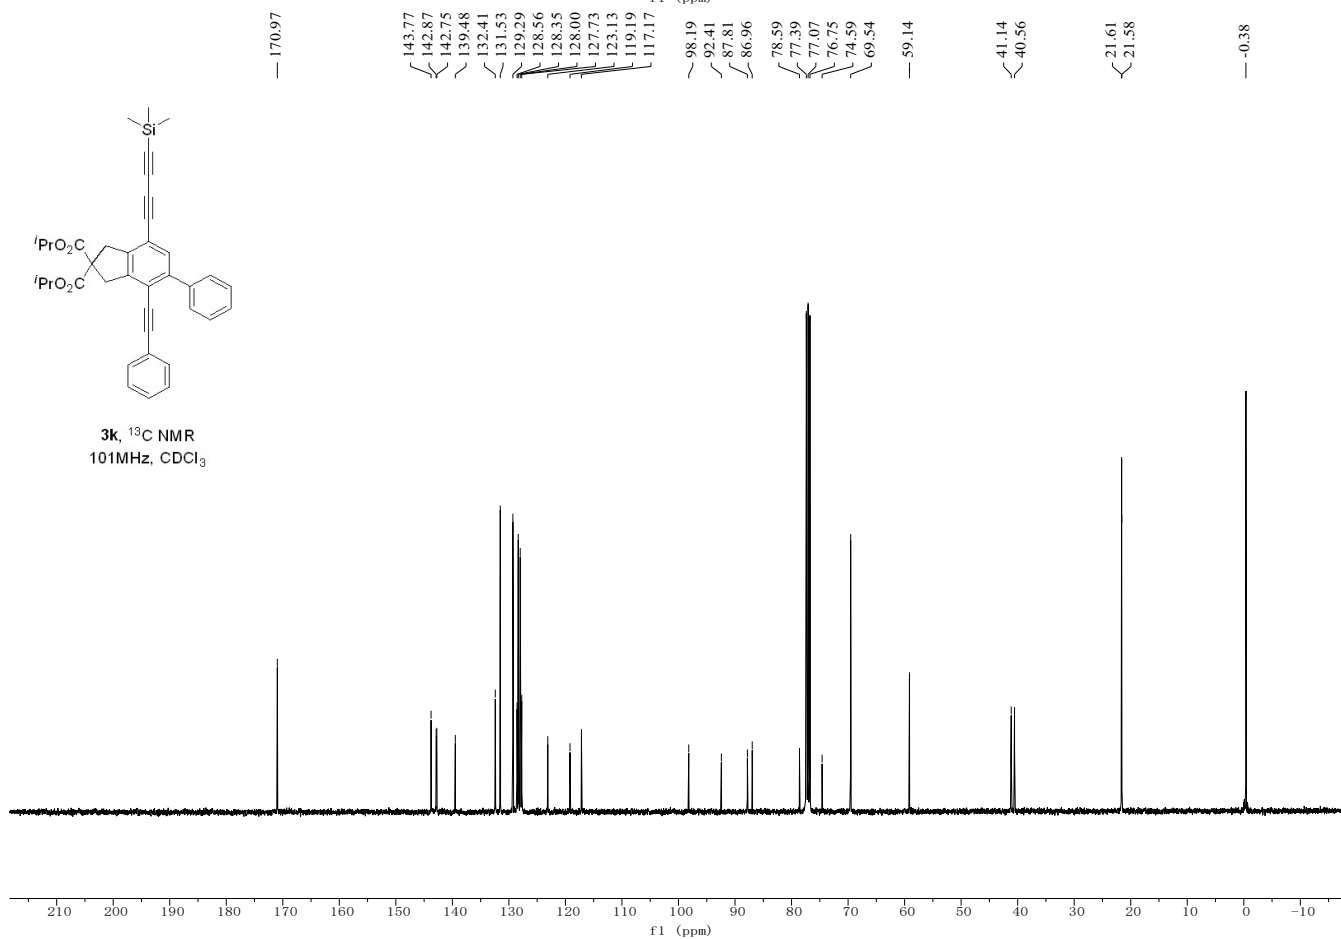

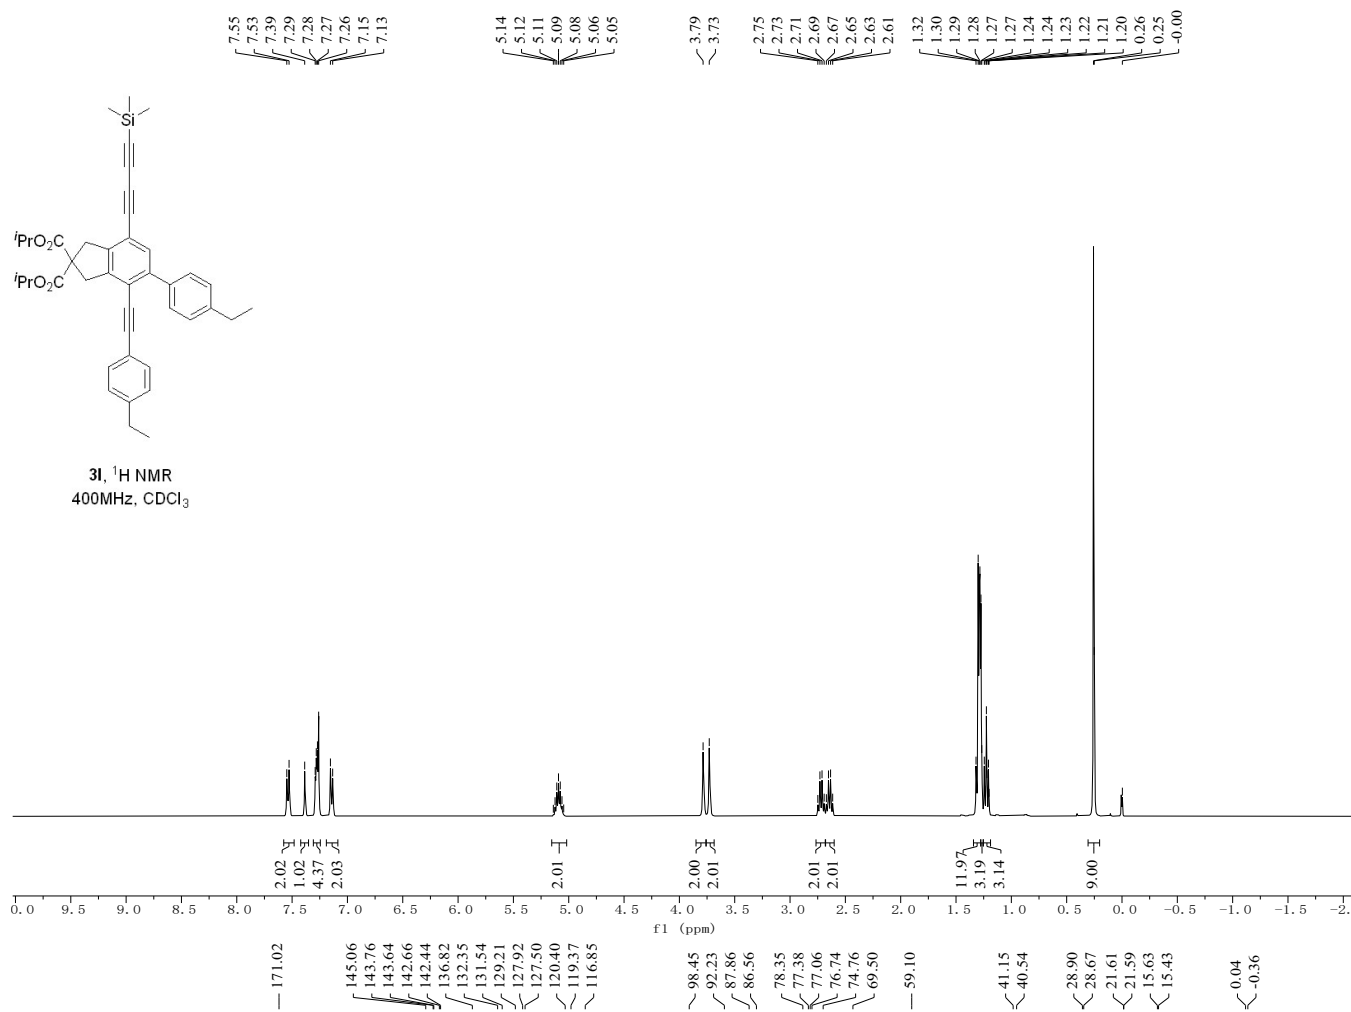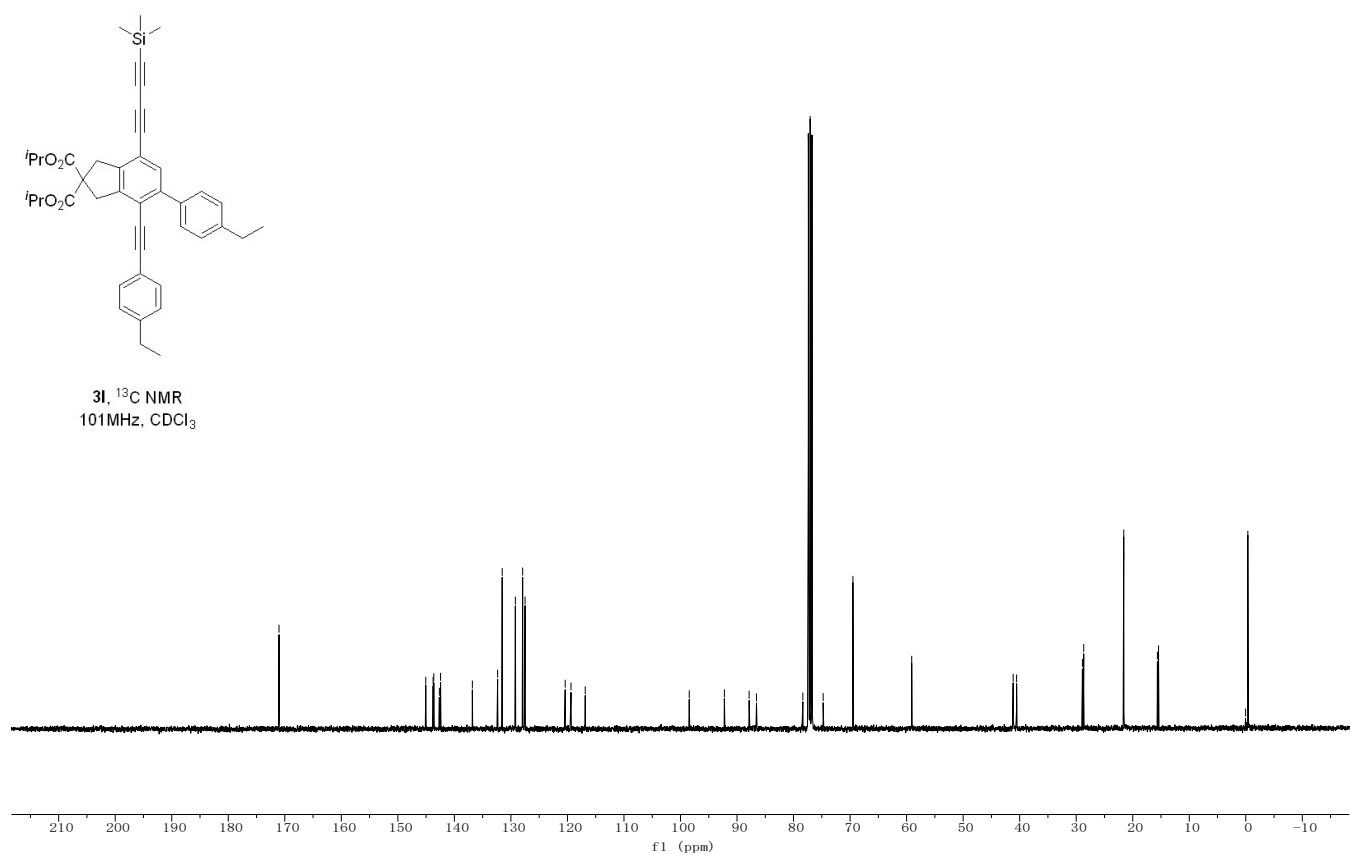

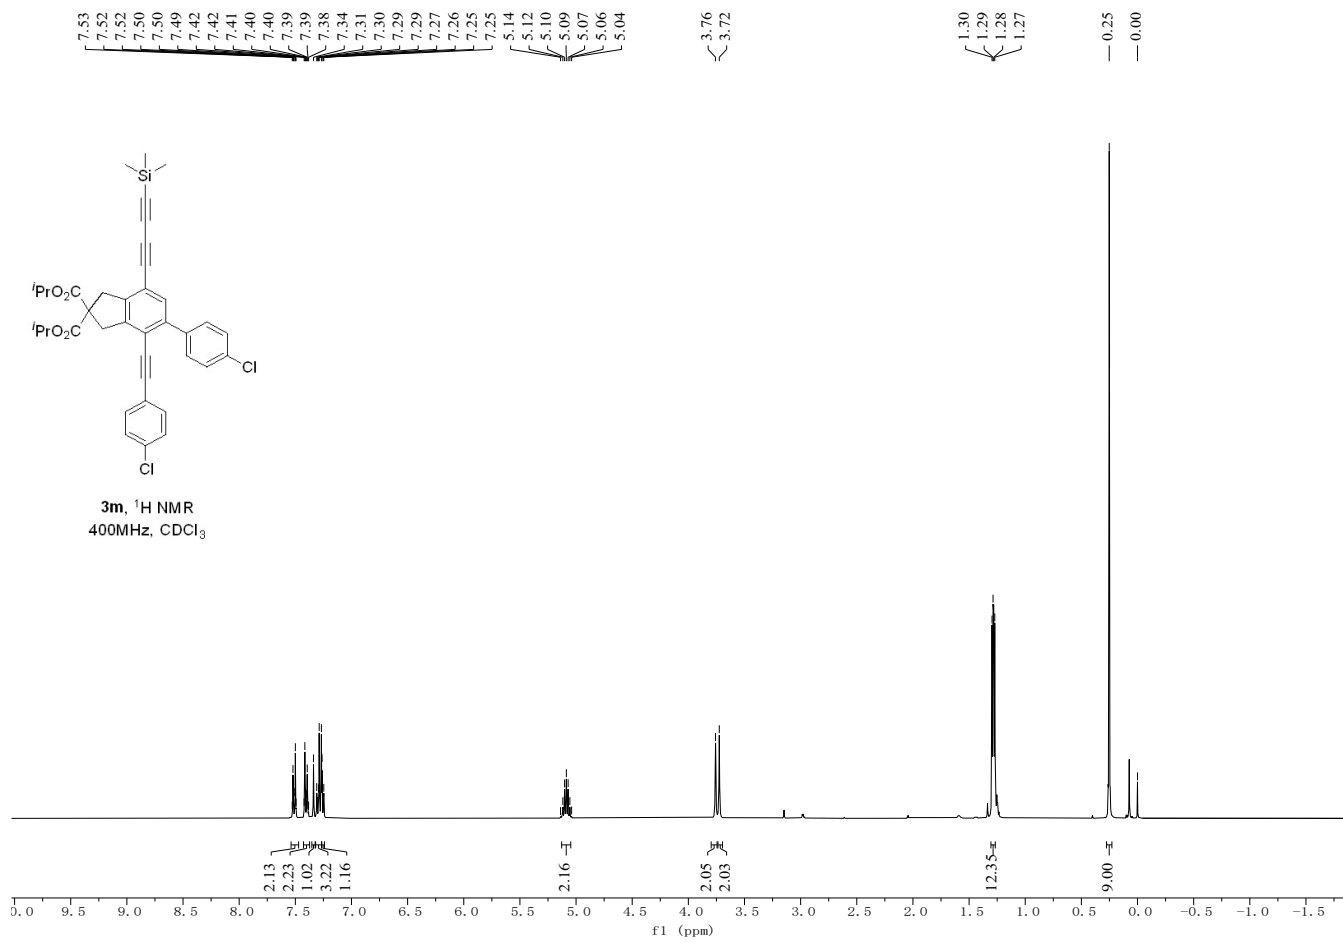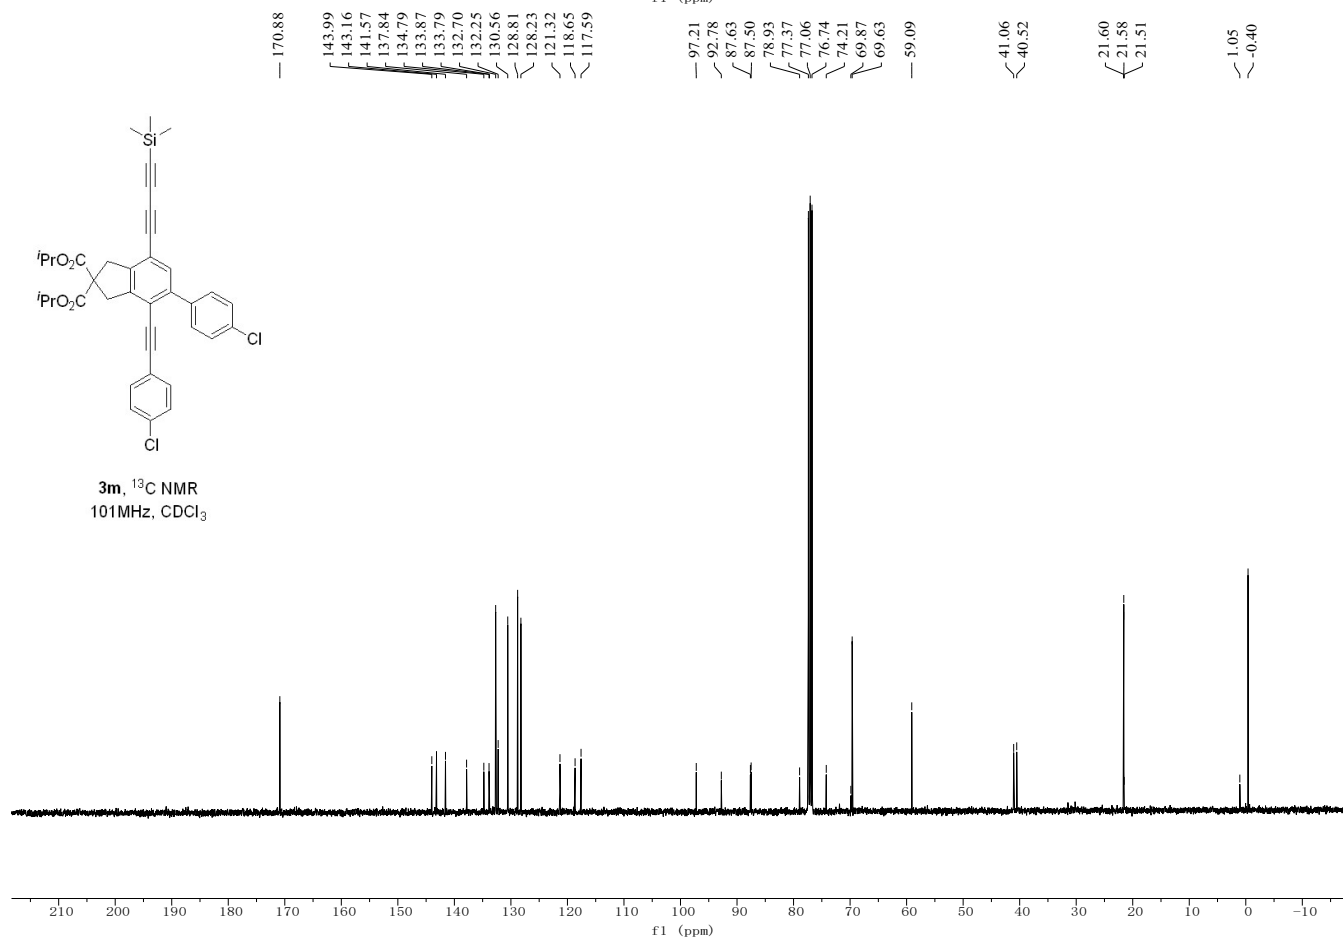



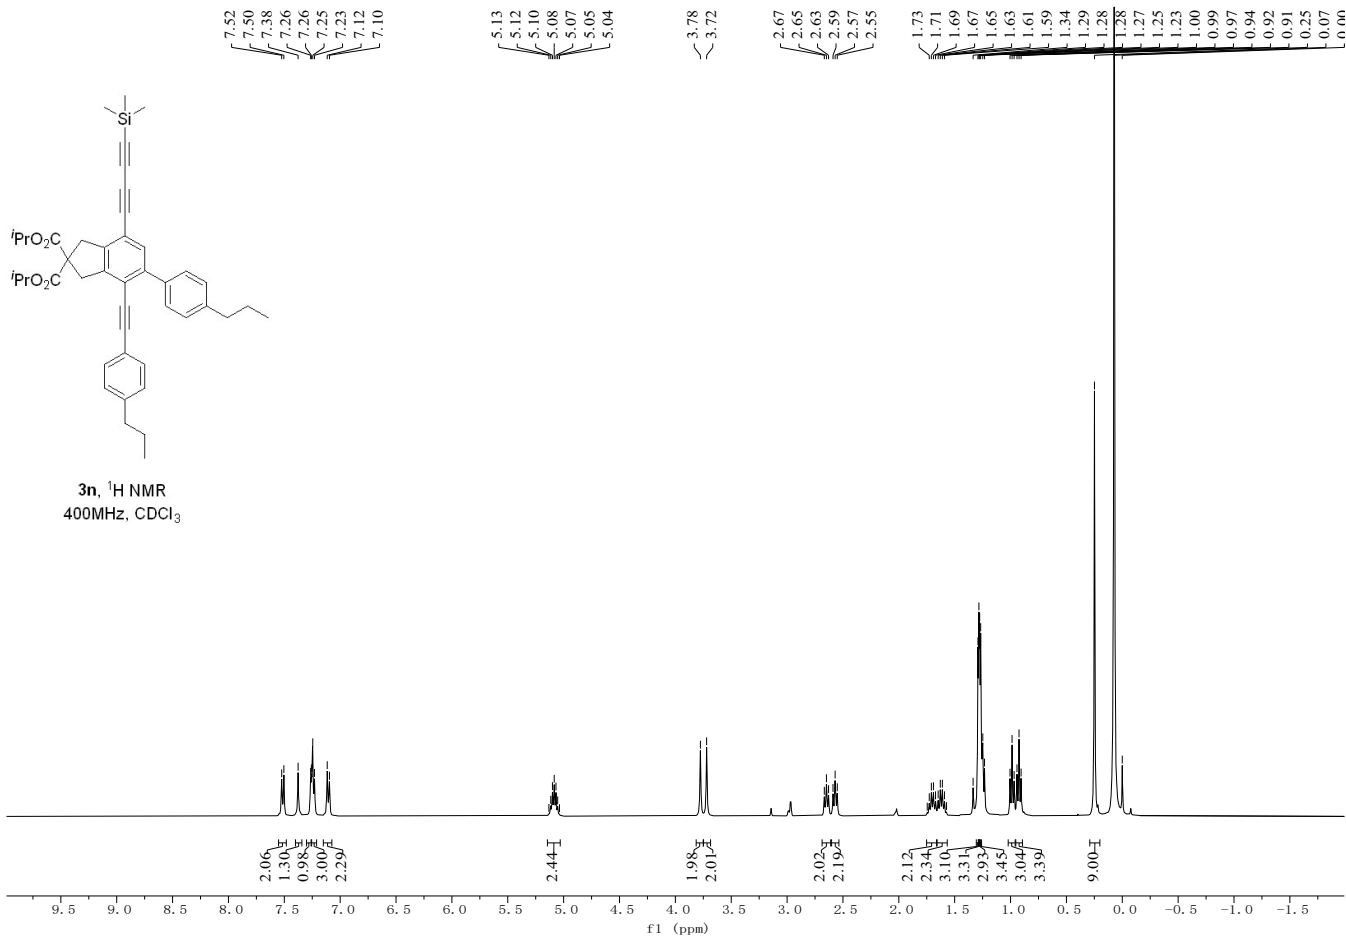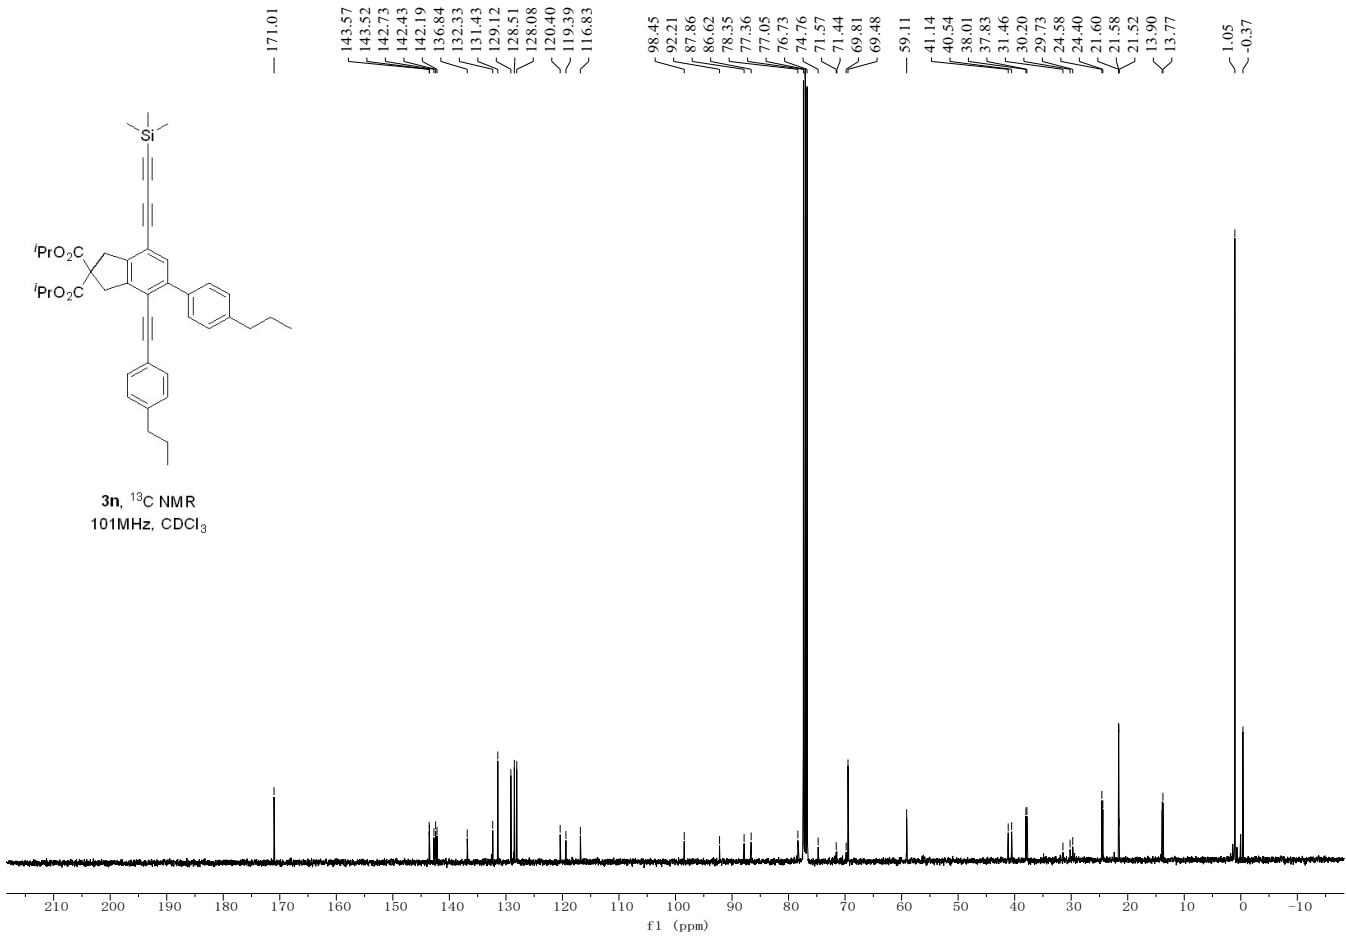

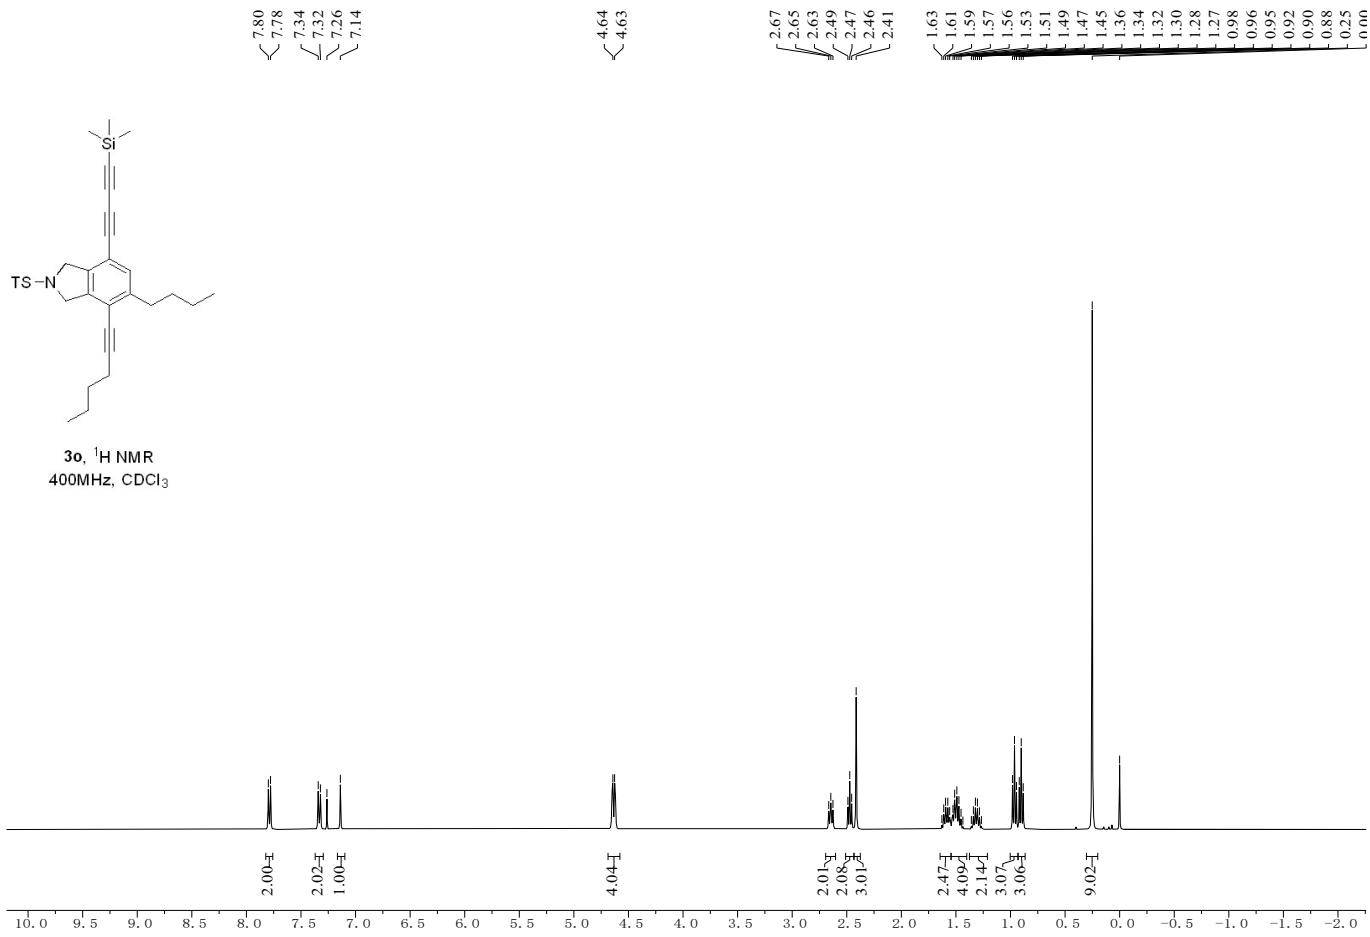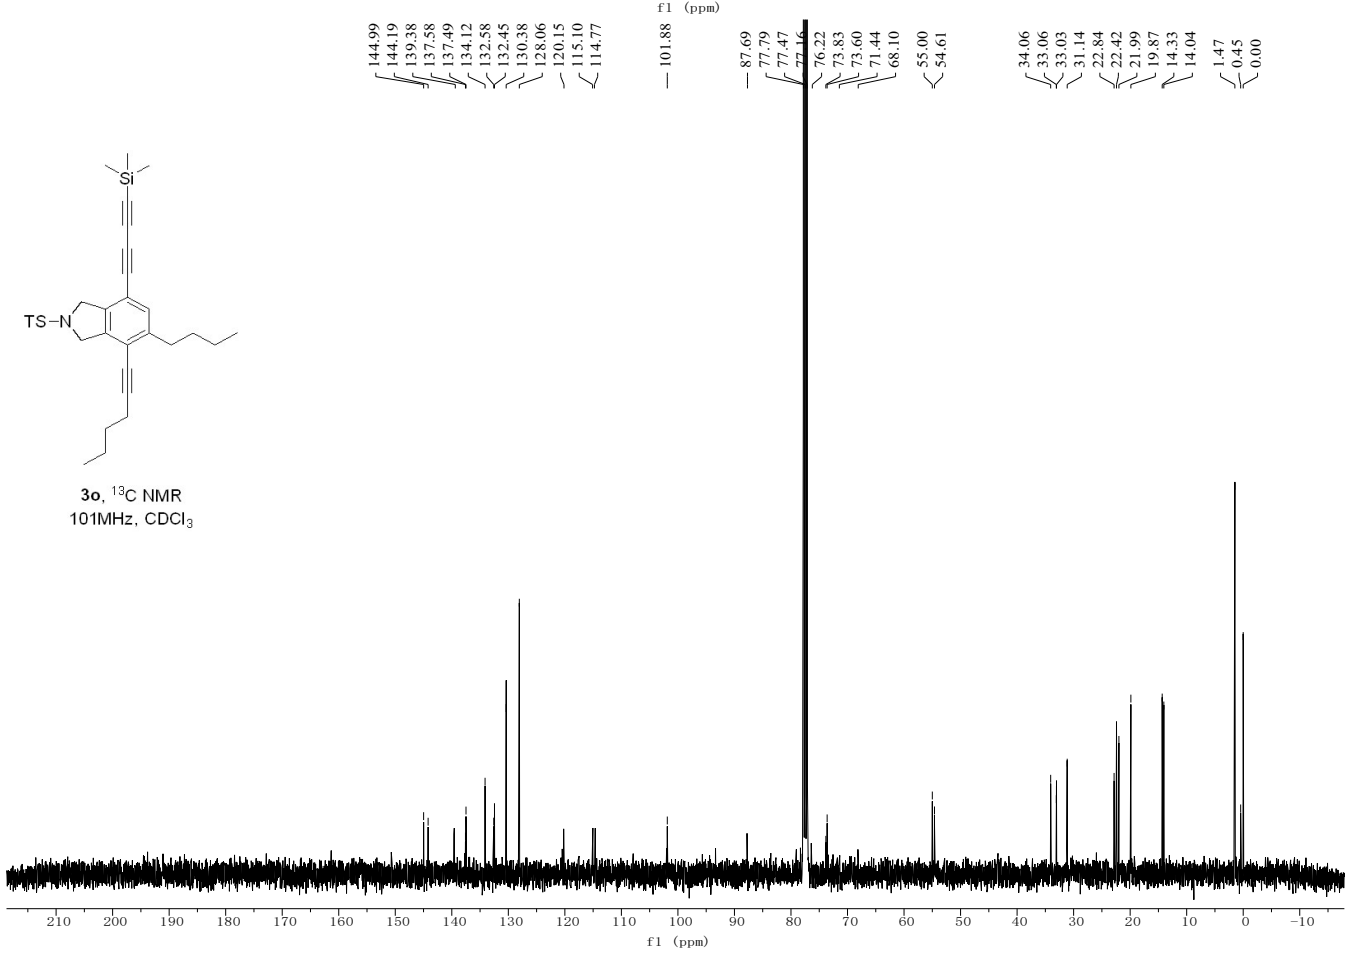

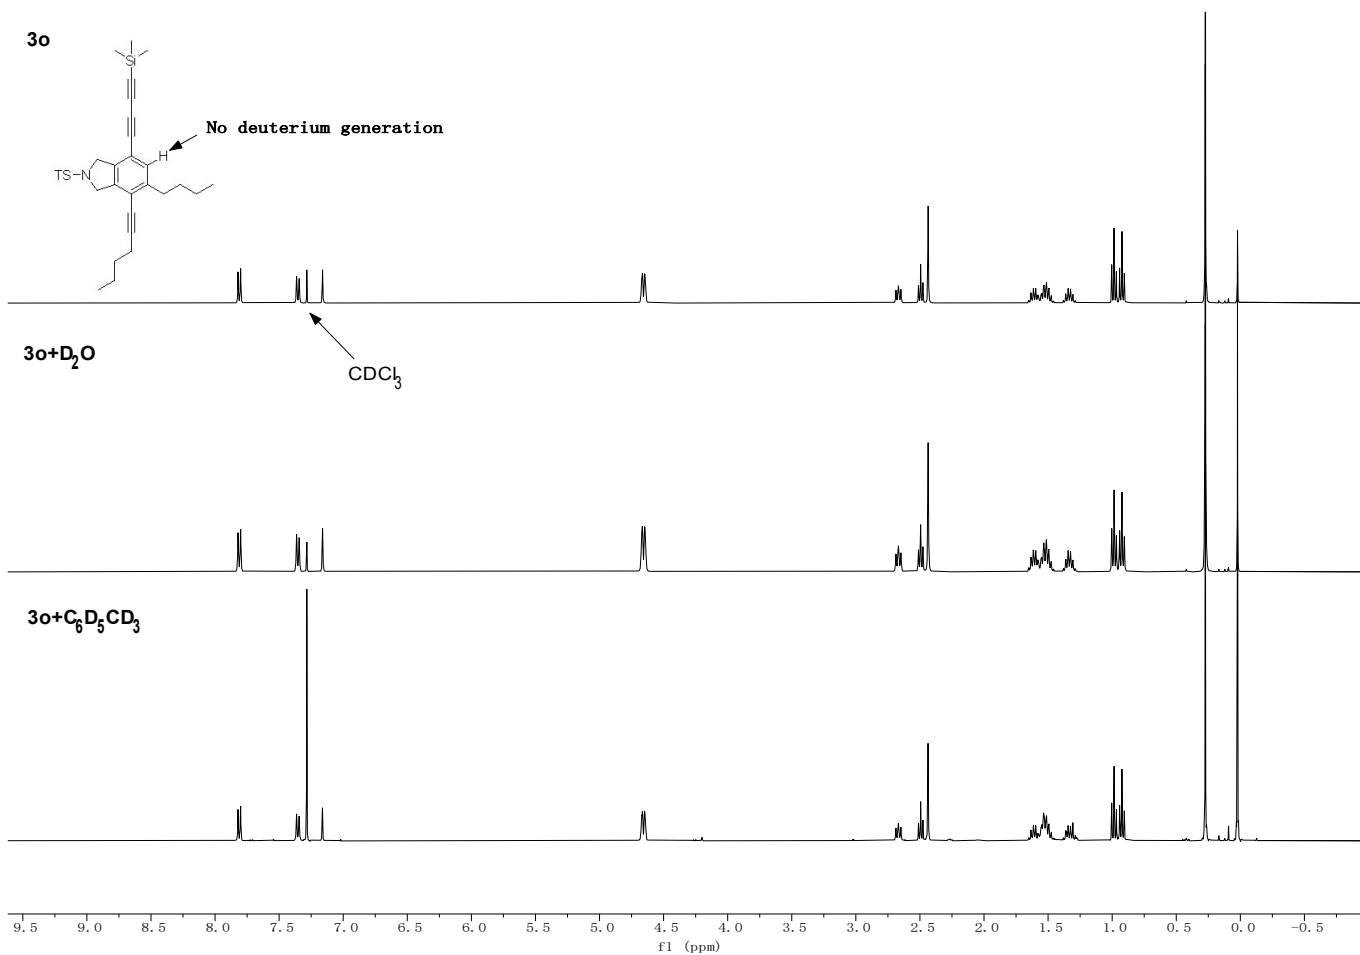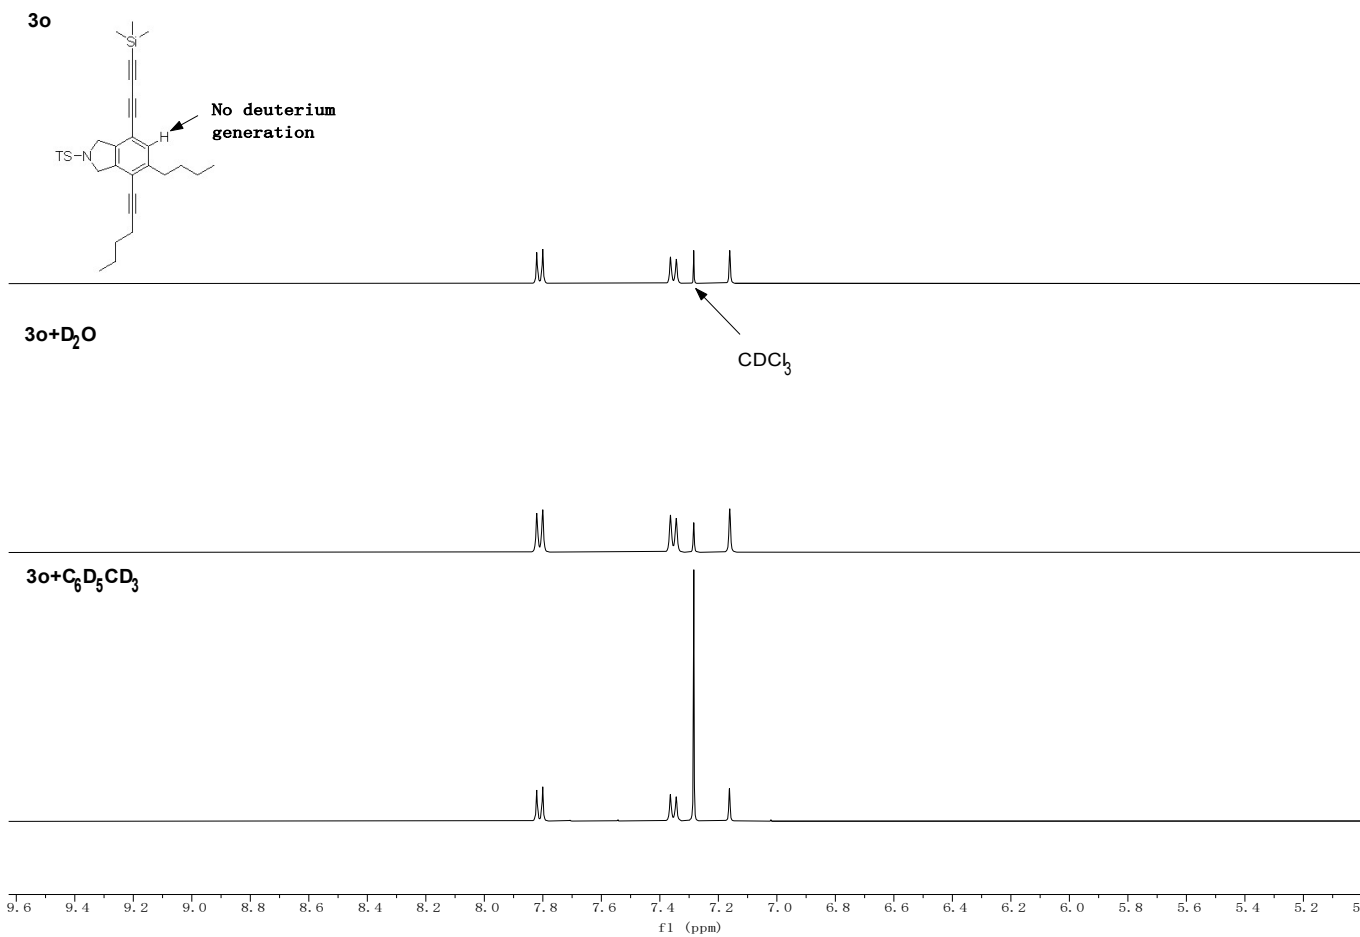

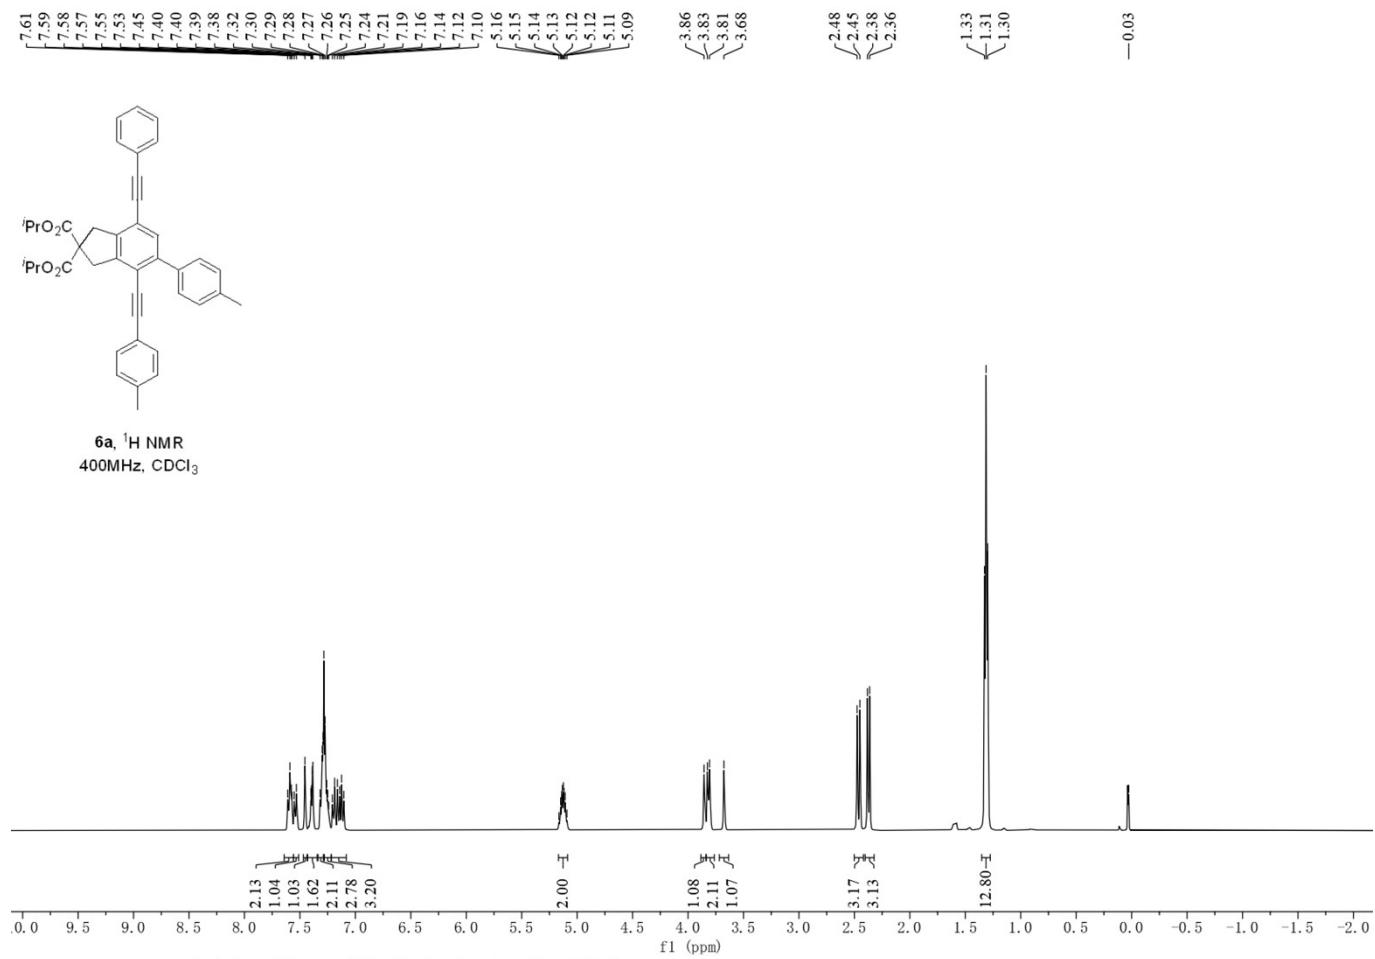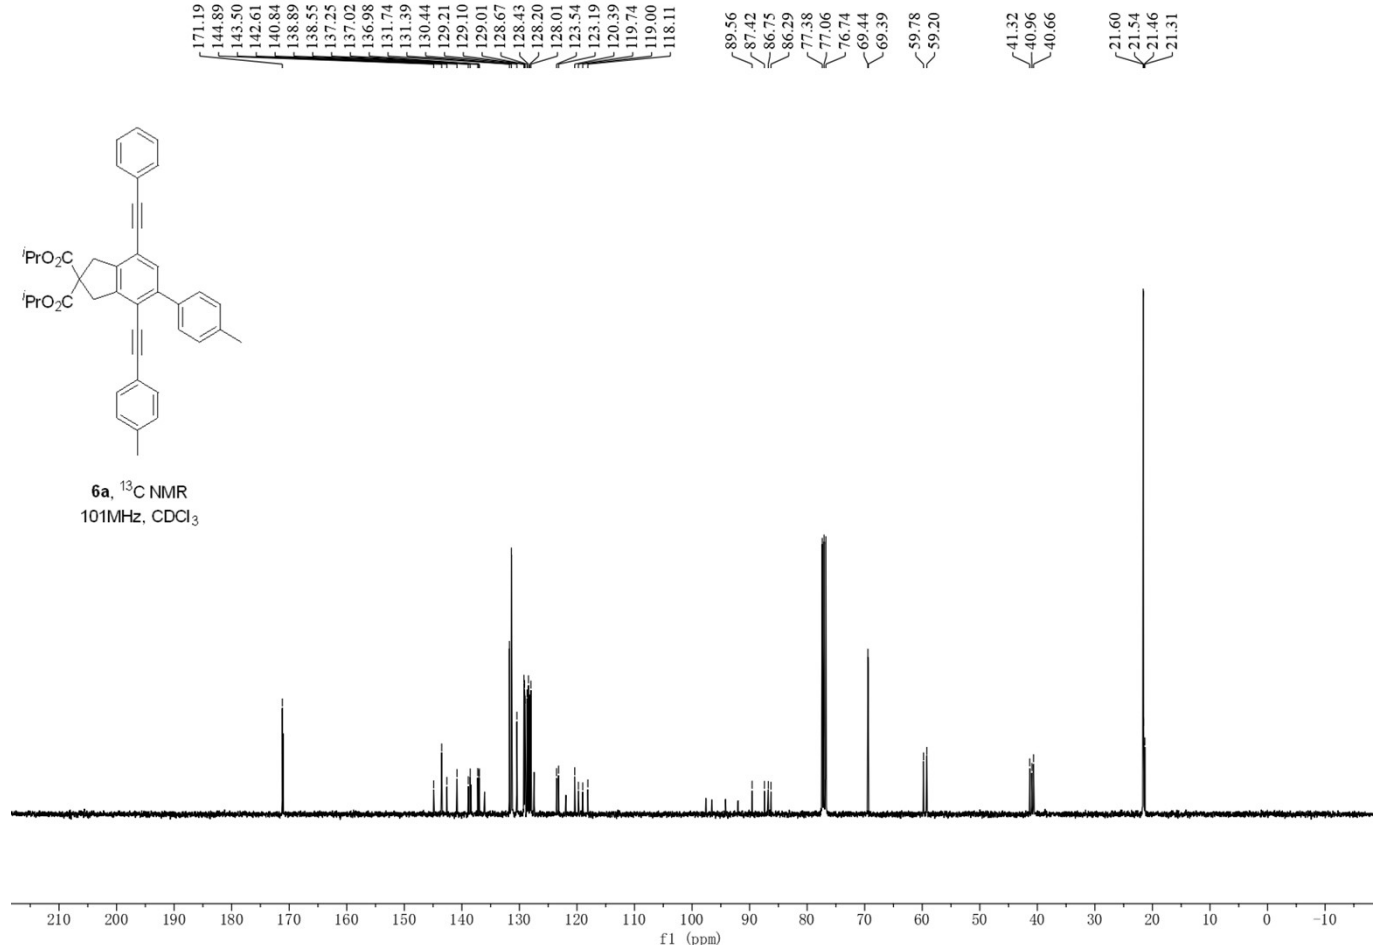

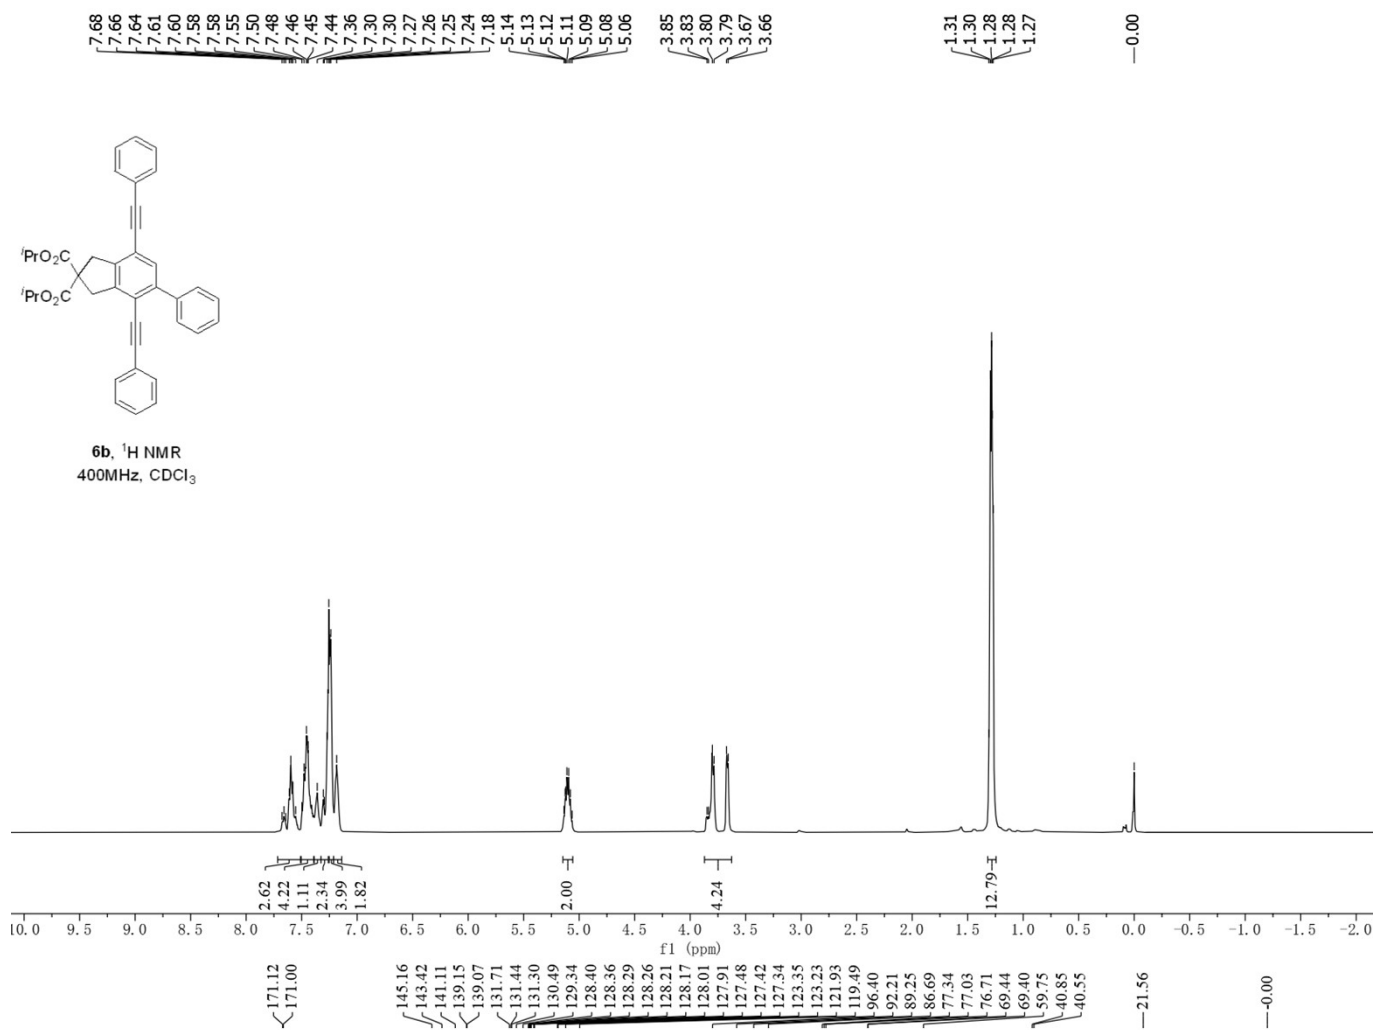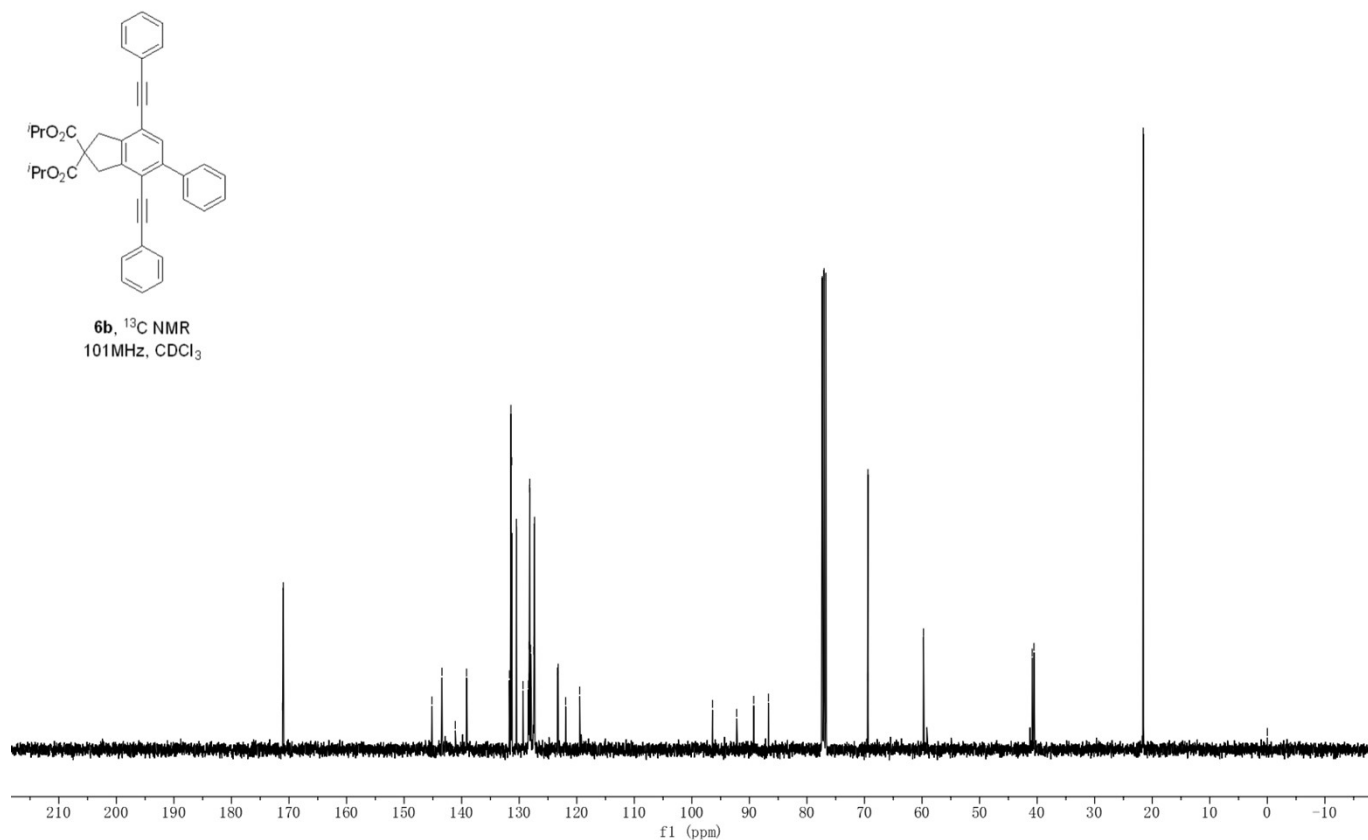

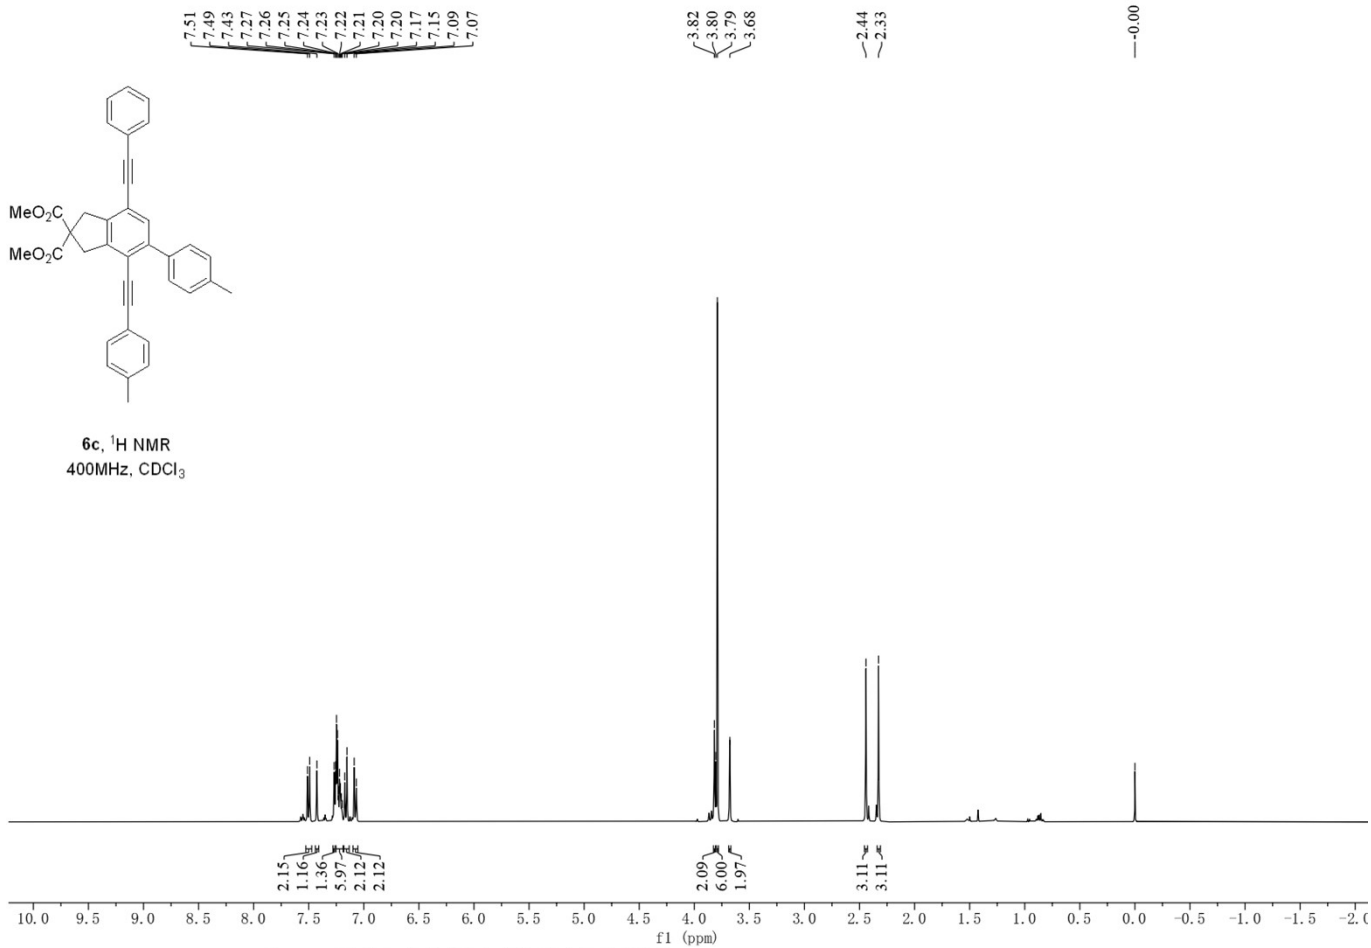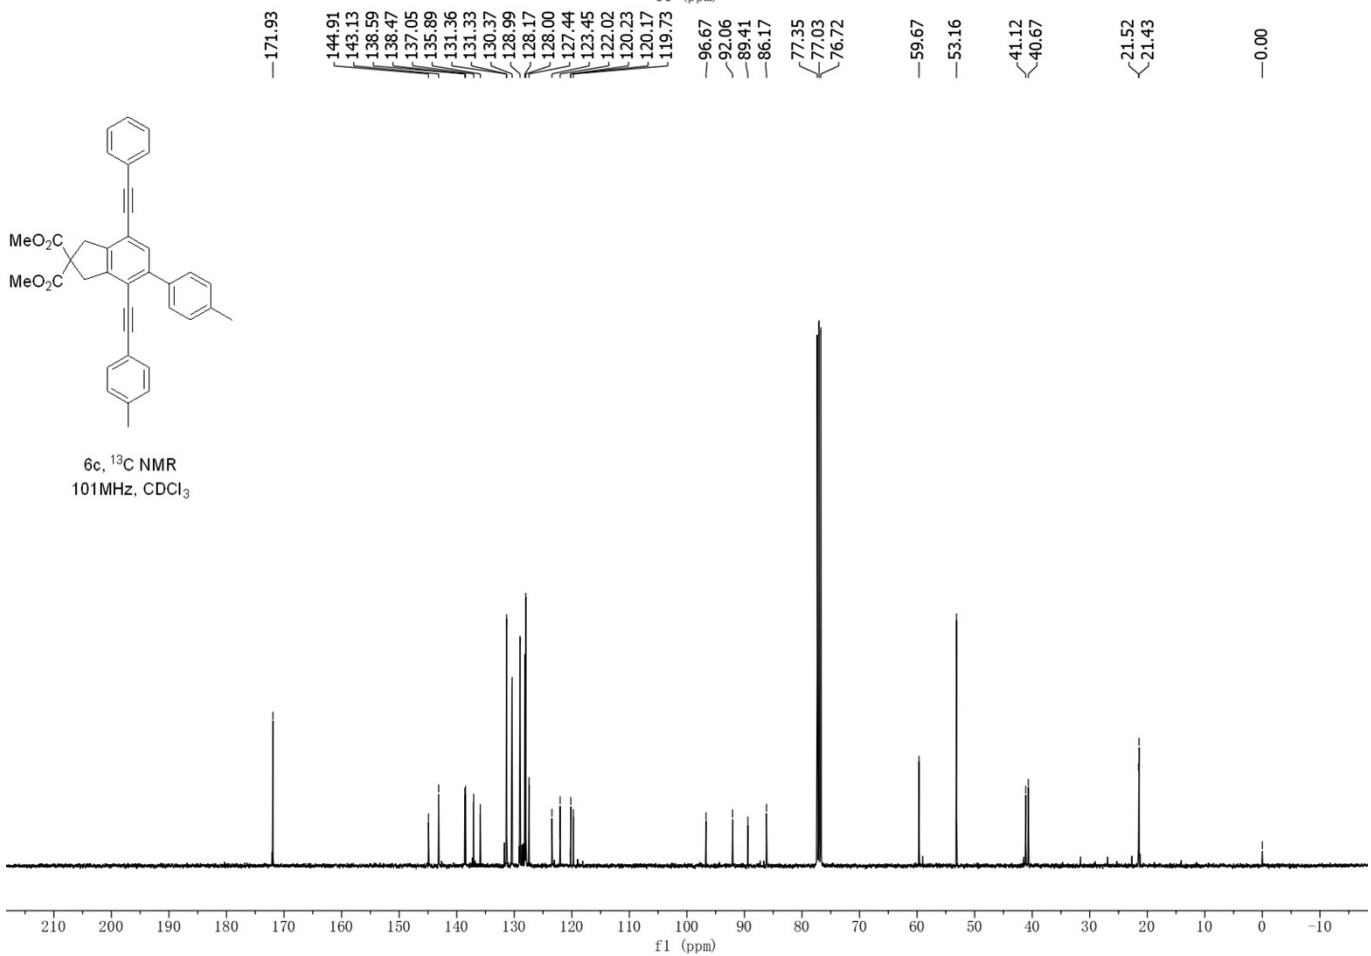

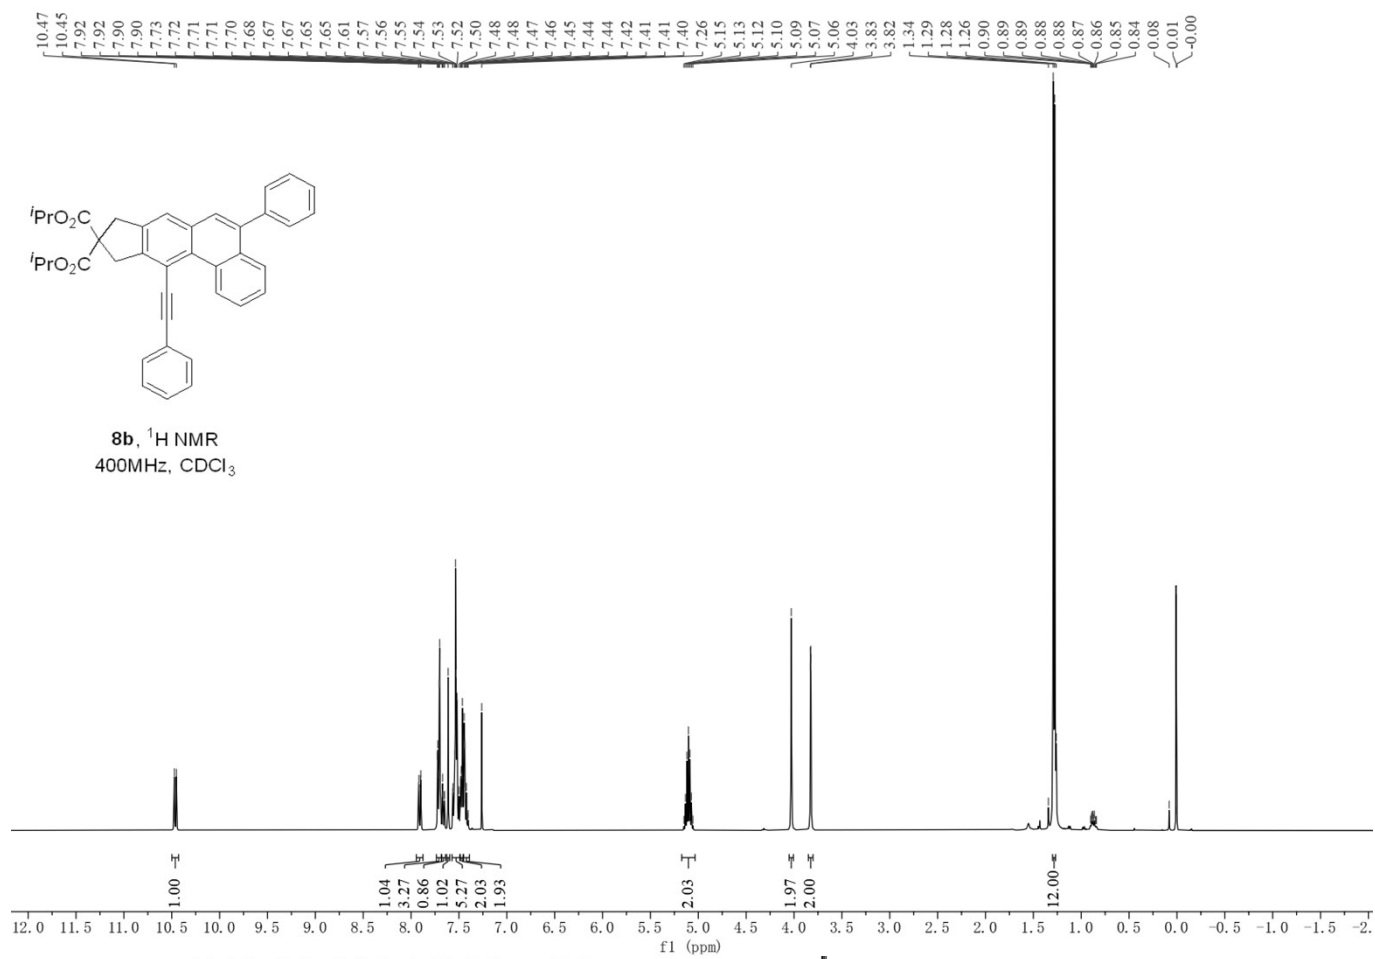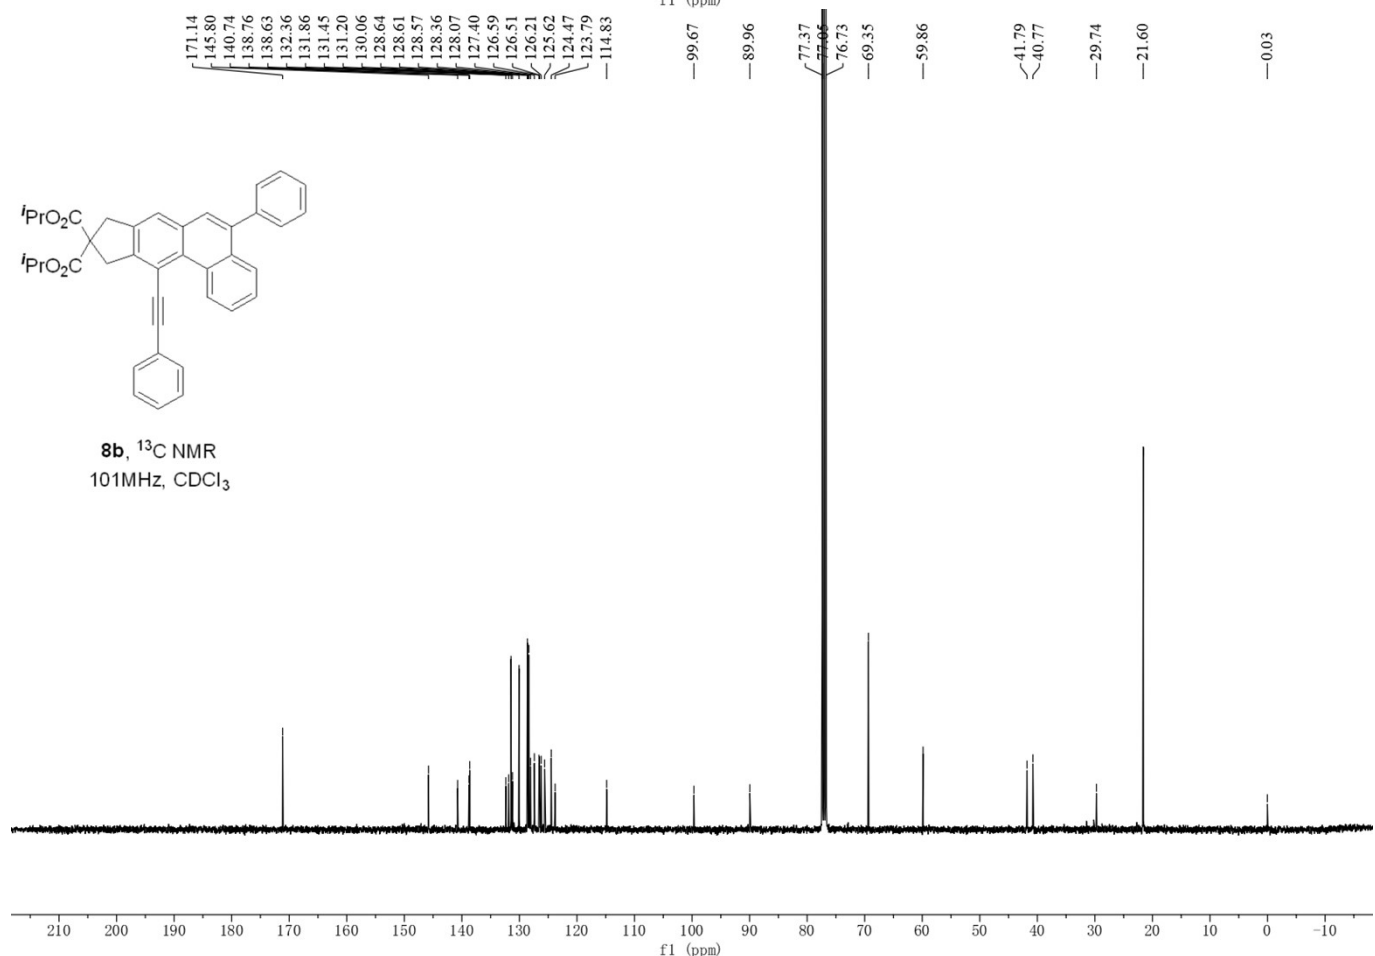

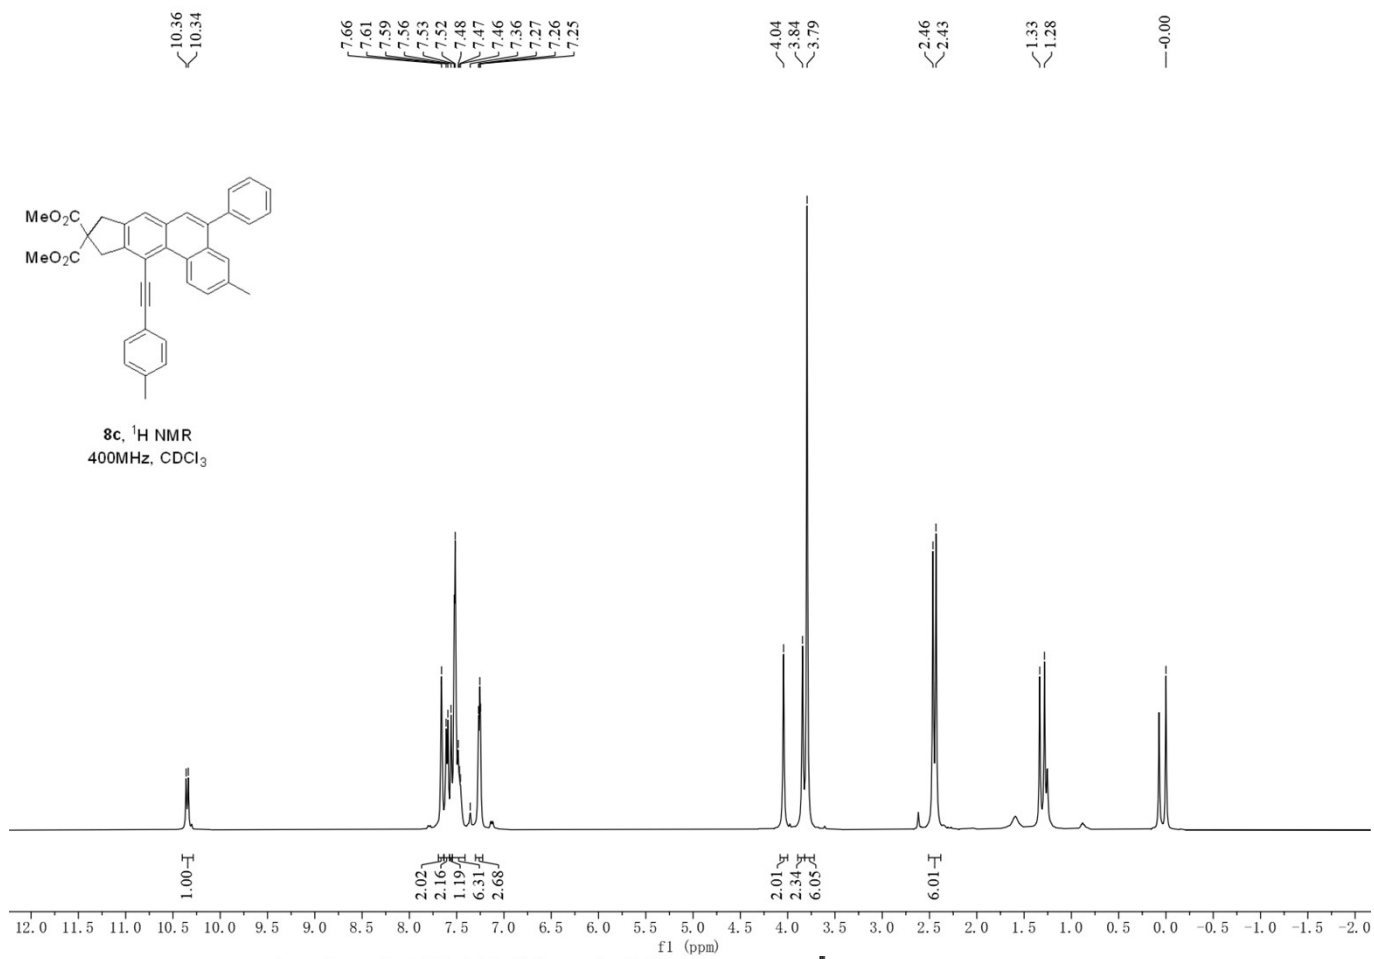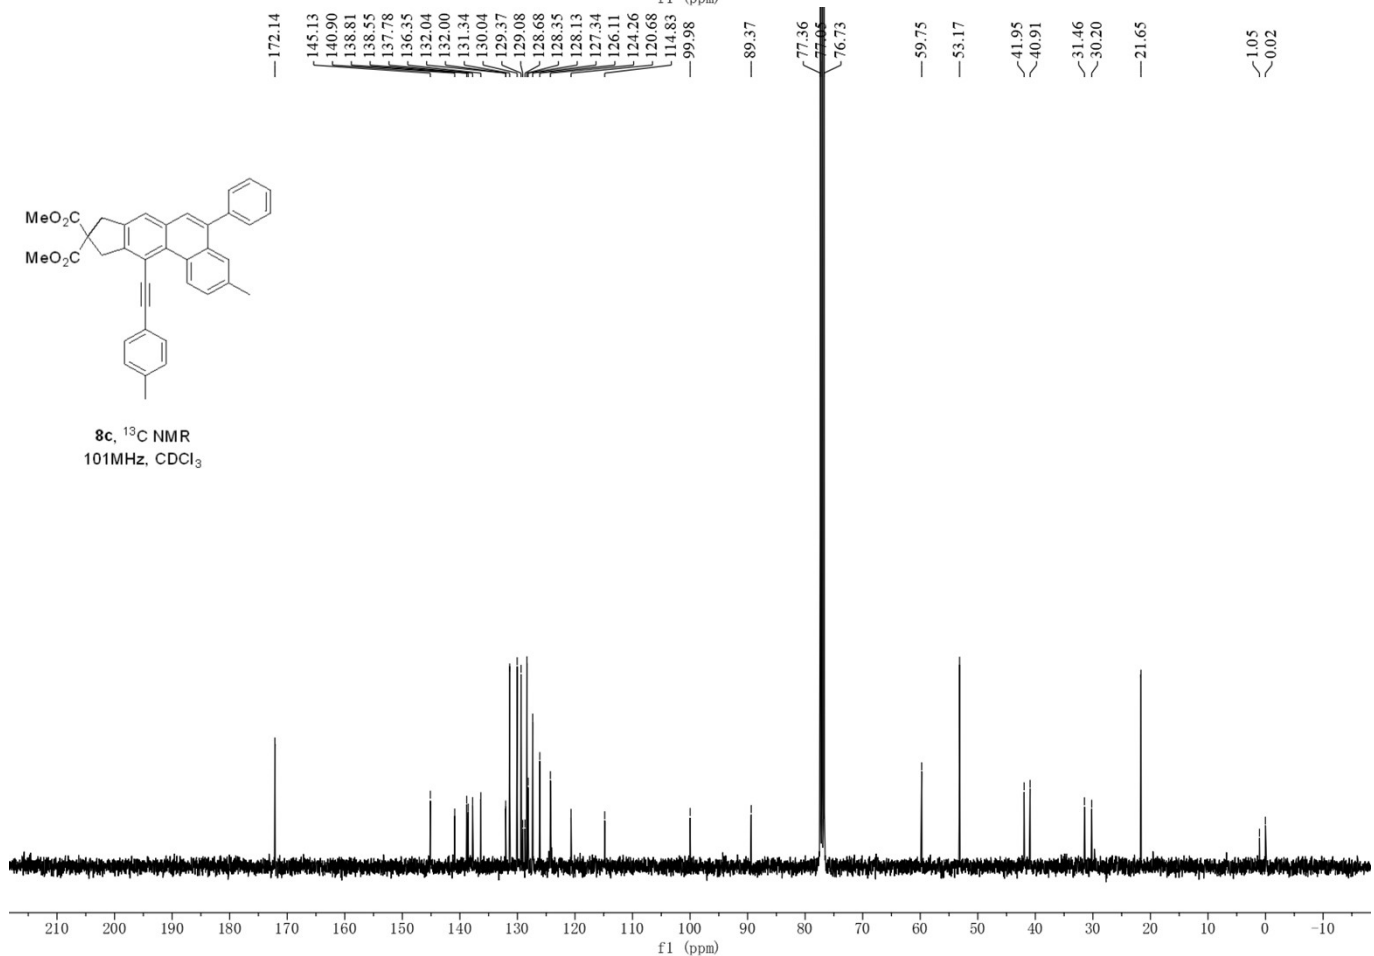



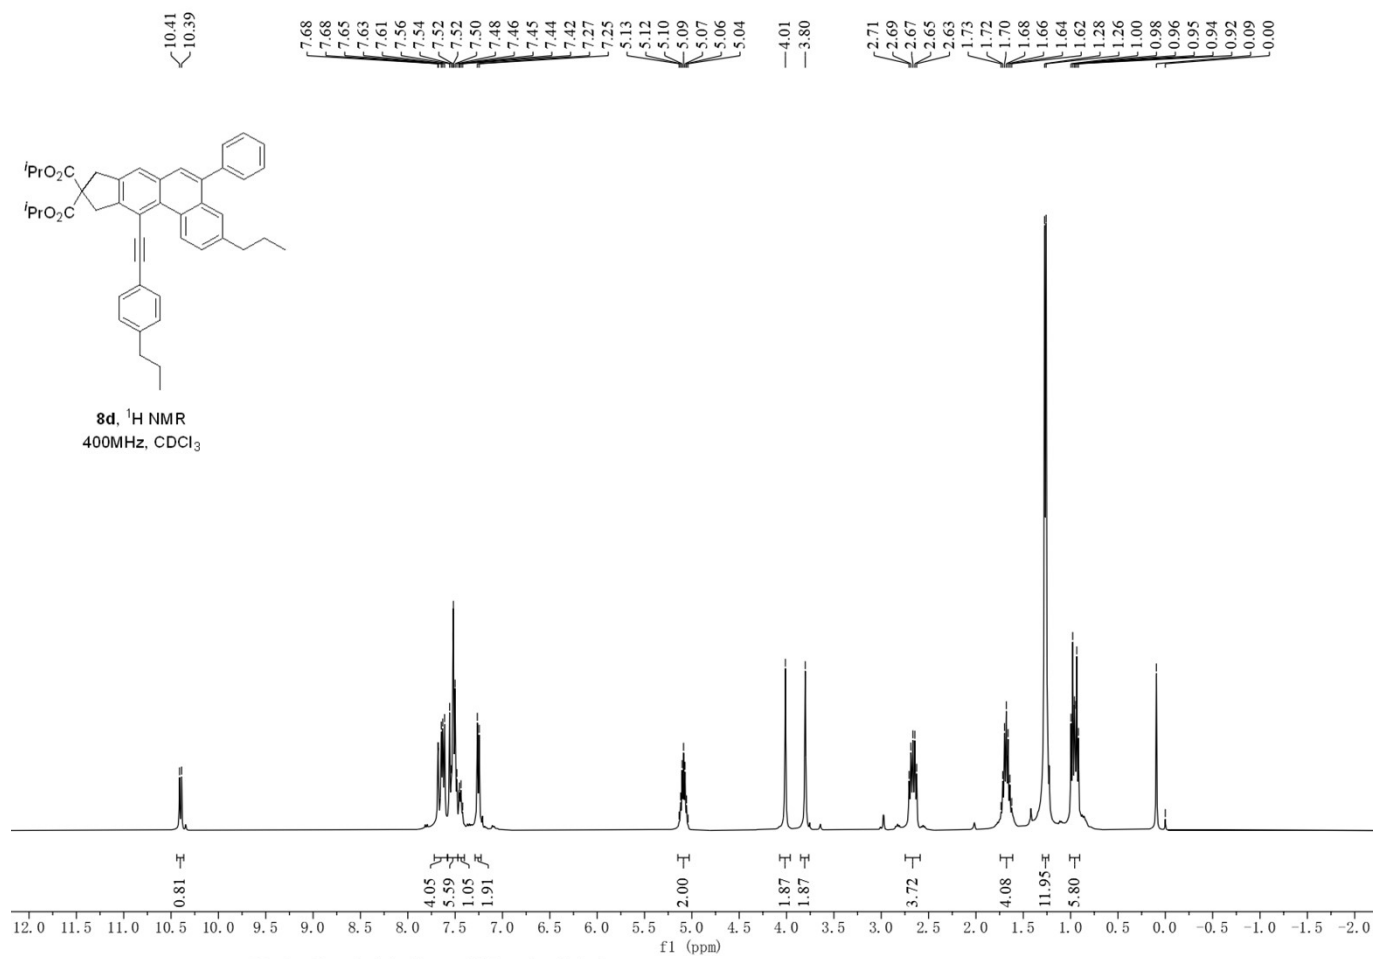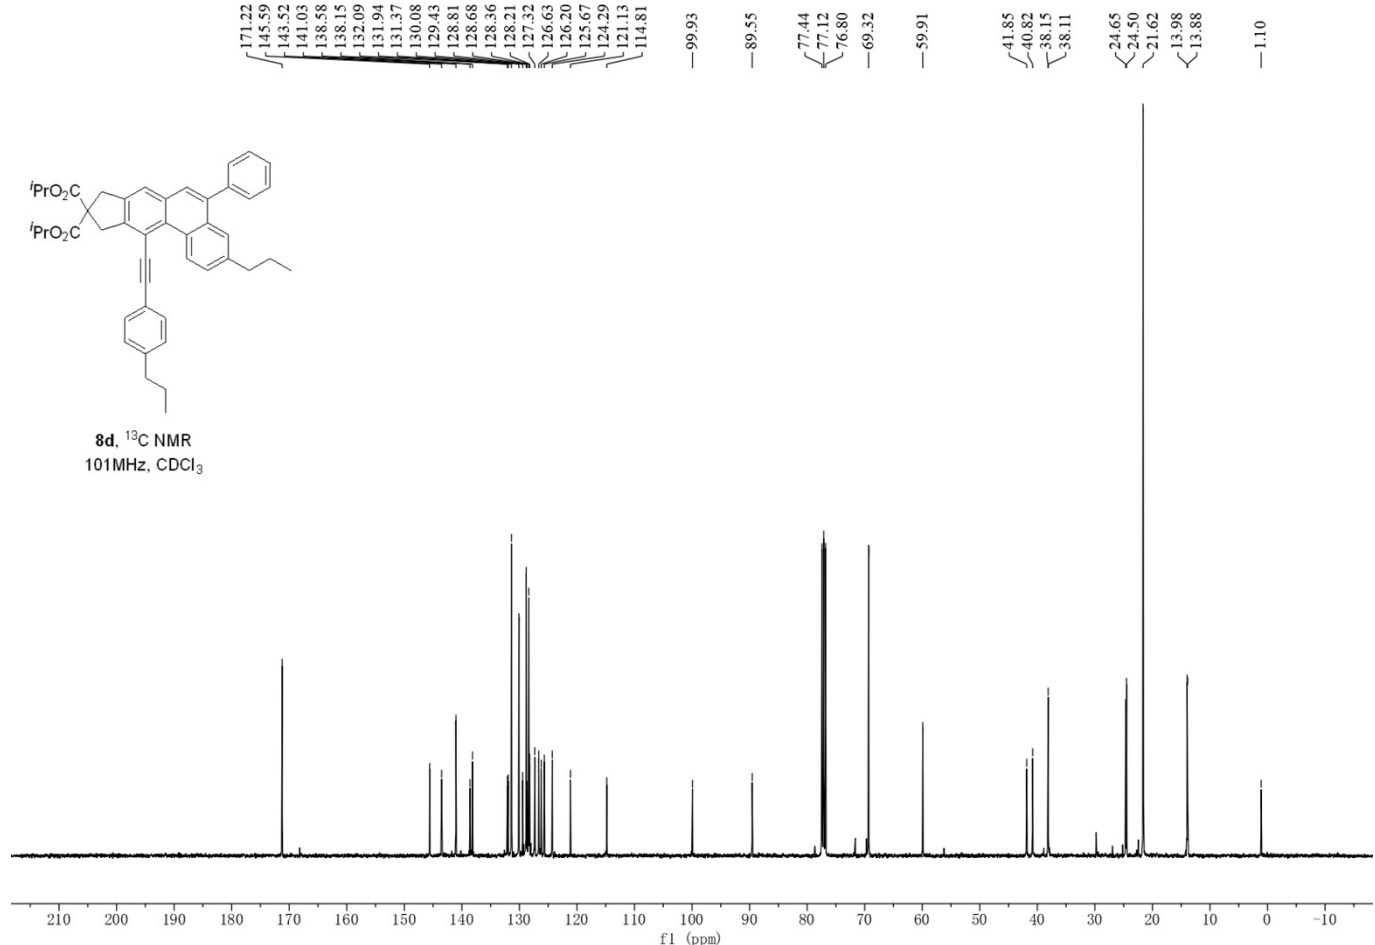

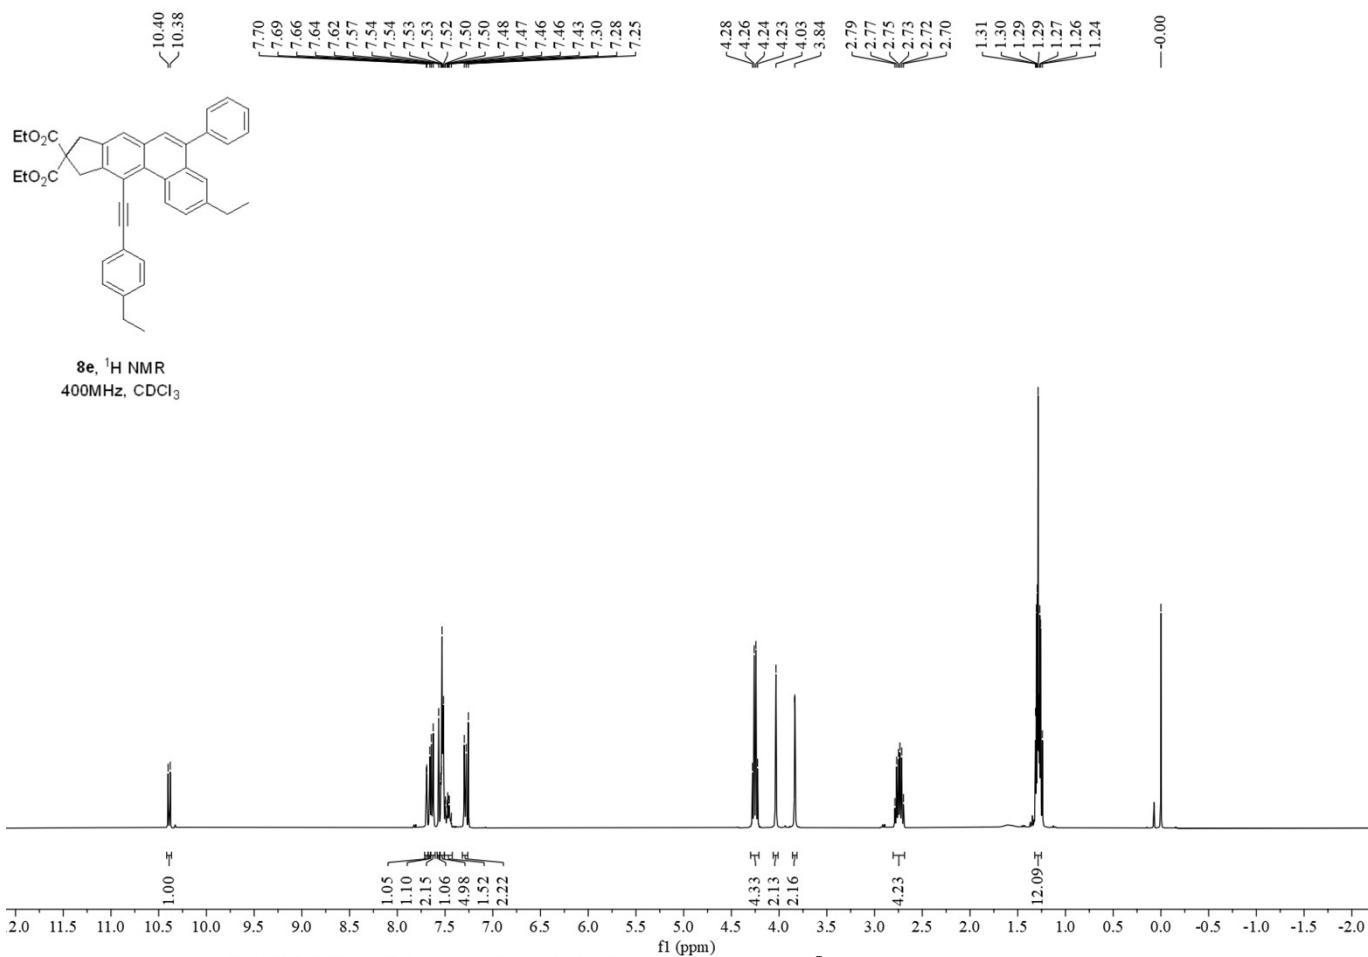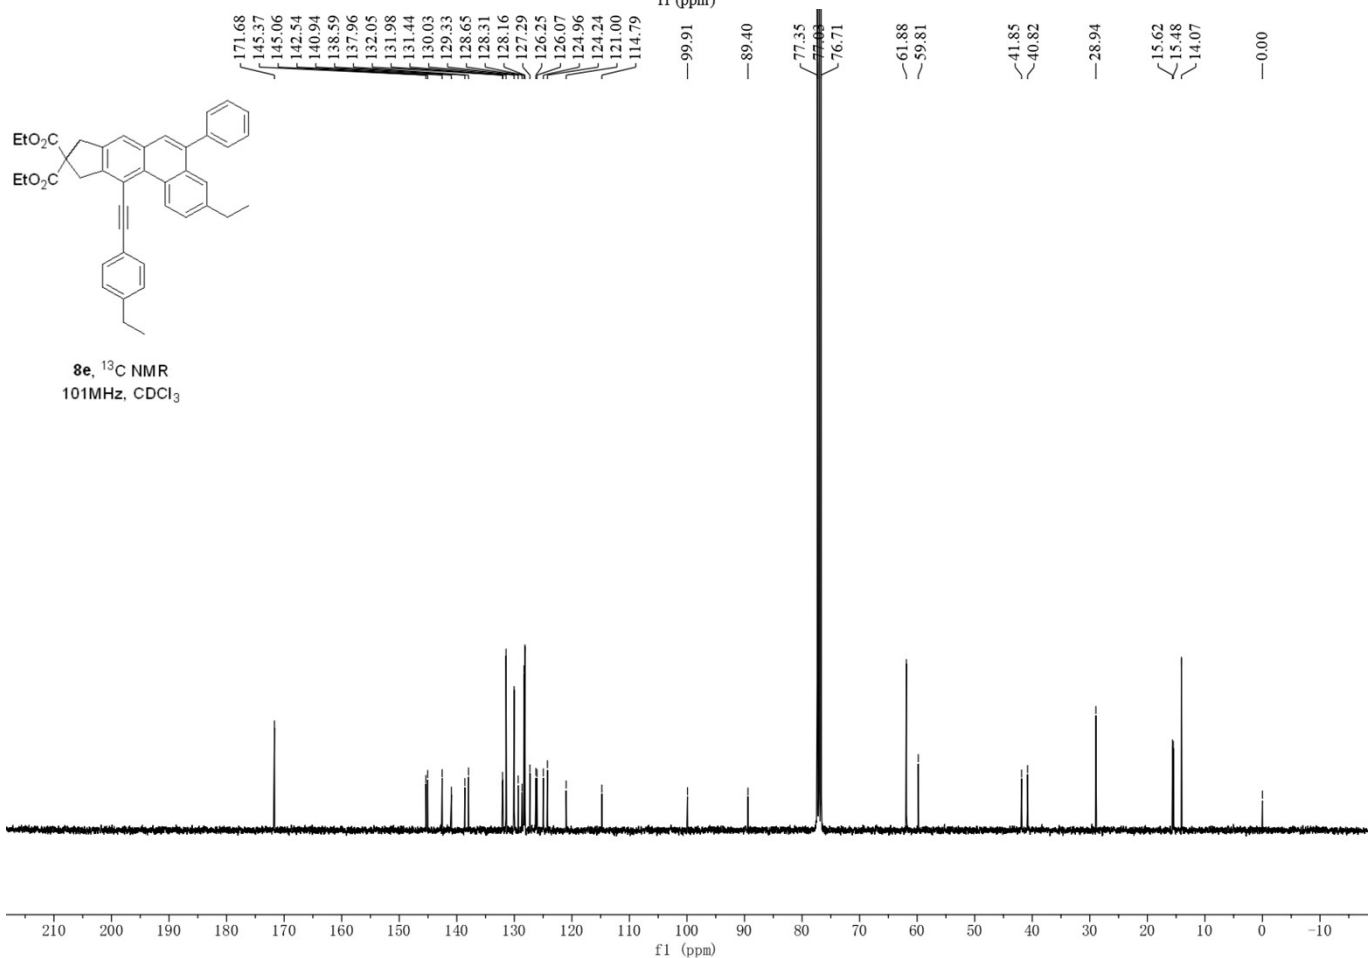

10.34  
10.32  
10.29  
7.80  
7.78  
7.67  
7.62  
7.57  
7.55  
7.53  
7.52  
7.51  
7.50  
7.49  
7.46  
7.45  
7.44  
7.42  
7.40  
7.40  
7.39  
7.38  
7.38  
7.36  
7.35  
7.34  
7.33  
7.31  
7.26  
7.23  
7.21

4.29  
4.28  
4.27  
4.26  
4.25  
4.24  
4.23  
4.23  
4.05  
4.04  
3.84  
3.83  
2.63  
2.43  
2.43  
2.05  
1.31  
1.31  
1.29  
1.29  
1.28  
1.27  
1.25  
0.88  
-0.00

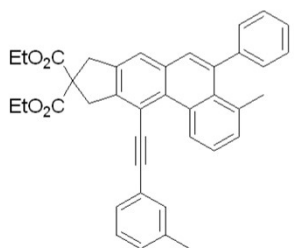

**8f**, <sup>1</sup>H NMR  
400MHz, CDCl<sub>3</sub>

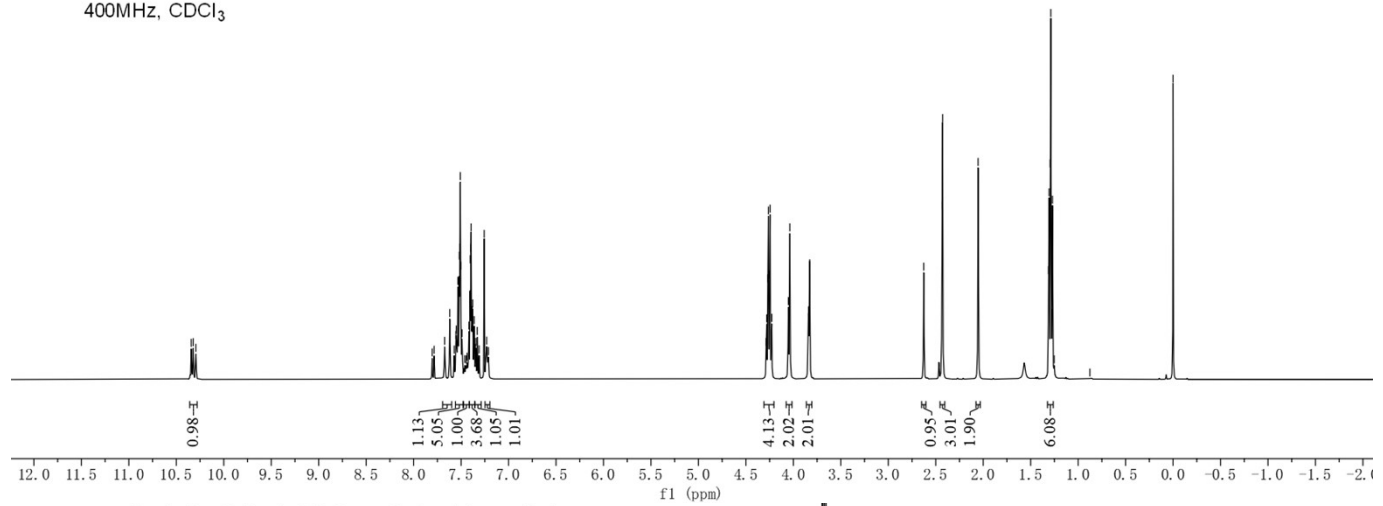

171.68  
145.65  
145.17  
140.88  
138.53  
138.29  
135.40  
132.35  
131.97  
131.59  
130.86  
130.59  
130.03  
129.45  
129.20  
128.32  
127.91  
127.34  
126.77  
126.45  
126.15  
125.06  
124.74  
123.83  
123.61  
115.03

99.89  
89.69  
77.37  
77.06  
76.74  
61.93  
59.80  
41.97  
40.79  
25.73  
22.24  
21.38  
14.10  
1.05  
0.03

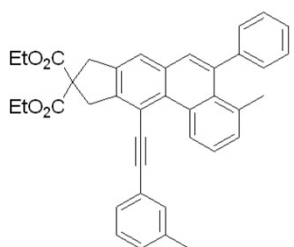

**8f**, <sup>13</sup>C NMR  
101MHz, CDCl<sub>3</sub>

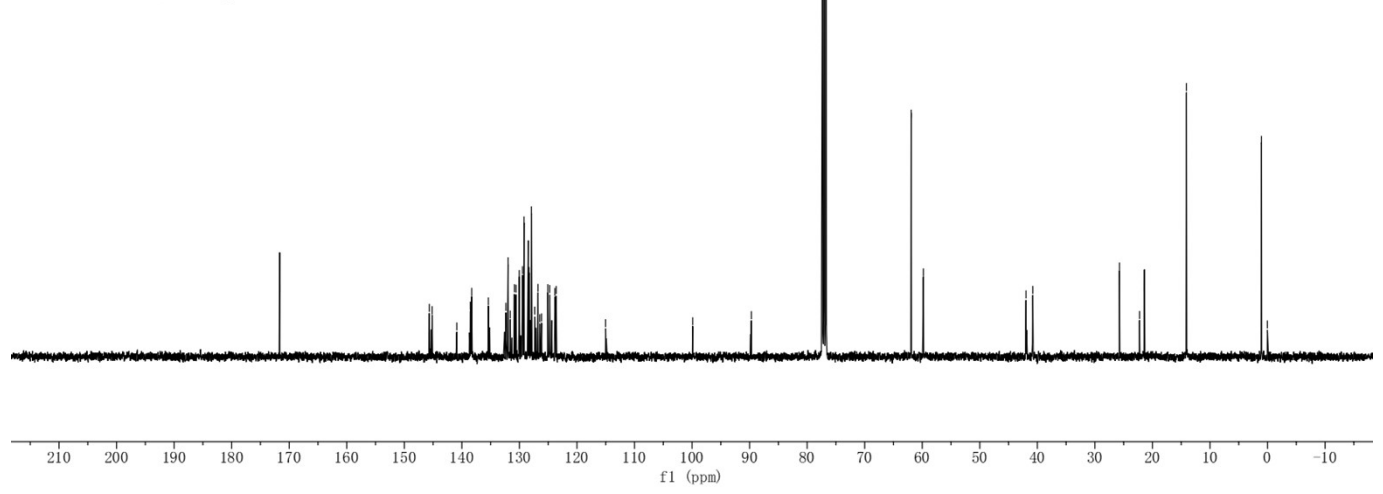

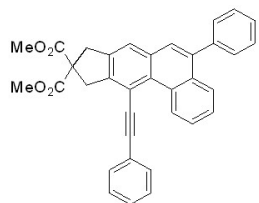

**8g**,  $^1\text{H}$  NMR  
400MHz,  $\text{CDCl}_3$

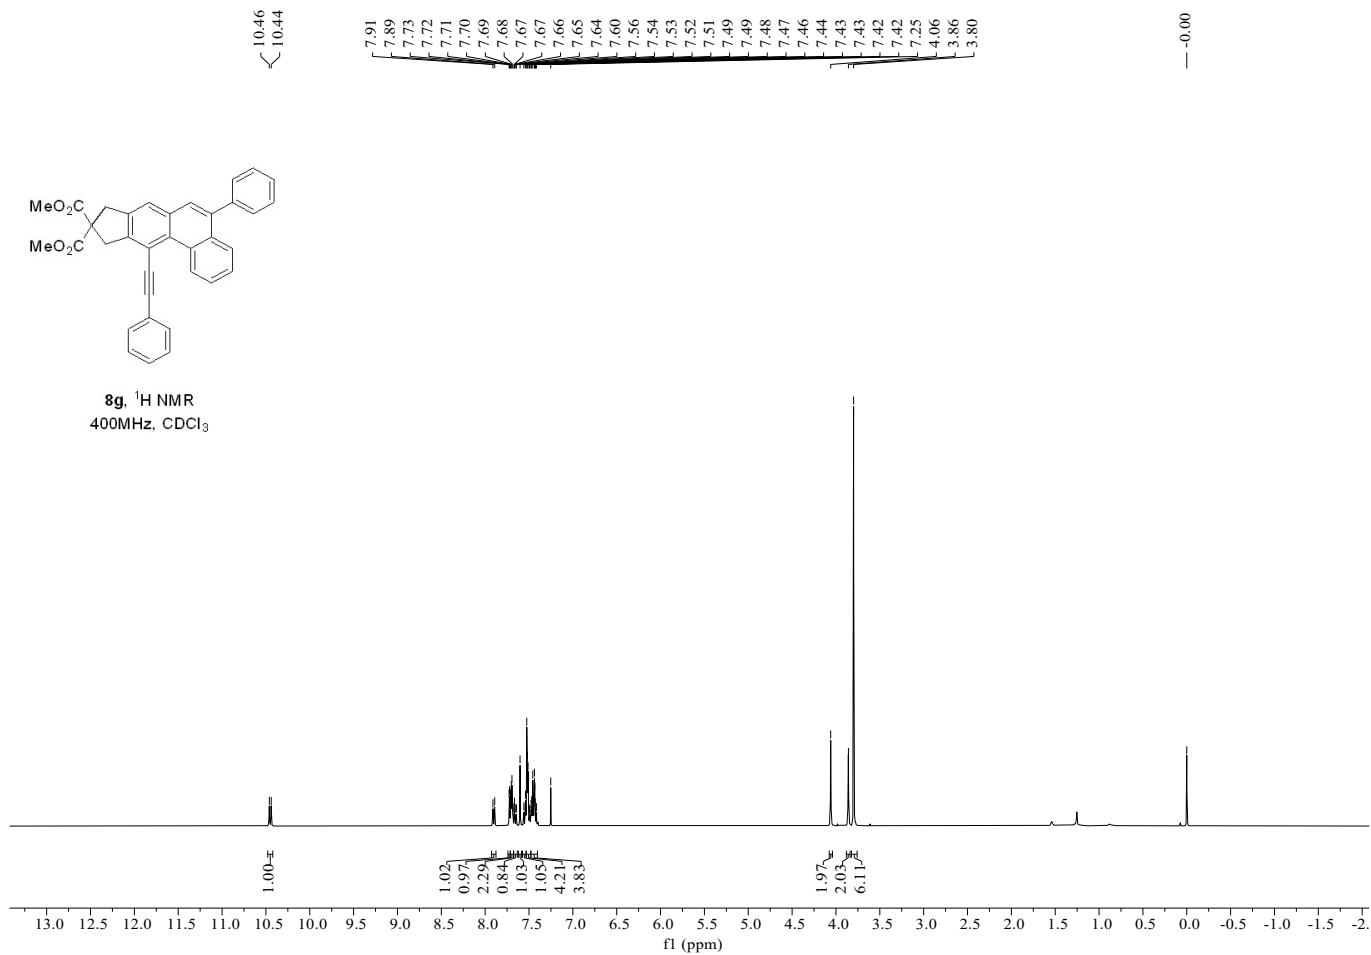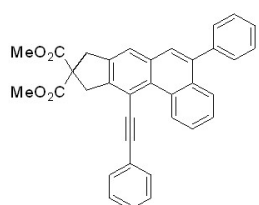

**8g**,  $^{13}\text{C}$  NMR  
101MHz,  $\text{CDCl}_3$

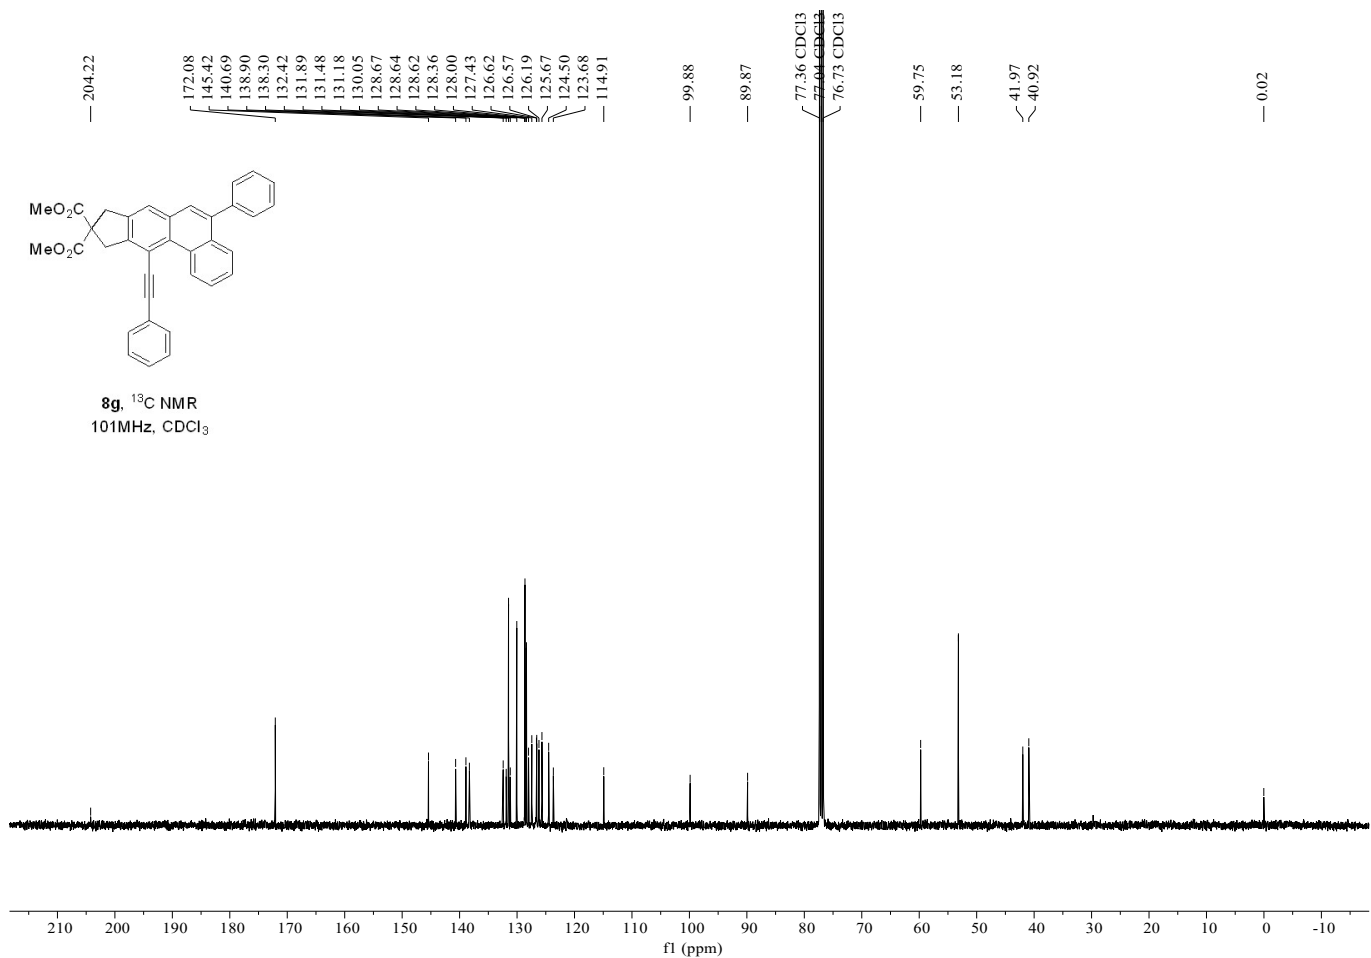

8e+D2O

10.40  
10.38

7.69  
7.66  
7.64  
7.62  
7.57  
7.54  
7.53  
7.53  
7.52  
7.50  
7.48  
7.47  
7.47  
7.46  
7.30  
7.28  
7.26

4.28  
4.26  
4.24  
4.23  
4.03  
3.84

2.79  
2.77  
2.75  
2.74  
2.72  
2.70

1.32  
1.31  
1.30  
1.29  
1.28  
1.28  
1.27  
1.26  
1.24

0.07  
0.00

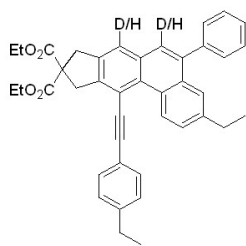

8e+D<sub>2</sub>O, <sup>1</sup>H NMR  
400MHz, CDCl<sub>3</sub>

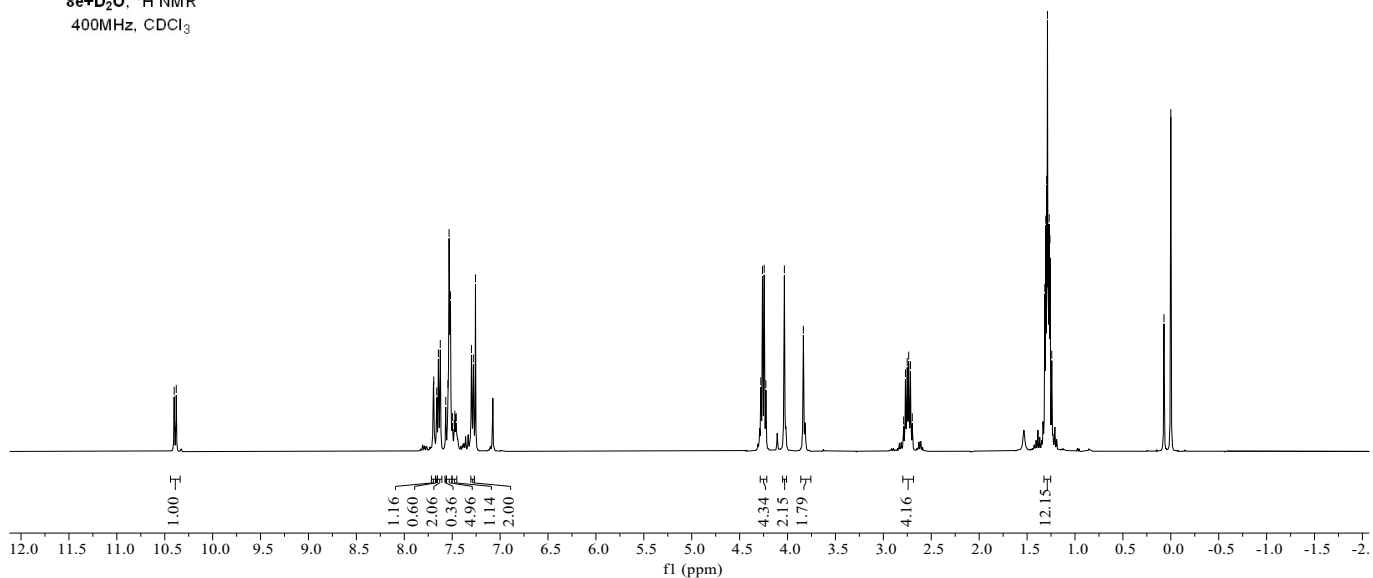

8e+CD3CN

10.40  
10.38

7.69  
7.66  
7.64  
7.62  
7.57  
7.54  
7.53  
7.53  
7.52  
7.50  
7.48  
7.47  
7.47  
7.46  
7.30  
7.28  
7.26

4.28  
4.26  
4.24  
4.23  
4.03  
3.83

2.79  
2.77  
2.75  
2.74  
2.72  
2.70

1.32  
1.31  
1.30  
1.29  
1.28  
1.28  
1.27  
1.26  
1.24

0.07  
0.00

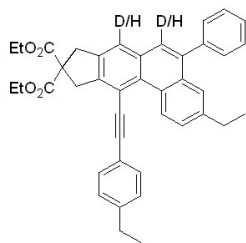

8e+CD<sub>3</sub>CN, <sup>1</sup>H NMR  
400MHz, CDCl<sub>3</sub>

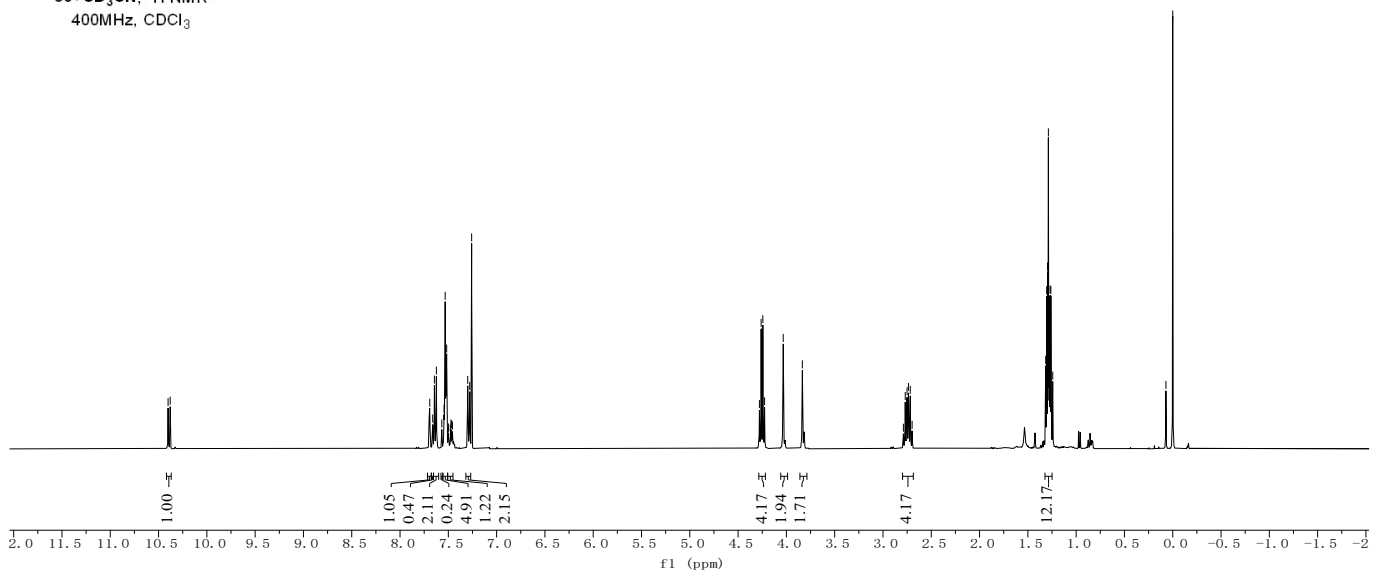

8e

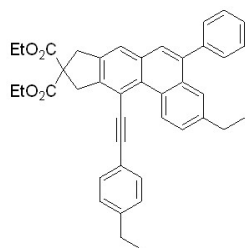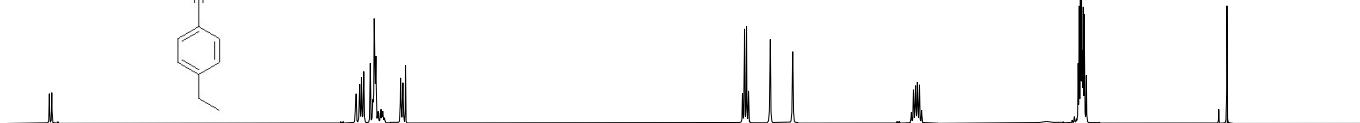

8e+CD<sub>3</sub>CN

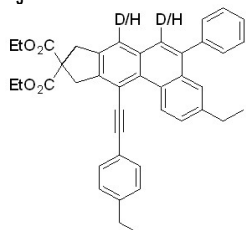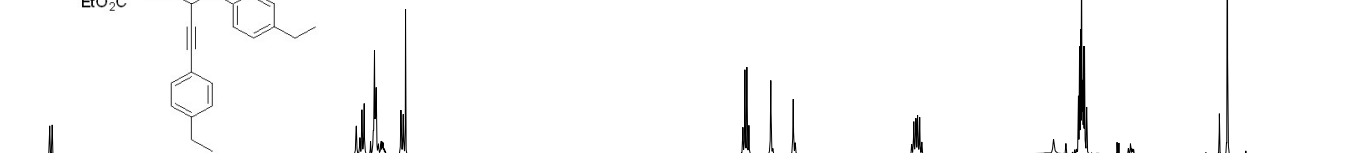

8e+D<sub>2</sub>O

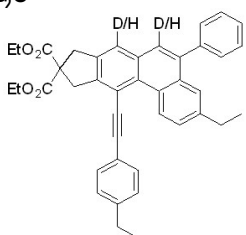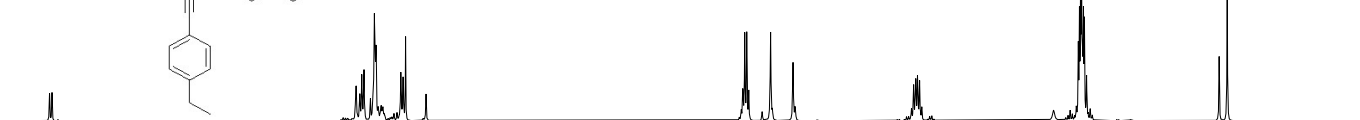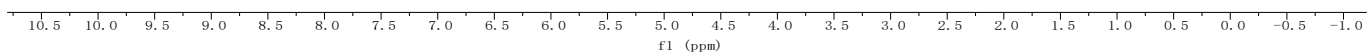

8e

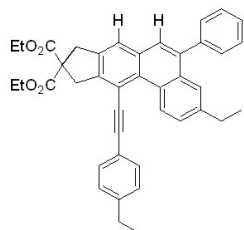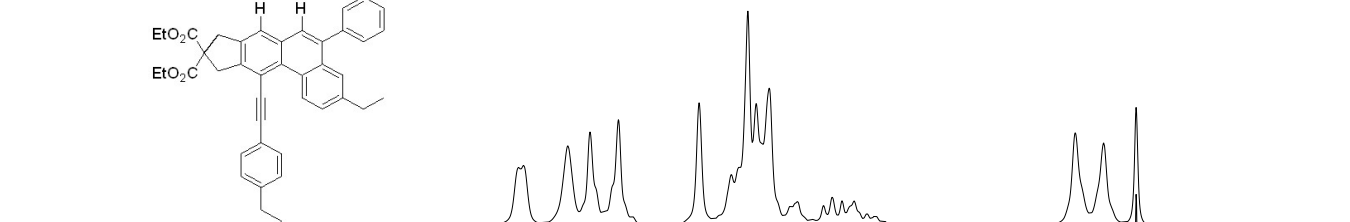

8e+CD<sub>3</sub>CN

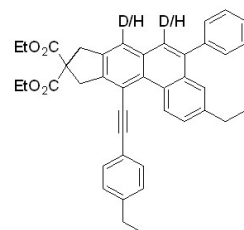

Replaced by deuterium

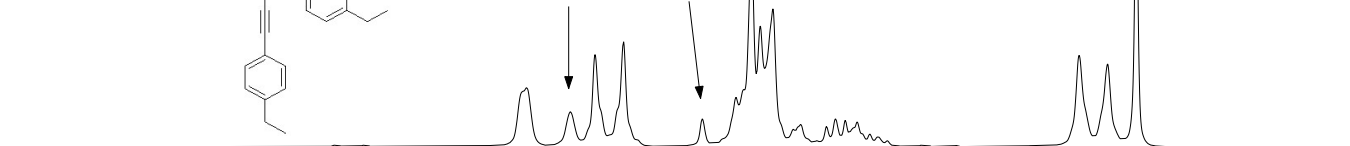

8e+D<sub>2</sub>O

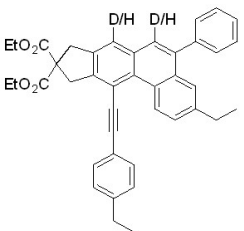

Replaced by deuterium

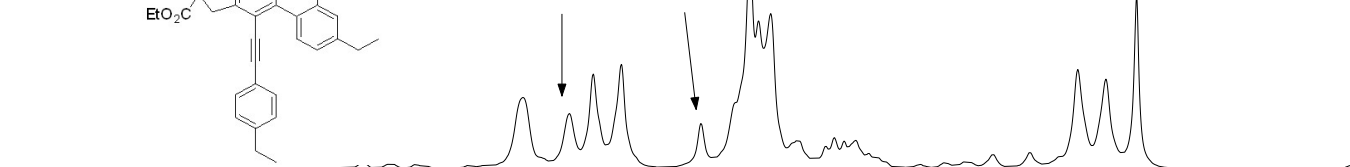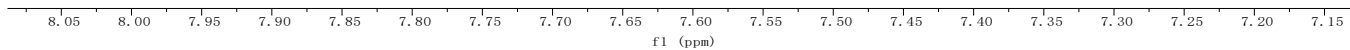

Supplement: d2ob02046g1.pdf [file d2ob02046g1.pdf]
